# Supplementary material for: A comprehensive solute–medium interaction model for anisotropic NMR data prediction
Source: Royal Society of Chemistry journal article supplement (doi:10.1039/d4cp04136d), 2025-01-01
Supplement: d4cp04136d1.pdf [file d4cp04136d1.pdf]

## Supporting Information: A Comprehensive Solute-Medium Interaction Model for Anisotropic NMR Data Prediction

Yizhou Liu

Analytical Research and Development, Pfizer Worldwide Research and Development, 445 Eastern Point Road, Groton, CT, 06340, USA. Email: Yizhou.Liu@pfizer.com

### Contents

|                                                                                                                                                                                                                         |    |
|-------------------------------------------------------------------------------------------------------------------------------------------------------------------------------------------------------------------------|----|
| Supplementary Theory and Method.....                                                                                                                                                                                    | 3  |
| The Order Transfer Equation for the Polymeric Gel Medium.....                                                                                                                                                           | 3  |
| Algorithm for Pseudoatomic Representation of the Medium Paraboloid.....                                                                                                                                                 | 5  |
| Supplementary Figures .....                                                                                                                                                                                             | 7  |
| Figure S1. Effects of surface tessellation level (NDIV) on the calculated $\Delta GCDS$ (a) and $\Delta Gelec$ (b) in chloroform by the SMD .....                                                                       | 7  |
| Figure S2. Comparison of $\Delta Gelec$ calculated using CM5 partial charges ( $\Delta Gelec, CM5$ ) and electron density $\rho_e$ ( $\Delta Gelec, \rho_e$ ) for sixteen compounds in chloroform (a) and DMSO (b)..... | 8  |
| Figure S3. The vectorial direction of pseudoatomic point dipoles in the medium model. The point dipole $mnp$ is located at the center of each pseudoatom.....                                                           | 9  |
| Figure S4. Convergence of SCF calculation for the electrostatic component of the medium solvation free energy $\Delta Gelec, m$ (Eq (8)) by the PCM.....                                                                | 10 |
| Figure S5. PES projections on the $r$ -energy plane generated from optimized P1B FP's for PMMA/chloroform. ....                                                                                                         | 13 |
| Figure S6. PES projections on the $r$ -energy plane generated from optimized P1B FP's for poly-HEMA/DMSO.....                                                                                                           | 14 |
| Figure S7. 2-D $r$ -energy PES of Coulomb interaction $\Delta \Delta Gelec, s/m$ and medium self-interaction $\Delta \Delta Gelec, m/m$ .....                                                                           | 15 |
| Solute Geometry and Predetermined Model Parameters .....                                                                                                                                                                | 16 |
| Table S1. Solute parameters for the sixteen compounds measured in PMMA/chloroform .                                                                                                                                     | 16 |
| Table S2. Solute parameters for the five compounds measured in poly-HEMA/DMSO.....                                                                                                                                      | 32 |
| Experimental vs Predicted RDC/RCSA Values .....                                                                                                                                                                         | 38 |
| Table S3. strychnine ( <b>1</b> ) in PMMA/chloroform <sup>1</sup> .....                                                                                                                                                 | 38 |
| Table S4. estrone ( <b>2</b> ) in PMMA/chloroform <sup>2</sup> .....                                                                                                                                                    | 39 |
| Table S5. retrorsine ( <b>3</b> ) in PMMA/chloroform <sup>2</sup> .....                                                                                                                                                 | 40 |
| Table S6. aquatolide ( <b>4</b> ) in PMMA/chloroform <sup>2</sup> .....                                                                                                                                                 | 41 |
| Table S7. caulamidine A ( <b>5</b> ) in PMMA/chloroform <sup>2</sup> .....                                                                                                                                              | 42 |

|                                                                                        |    |
|----------------------------------------------------------------------------------------|----|
| Table S8. 10-epi-8-deoxycumambrin B ( <b>6</b> ) in PMMA/chloroform <sup>3</sup> ..... | 43 |
| Table S9. mefloquine ( <b>7</b> ) in PMMA/chloroform <sup>1</sup> .....                | 43 |
| Table S10. menthol ( <b>8</b> ) in PMMA/chloroform <sup>1</sup> .....                  | 44 |
| Table S11. ludartin ( <b>9</b> ) in PMMA/chloroform <sup>4</sup> .....                 | 44 |
| Table S12. parthenolide ( <b>10</b> ) in PMMA/chloroform <sup>2</sup> .....            | 45 |
| Table S13. yohimbine ( <b>11</b> ) in PMMA/chloroform <sup>5</sup> .....               | 45 |
| Table S14. santonin ( <b>12</b> ) in PMMA/chloroform <sup>6</sup> .....                | 46 |
| Table S15. sesquiterpenoid-13 ( <b>13</b> ) in PMMA/chloroform <sup>7</sup> .....      | 46 |
| Table S16. artemisinin ( <b>14</b> ) in PMMA/chloroform <sup>8</sup> .....             | 47 |
| Table S17. 19-OH-eburnamonine ( <b>15</b> ) in PMMA/chloroform <sup>9</sup> .....      | 47 |
| Table S18. eburnamonine ( <b>16</b> ) in PMMA/chloroform <sup>5</sup> .....            | 48 |
| Table S19. Estrone ( <b>2</b> ) in poly-HEMA/DMSO .....                                | 49 |
| Table S20. retrorsine ( <b>3</b> ) in poly-HEMA/DMSO .....                             | 50 |
| Table S21. aquatolide ( <b>4</b> ) in poly-HEMA/DMSO <sup>11</sup> .....               | 51 |
| Table S22. menthol ( <b>8</b> ) in poly-HEMA/DMSO <sup>12</sup> .....                  | 52 |
| Table S23. cryptospirolepine ( <b>17</b> ) in poly-HEMA/DMSO <sup>11</sup> .....       | 52 |
| Supplementary References.....                                                          | 54 |

## Supplementary Theory and Method

### The Order Transfer Equation for the Polymeric Gel Medium

In paper 1, the order transfer equation (OTE) in the gel medium was derived by analogy to the OTE of the liquid crystal (LC) medium through the definition of an excluded volume, *i.e.*, the sample volume that is inaccessible to the solute due to the hard-body repulsion by the medium. However, when soft interactions between the solute and medium are considered, the excluded volume is no longer the only contributor to order transfer. Despite this difference, a formally identical OTE can still be obtained for the gel medium via a more direct derivation, as shown below.

A simple model system for the gel-based alignment medium contains a solute molecule, a giant gel polymer molecule, and the solvent molecules. The polymer is considered a fixed scaffold with no internal or external motions (the effects of internal motions can be partially accounted for by increasing the number of paraboloid structures as shown in paper 1). The solvent molecules are treated as polarizable continuum. Therefore, the solute is the only dynamic component in the system, which contrasts with the LC system in which both the solute and the mesogen have positional and orientational dynamics. The orientational distribution function (ODF) of the solute is then given by:

$$f_s(\mathbf{a}) = \frac{\int d\mathbf{r} \exp[-\beta \Delta G(\mathbf{a}, \mathbf{r})]}{\int d\mathbf{a} \int d\mathbf{r} \exp[-\beta \Delta G(\mathbf{a}, \mathbf{r})]} \quad S(1)$$

Here,  $f_s(\mathbf{a})$  is the solute ODF which is the probability density of the solute adopting a laboratory-frame orientation  $\mathbf{a}$ . Vector  $\mathbf{r}$  is a three-dimensional (3-D) vector which describes the position of the solute in the laboratory frame.  $\Delta G(\mathbf{a}, \mathbf{r})$  is the Gibbs free energy of the system as a function of the solute's orientation and position.

Prior to surface decomposition, the gel's  $vdW$  surface is represented by the MEB-excluded surface (MEB-ES) as described in paper 1, and the MEB-ES is subject to surface decomposition. Applying the polar sampling scheme as described in paper 1 to the decomposed medium surface, the following approximation is obtained:

$$\int d\mathbf{r} \exp[-\beta \Delta G(\mathbf{a}, \mathbf{r})] \approx \sum_{i=1}^n SP_i \int d\mathbf{a}_i f_i(\mathbf{a}_i) \int_0^{r_{max}} dr w_i(r) \exp[-\beta \Delta G_i(\mathbf{a}, r, \mathbf{a}_i)] + V_{iso} \quad S(2)$$

The sigma summation is over  $n$  paraboloid structures.  $\mathbf{a}_i$  is the laboratory-frame orientation of paraboloid  $i$ .  $f_i(\mathbf{a}_i)$  is the ODF representing the orientational histogram of all paraboloids in the same group having structure  $i$ . Different from the 3-D vector  $\mathbf{r}$  on the left side of Eq S(2), the scalar variable  $r$  on the right side of Eq S(2) is the distance from the solute's MEB center to the paraboloid surface along the normal vector of the paraboloid surface, which is referred to as the relative position between the solute and the paraboloid in the main text.  $s$  is the area of the closed MEB-accessible surface (MEB-AS) of the medium, and  $P_i$  is the fraction of  $s$  that is attributed to paraboloid structure  $i$  ( $\sum_i P_i = 1$ ).  $r_{max}$  is the maximal distance within which the solute and medium can effectively interact, set to  $r_{max} = r_{MEB} + 2R_s$  in model B.  $V_{iso}$  is the sample volume within which  $\Delta G(\mathbf{a}, \mathbf{r})$  is zero, *i.e.*, there is no solute-medium interaction at any  $\mathbf{a}$ , which corresponds to solute

positions whose distances to any paraboloid are more than  $r_{max}$ . Realizing  $\Delta G_i(\mathbf{a}, r, \mathbf{a}_i)$  only depends on the relative orientation between the solute and the paraboloid, the first term on the right side of Eq S(2) can be transformed from the laboratory-frame to the solute frame, leading to:

$$\int d\mathbf{r} \exp[-\beta \Delta G(\mathbf{a}, \mathbf{r})] \approx \sum_{i=1}^n SP_i \int d\boldsymbol{\Omega} f_i(\hat{R}\mathbf{a}) \int_0^{r_{max}} dr w_i(r) \exp[-\beta \Delta G_i(\boldsymbol{\Omega}, r)] + V_{iso} \quad S(3)$$

Here,  $\boldsymbol{\Omega}$  is the relative orientation between the paraboloid frame and the solute frame.  $\hat{R}$  is the rotation matrix for the transformation between the solute and paraboloid axis frames such that  $\hat{R}\mathbf{a}$  gives the laboratory-frame orientation of the paraboloid. Plugging S(3) into S(1), expanding both  $f_s(\mathbf{a})$  and  $f_i(\hat{R}\mathbf{a})$  into power series, and equating the coefficients of the 2<sup>nd</sup> order terms, leads to the OTE as shown in Eq (1) of the main text, also shown below:

$$\sqrt{\frac{4\pi}{5}} \langle Y_2^m \rangle_S \approx \sum_{m'=-2}^2 \sum_{i=1}^n \sqrt{\frac{4\pi}{5}} \langle Y_2^{m'} \rangle_i \left\{ \frac{SP_i}{8\pi^2 V_a^r} \int d\boldsymbol{\Omega} D_{m',m}^2(\hat{R}) \int_0^{r_{max}} dr w_i(r) \exp[-\beta \Delta G_i(\boldsymbol{\Omega}, r)] \right\} \quad S(4)$$

The volumetric parameter  $V_a^r$  is the denominator in Eq S(1):

$$V_a^r = \int d\mathbf{a} \int d\mathbf{r} \exp[-\beta \Delta G(\mathbf{a}, \mathbf{r})] \quad S(5)$$

If only hard-body interaction is considered,  $\exp[-\beta \Delta G(\mathbf{a}, \mathbf{r})]$  is either zero or 1, so  $V_a^r$  corresponds to the average volume in the sample that is accessible to the solute when all solute orientations are considered. When soft interactions are considered,  $V_a^r$  no longer represents the exact accessible volume.  $V_a^r$  does not require explicit calculation but can be absorbed into the alignment amplitude during the model optimization process.

## Algorithm for Pseudoatomic Representation of the Medium Paraboloid

Following the convention in paper 1, the paraboloid is described by:

$$y = -\frac{1}{2}(k_x x^2 + k_z z^2) \quad S(6)$$

First, evenly spaced grid points  $(x[i], -\frac{1}{2}(k_x x^2[i] + k_z z^2[j]), z[j])$  are created on the 3D surface. The indices  $i$  and  $j$  are positive or negative integers or zero. The two arrays  $x[i]$  and  $z[j]$  can be generated independently by the same method as shown below. The first point is chosen on the origin  $(0, 0, 0)$ , *i.e.*,  $x[0] = 0$  and  $z[0] = 0$ . Due to the symmetry  $x[-i] = -x[i]$  and  $z[-j] = -z[j]$ , only positive  $i$  and  $j$  need be considered. In this work,  $x[1]$  and  $z[1]$  are both set to  $d = 1.8 \text{ \AA}$ . Then, on the parabolic cross-section by any given  $z[j]$ , the distance between the two neighboring points  $(x[1], -\frac{1}{2}(k_x x^2[1] + k_z z^2[j]), z[j])$  and  $(x[0], -\frac{1}{2}(k_x x^2[0] + k_z z^2[j]), z[j])$ , labeled as  $L_x(1,0)$ , is  $\sqrt{d^2 + \frac{1}{4}k_x^2 d^4}$ . Likewise, on the parabolic cross-section by any given  $x[i]$ , the distance between the two neighboring points  $(x[i], -\frac{1}{2}(k_x x^2[i] + k_z z^2[0]), z[0])$  and  $(x[i], -\frac{1}{2}(k_x x^2[i] + k_z z^2[1]), z[1])$ , labeled as  $L_z(1,0)$ , is  $\sqrt{d^2 + \frac{1}{4}k_z^2 d^4}$ . The other grid points are generated recursively such that:

$$\begin{cases} L_x(i, i+1) = \sqrt{d^2 + \frac{1}{4}k_x^2 d^4} \\ L_z(j, j+1) = \sqrt{d^2 + \frac{1}{4}k_z^2 d^4} \end{cases} \quad S(7)$$

for any  $i$  and  $j$ .

Defining the increment  $\Delta_{x,i+1} = x[i+1] - x[i]$ , the following quartic equation can be used to solve for  $\Delta_{x,i+1}$  that satisfies the first equation in Eq S(7):

$$\frac{k_x^2}{4} \Delta_{x,i+1}^4 + k_x^2 x[i] \Delta_{x,i+1}^3 + (k_x^2 x^2[i] + 1) \Delta_{x,i+1}^2 - \left(d^2 + \frac{1}{4}k_x^2 d^4\right) = 0 \quad S(8)$$

, in which  $\Delta_{x,i+1}$  takes the only real root.

Similarly, the  $z[j]$  array can be expanded from  $z[1]$  recursively using the following equation:

$$\frac{k_z^2}{4} \Delta_{z,i+1}^4 + k_z^2 z[i] \Delta_{z,i+1}^3 + (k_z^2 z^2[i] + 1) \Delta_{z,i+1}^2 - \left(d^2 + \frac{1}{4}k_z^2 d^4\right) = 0 \quad S(9)$$

Applying Eq S(8) and S(9) creates equally spaced grid points on the paraboloid surface. As mentioned in the main text, only the paraboloid region surrounding the origin can interact with the solute, so only the points with  $(x[i], z[j])$  satisfying the following conditions are considered:

$$\begin{cases} x^2[i] + z^2[j] \leq (r_{MEB} + 2.5R_s)^2 \\ \frac{1}{2}(k_x x^2[i] + k_z z^2[j]) \leq r_{MEB} \end{cases} \quad S(10)$$

Next, a pseudoatom is installed for each grid point. Because the pseudoatom has a finite *vdW* radius of  $r_p = 1.2 \text{ \AA}$ , the pseudoatomic center is placed below the paraboloid surface on its normal vector with a distance  $r_p$  to the surface point  $(x[i], -\frac{1}{2}(k_x x^2[i] + k_z z^2[j]), z[j])$ . By this construction, all pseudoatoms are beneath the paraboloid surface and tangent to it, touching only at the grid points.

The center position  $(x_p, y_p, z_p)$  of the pseudoatom that is tangent at  $(x[i], -\frac{1}{2}(k_x x^2[i] + k_z z^2[j]), z[j])$  is calculated by:

$$\left\{ \begin{array}{l} x_p = x[i] - \frac{k_x x[i] r_p}{\sqrt{1 + k_x^2 x^2[i] + k_z^2 z^2[j]}} \\ y_p = -\frac{1}{2}(k_x x^2[i] + k_z z^2[j]) - \frac{r_p}{\sqrt{1 + k_x^2 x^2[i] + k_z^2 z^2[j]}} \\ z_p = z[j] - \frac{k_z z[j] r_p}{\sqrt{1 + k_x^2 x^2[i] + k_z^2 z^2[j]}} \end{array} \right. \quad S(11)$$

## Supplementary Figures

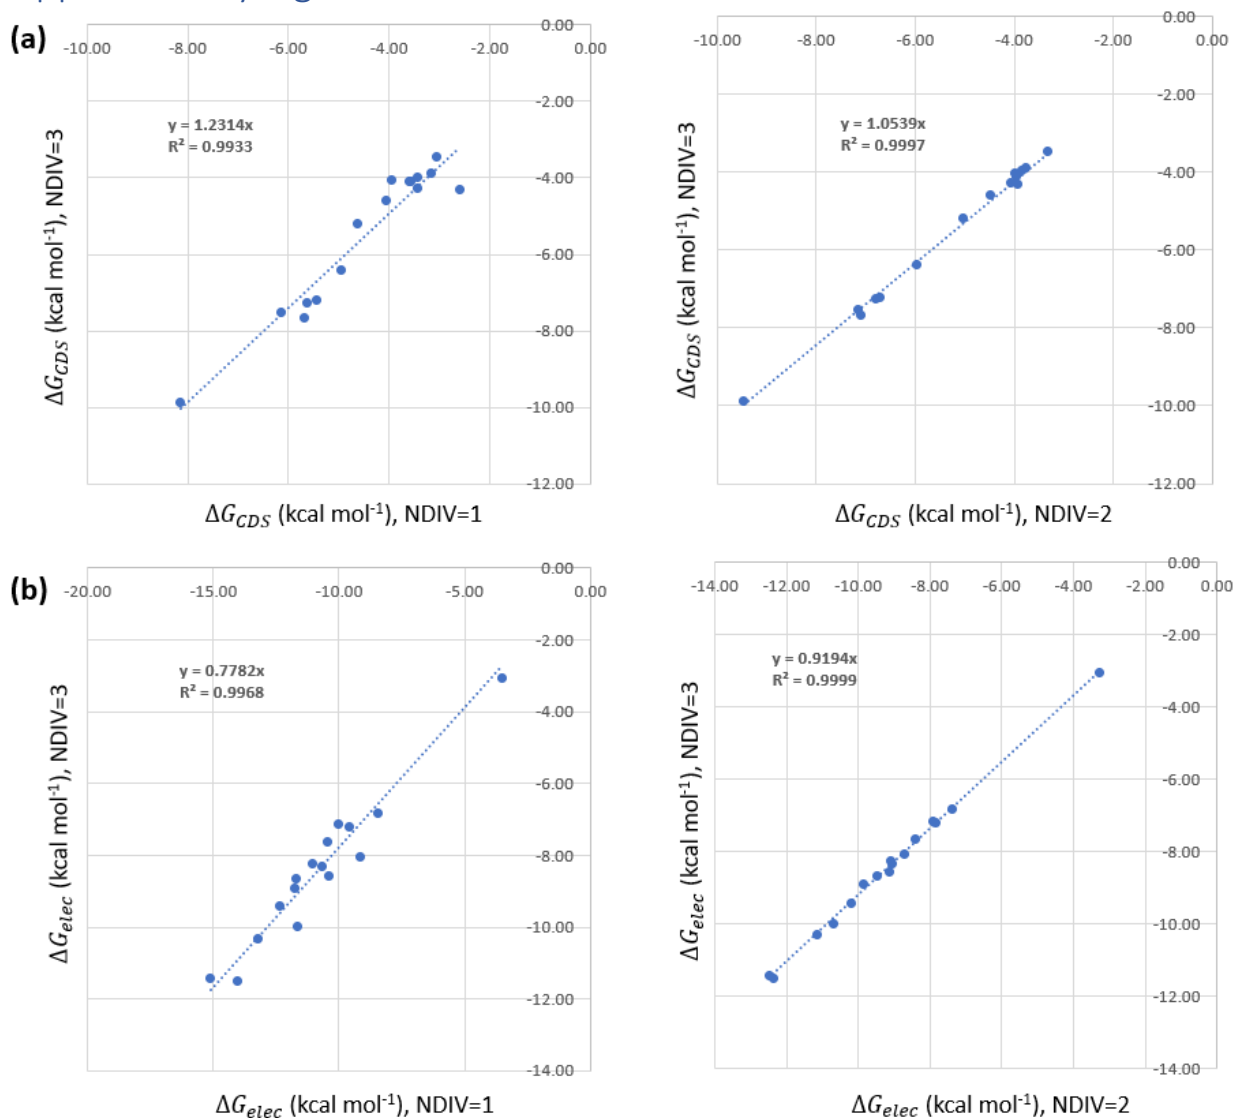

Figure S1. Effects of surface tessellation level (NDIV) on the calculated  $\Delta G_{CDS}$  (a) and  $\Delta G_{elec}$  (b) in chloroform by the SMD. Calculations were performed for sixteen compounds in the PMMA database, corresponding to the sixteen dots in each panel.  $\Delta G_{elec}$  is calculated based on CM5 partial charges. NDIV=3 is used as the reference, and NDIV=1 and 2 are tested. Clearly, NDIV=1 vs 3 shows significant scatter indicating insufficient digitization by 1, whereas NDIV=2 vs 3 yields good linearity with a slope close to 1, for both  $\Delta G_{CDS}$  and  $\Delta G_{elec}$ . Note that increasing NDIV by one increases the computational time by four-fold. Therefore, NDIV=2 was chosen in this work.

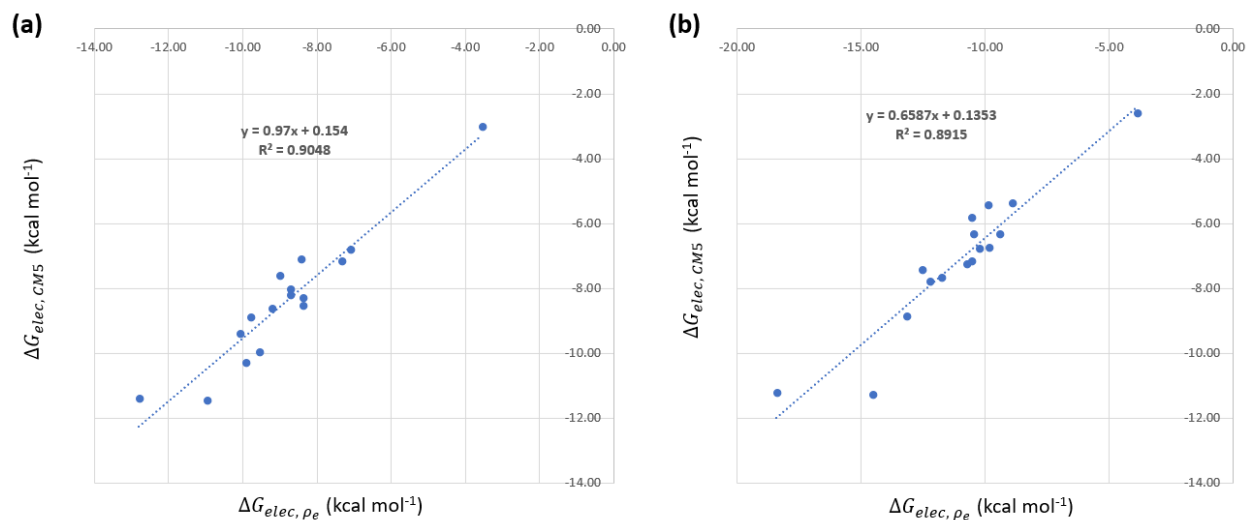

Figure S2. Comparison of  $\Delta G_{elec}$  calculated using CM5 partial charges ( $\Delta G_{elec, CM5}$ ) and electron density  $\rho_e$  ( $\Delta G_{elec, \rho_e}$ ) for sixteen compounds in chloroform (a) and DMSO (b).  $\Delta G_{elec, CM5}$  is calculated by adding up the electrostatic free energies (inside the parentheses of Eq (3)) of all electrostatic tesserae.  $\Delta G_{elec, \rho_e}$  is obtained by:  $G_{SMD} - G_{vacuo} - \Delta G_{CDS}$ , where  $G_{SMD}$  and  $G_{vacuo}$  are the single-point DFT (B3LYP-GD2/6-311G\*\*) energies in solution (SMD) and in vacuo, respectively, and  $\Delta G_{CDS}$  is the CDS component of the solvation free energy. Panel (a) shows that  $\Delta G_{elec, CM5}$  and  $\Delta G_{elec, \rho_e}$  agree well in chloroform with differences within 1 kcal mol<sup>-1</sup>, whereas panel (b) shows that in DMSO  $\Delta G_{elec, CM5}$  systematically under-estimates the magnitude of  $\Delta G_{elec}$  due to point charge approximation, albeit displaying a linear correlation.



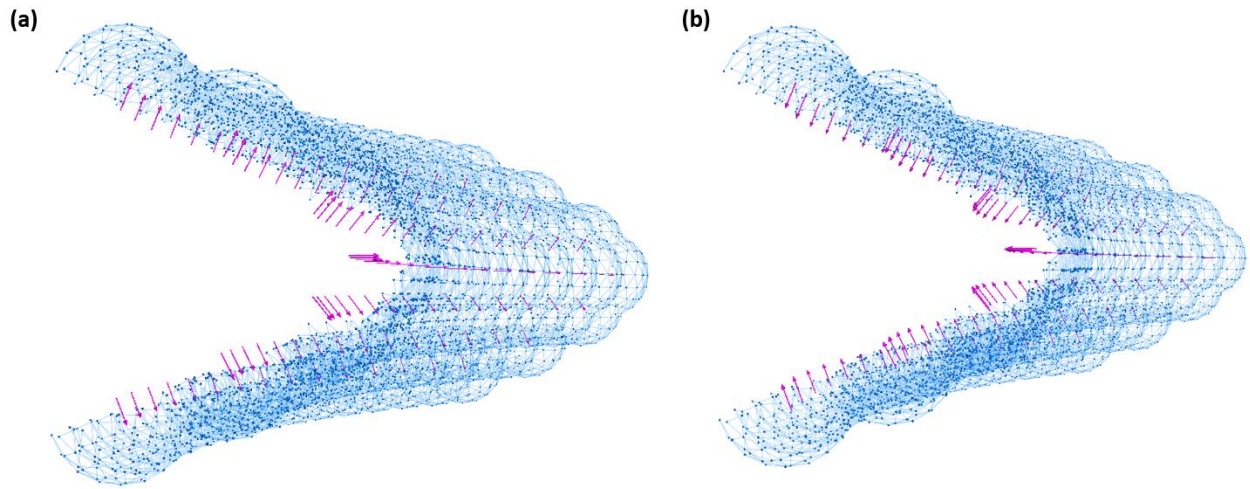

Figure S3. The vectorial direction of pseudoatomic point dipoles in the medium model. The point dipole  $m\vec{n}_p$  is located at the center of each pseudoatom. The magnitude of a point dipole is controlled by  $m$ , which is a fitting variable and is the same for all pseudoatoms. The point dipole aligns along the normal vector of the medium surface, pointing either outwards (positive charges on the surface and negative charges in the center) if  $m > 0$  as shown in (a), or inwards if  $m < 0$  as shown in (b).

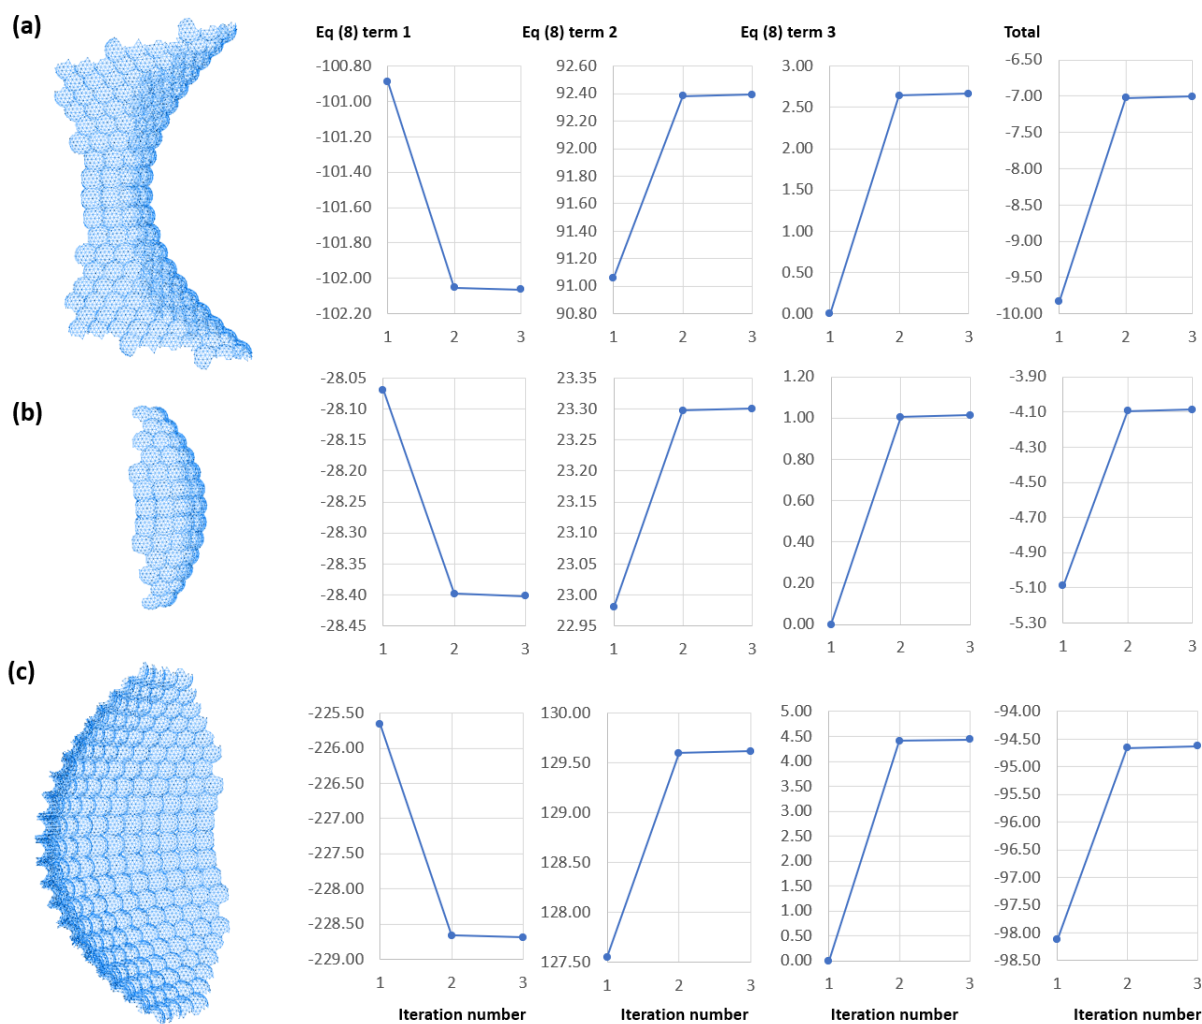

Figure S4. Convergence of SCF calculation for the electrostatic component of the medium solvation free energy  $\Delta G_{elec,m}$  (Eq (8)) by the PCM. (a) A saddle-like medium structure with  $k_x = 0.5$ ,  $k_z = -0.1$ . (b) A hump-like medium structure with  $k_x = 0.5$ ,  $k_z = 0.1$ . (c) A basin-like medium structure with  $k_x = -0.1$ ,  $k_z = -0.1$ . The pseudoatomic representation of each medium structure is shown on the left, followed by the convergence plots for the first (interaction between point dipoles and surface polarization charges), second (self-interaction of surface polarization charges), and third (change in self-interaction of point dipoles) energy terms in Eq (8), and finally the electrostatic free energy of solvation  $\Delta G_{elec,m}$ . In all cases, SCF calculation converges after 3 iterations. Also note that a concave medium surface (negative curvature) requires considering a larger pseudoatomic surface than a convex surface, because it can have a more extensive interaction with the solute. For example, (c) has two negative curvatures making it more capable of interacting with the solute, therefore demanding a more extensive surface model. In contrast, for (b) only a small surface region needs to be considered because any surface beyond the displayed region is unable to interact with the solute. The size of the pseudoatomic model is determined as described in the main text. Other parameters used for the calculations are:  $m = 0.1 [e] \text{ \AA}$ ,  $\alpha_m = 0.02 \text{ \AA}^3$ ,  $r_{MEB} = 5.9 \text{ \AA}$  (strychine),  $\epsilon_r = 46.7$  (DMSO).

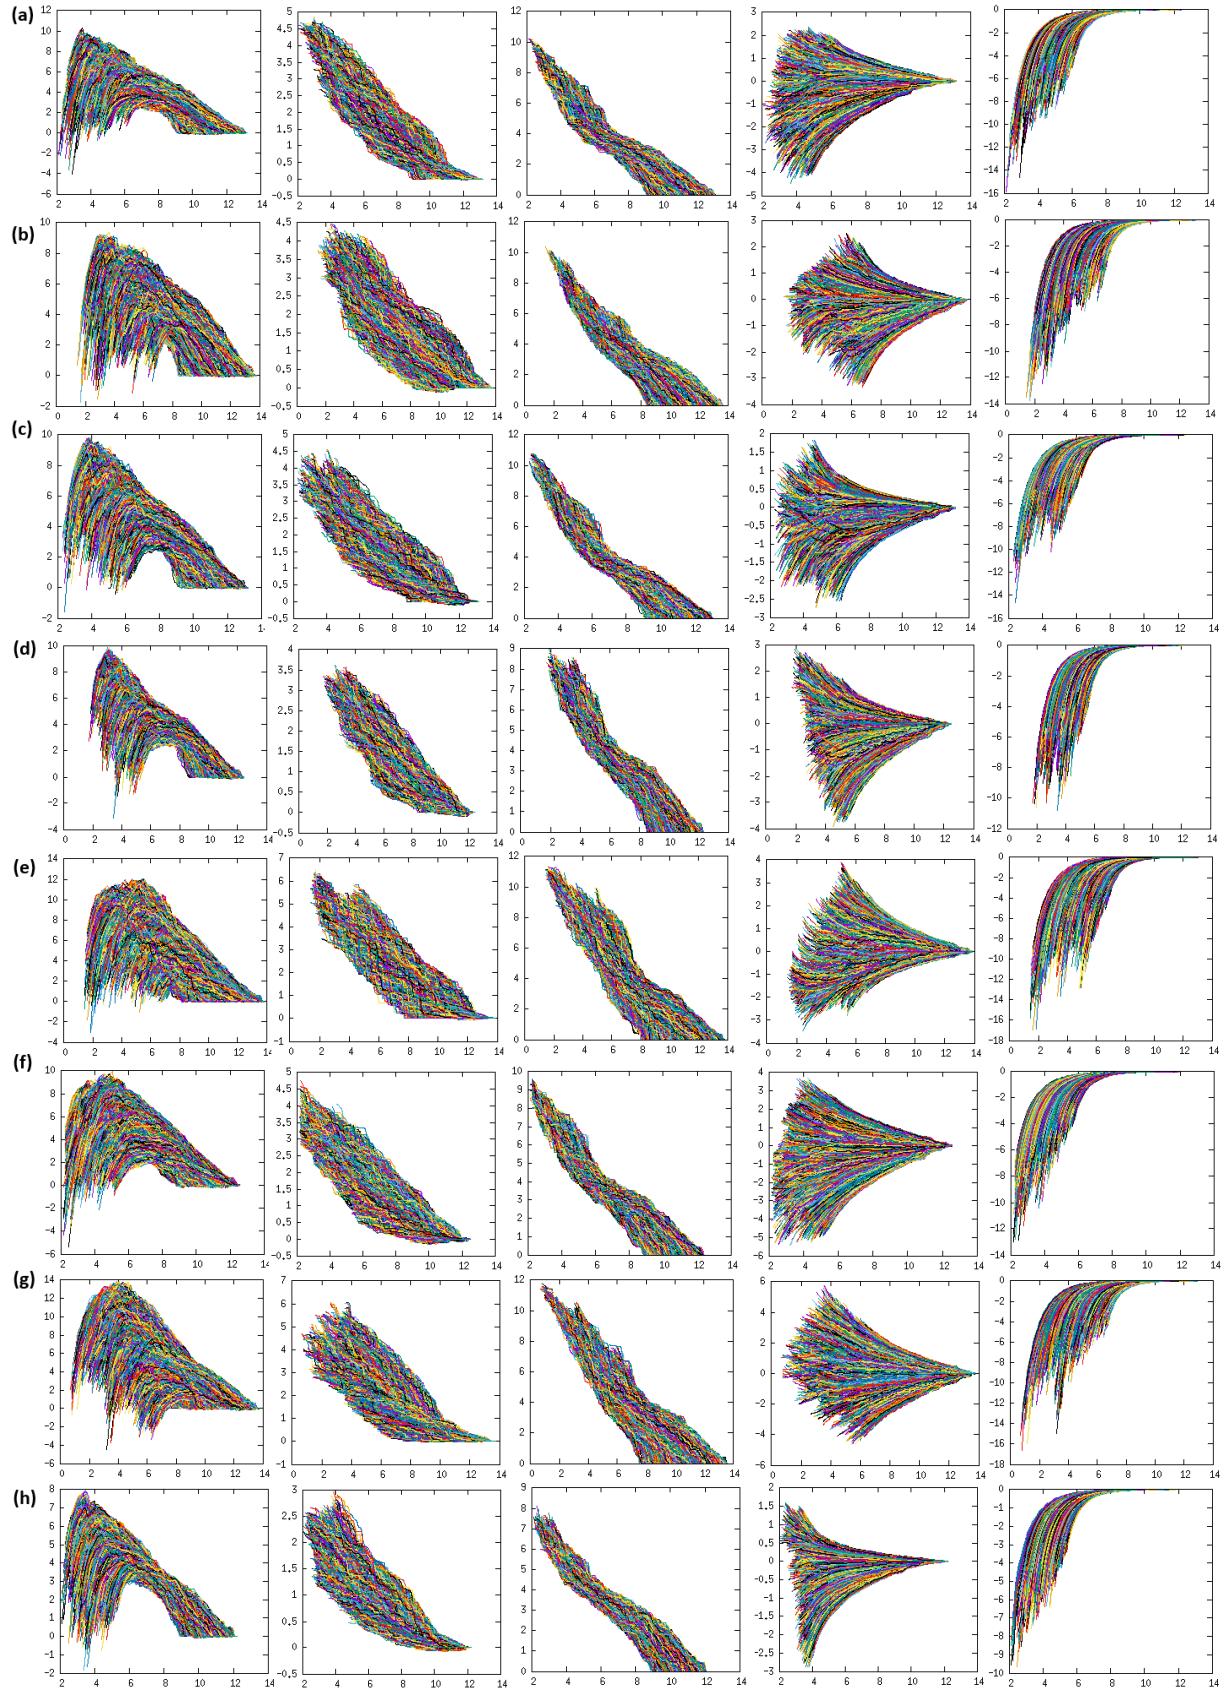

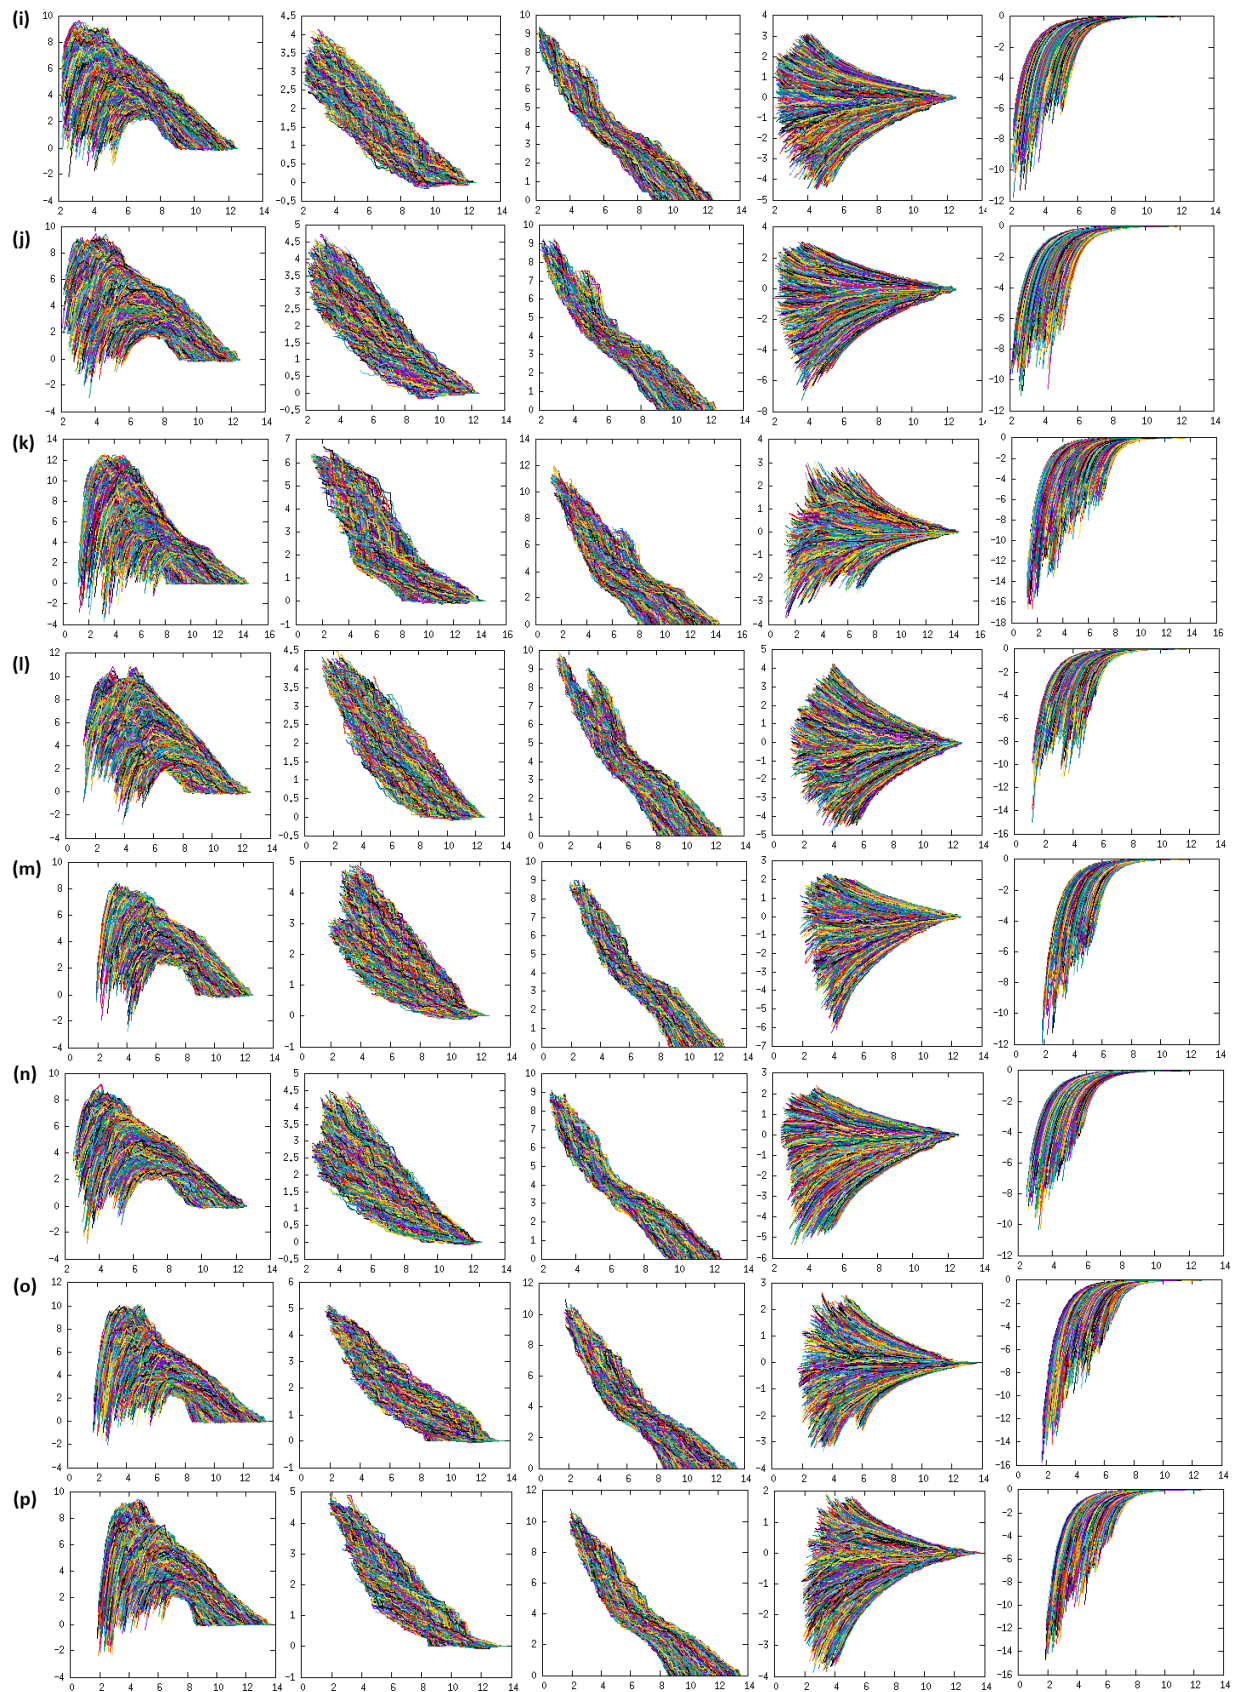

Figure S5. PES projections on the  $r$ -energy plane generated from optimized P1B FP's for PMMA/chloroform. (a)-(p) for compounds **1-16**, respectively. Column 1: the total Gibbs free energy of the system:  $\Delta G(\mathcal{Q}, r)$ ; column 2: desolvation free energy of solute:  $\Delta\Delta G_{sol,s}$ ; column 3: desolvation free energy of medium:  $\Delta\Delta G_{sol,m}$ ; column 4: solute-medium electrostatic interaction energy:  $\Delta\Delta G_{elec,s/m} + \Delta\Delta G_{elec,m/m}$ ; column 5: solute-medium dispersion interaction:  $\Delta\Delta G_{disp,s/m}$ . The X-axis is the solute-medium distance  $r$  in Å. The Y-axis is the energy in kcal mol<sup>-1</sup>.

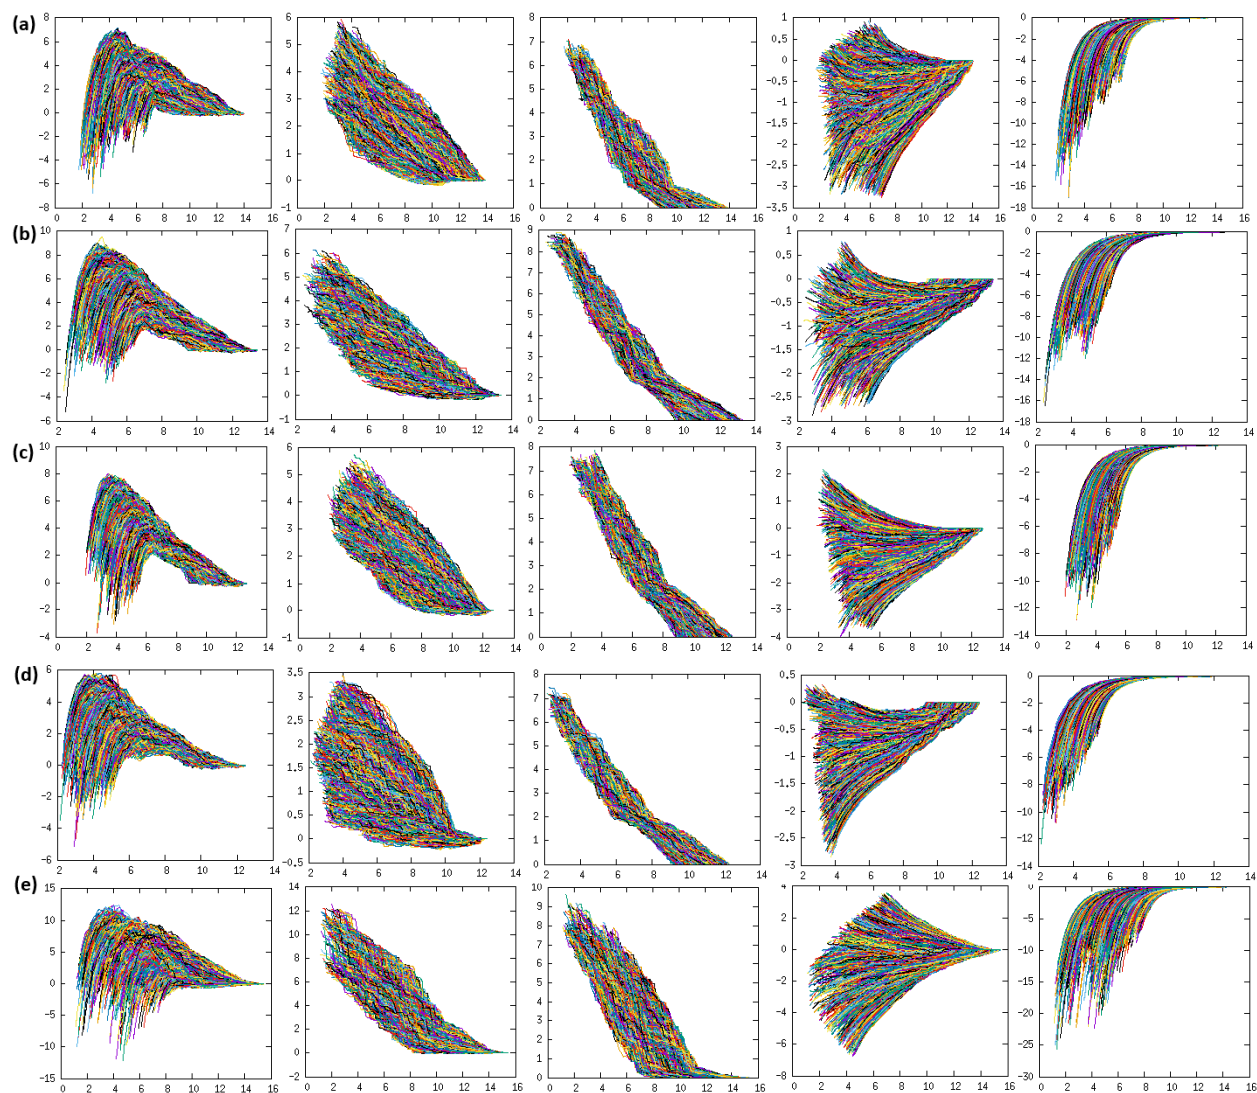

Figure S6. PES projections on the  $r$ -energy plane generated from optimized P1B FP's for poly-HEMA/DMSO. (a)-(e) for compounds **2**, **3**, **4**, **8**, and **17**, respectively. Column 1: the total Gibbs free energy of the system:  $\Delta G(\Omega, r)$ ; column 2: desolvation free energy of solute:  $\Delta\Delta G_{sol,s}$ ; column 3: desolvation free energy of medium:  $\Delta\Delta G_{sol,m}$ ; column 4: solute-medium electrostatic interaction energy:  $\Delta\Delta G_{elec,s/m} + \Delta\Delta G_{elec,m/m}$ ; column 5: solute-medium dispersion interaction:  $\Delta\Delta G_{disp,s/m}$ . The X-axis is the solute-medium distance  $r$  in Å. The Y-axis is the energy in kcal mol<sup>-1</sup>.

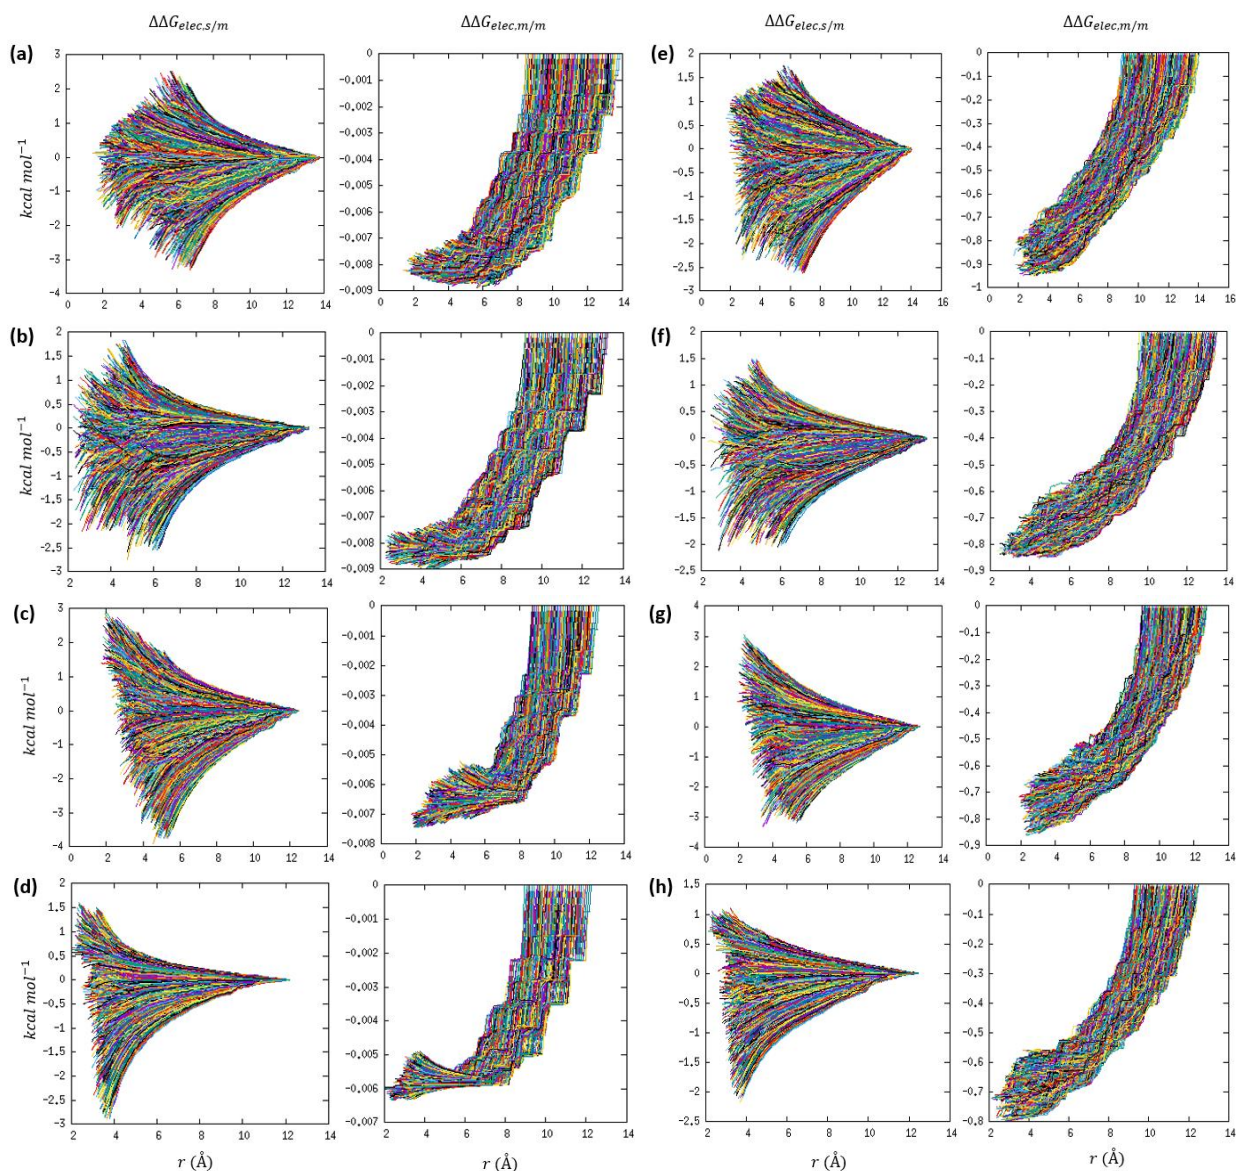

Figure S7. 2-D  $r$ -energy PES of Coulomb interaction  $\Delta\Delta G_{elec,s/m}$  and medium self-interaction  $\Delta\Delta G_{elec,m/m}$ . (a)-(d):  $\Delta\Delta G_{elec,s/m}$  (left) and  $\Delta\Delta G_{elec,m/m}$  (right) for compounds **2**, **3**, **4**, and **8**, respectively, in PMMA/chloroform. (e)-(h):  $\Delta\Delta G_{elec,s/m}$  (left) and  $\Delta\Delta G_{elec,m/m}$  (right) for compounds **2**, **3**, **4**, and **8**, respectively, in poly-HEMA/DMSO. Notice that  $\Delta\Delta G_{elec,s/m}$  has a similar distribution of positive and negative energies for the same compound in the two different alignment medium, whereas  $\Delta\Delta G_{elec,m/m}$  drops to substantially more negative values at short solute-medium distances in poly-HEMA/DMSO than PMMA/chloroform.

## Solute Geometry and Predetermined Model Parameters

Table S1. Solute parameters for the sixteen compounds measured in PMMA/chloroform

|                |     | X      | Y      | Z      | Coulomb<br>$R$ (Å) | Bondi<br>$R$ (Å) | Grimme<br>D2 $R$ (Å) | CM5 $pQ$<br>([e]) | $\gamma$ (cal mol <sup>-1</sup><br>Å <sup>-2</sup> ) | $C_6^m$<br>(J nm <sup>6</sup><br>mol <sup>-1</sup> ) |
|----------------|-----|--------|--------|--------|--------------------|------------------|----------------------|-------------------|------------------------------------------------------|------------------------------------------------------|
| strychnine (1) | C1  | 2.359  | 0.439  | 0.172  | 1.85               | 1.7              | 1.452                | 0.091             | -80.92                                               | 1.75                                                 |
|                | C2  | 2.013  | -0.913 | 0.023  | 1.85               | 1.7              | 1.452                | -0.017            | -83.44                                               | 1.75                                                 |
|                | C3  | 2.989  | -1.845 | -0.316 | 1.85               | 1.7              | 1.452                | -0.099            | -28.04                                               | 1.75                                                 |
|                | C4  | 4.307  | -1.417 | -0.512 | 1.85               | 1.7              | 1.452                | -0.114            | -27.88                                               | 1.75                                                 |
|                | C5  | 4.636  | -0.069 | -0.353 | 1.85               | 1.7              | 1.452                | -0.103            | -27.90                                               | 1.75                                                 |
|                | C6  | 3.671  | 0.882  | -0.005 | 1.85               | 1.7              | 1.452                | -0.109            | -27.92                                               | 1.75                                                 |
|                | C7  | 0.553  | -1.128 | 0.365  | 1.85               | 1.7              | 1.452                | 0.007             | -124.32                                              | 1.75                                                 |
|                | N8  | 1.209  | 1.198  | 0.488  | 1.89               | 1.6              | 1.397                | -0.274            | 2.62                                                 | 1.23                                                 |
|                | C9  | 1.082  | 2.563  | 0.314  | 1.85               | 1.7              | 1.452                | 0.260             | -18.04                                               | 1.75                                                 |
|                | O10 | 2.038  | 3.317  | 0.194  | 2.02               | 1.5              | 1.342                | -0.358            | -2.42                                                | 0.7                                                  |
|                | C11 | 0.001  | 0.336  | 0.415  | 1.85               | 1.7              | 1.452                | 0.027             | -64.26                                               | 1.75                                                 |
|                | C12 | -0.359 | 3.075  | 0.317  | 1.85               | 1.7              | 1.452                | -0.145            | -16.78                                               | 1.75                                                 |
|                | C13 | -1.42  | 2.204  | -0.412 | 1.85               | 1.7              | 1.452                | 0.021             | -16.11                                               | 1.75                                                 |
|                | C14 | -0.814 | 0.836  | -0.793 | 1.85               | 1.7              | 1.452                | -0.080            | -71.04                                               | 1.75                                                 |
|                | O15 | -2.523 | 2.142  | 0.488  | 2.02               | 1.5              | 1.342                | -0.270            | 2.69                                                 | 0.7                                                  |
|                | C16 | -3.714 | 1.536  | -0.023 | 1.85               | 1.7              | 1.452                | -0.053            | 36.14                                                | 1.75                                                 |
|                | C17 | -3.717 | 0.035  | 0.139  | 1.85               | 1.7              | 1.452                | -0.120            | -25.58                                               | 1.75                                                 |
|                | C18 | -2.821 | -0.767 | -0.448 | 1.85               | 1.7              | 1.452                | -0.017            | -80.21                                               | 1.75                                                 |
|                | C19 | -2.721 | -2.251 | -0.155 | 1.85               | 1.7              | 1.452                | -0.057            | -13.05                                               | 1.75                                                 |
|                | C20 | -1.739 | -0.243 | -1.393 | 1.85               | 1.7              | 1.452                | -0.072            | -71.69                                               | 1.75                                                 |
|                | C21 | -0.82  | -1.405 | -1.817 | 1.85               | 1.7              | 1.452                | -0.149            | -17.33                                               | 1.75                                                 |
|                | C22 | -0.269 | -2.079 | -0.558 | 1.85               | 1.7              | 1.452                | 0.015             | -64.62                                               | 1.75                                                 |
|                | C23 | 0.366  | -1.839 | 1.73   | 1.85               | 1.7              | 1.452                | -0.147            | -16.90                                               | 1.75                                                 |
|                | C24 | -1.099 | -2.281 | 1.703  | 1.85               | 1.7              | 1.452                | -0.063            | -12.24                                               | 1.75                                                 |
|                | N25 | -1.368 | -2.619 | 0.293  | 1.89               | 1.6              | 1.397                | -0.366            | -31.50                                               | 1.23                                                 |
|                | H26 | 2.734  | -2.896 | -0.426 | 1.20               | 1.2              | 1.001                | 0.104             | -35.49                                               | 0.14                                                 |
|                | H27 | 5.075  | -2.137 | -0.781 | 1.20               | 1.2              | 1.001                | 0.100             | -35.50                                               | 0.14                                                 |
|                | H28 | 5.663  | 0.255  | -0.502 | 1.20               | 1.2              | 1.001                | 0.102             | -35.49                                               | 0.14                                                 |
|                | H29 | 3.914  | 1.928  | 0.114  | 1.20               | 1.2              | 1.001                | 0.101             | -35.61                                               | 0.14                                                 |
|                | H30 | -0.601 | 0.479  | 1.319  | 1.20               | 1.2              | 1.001                | 0.109             | -35.34                                               | 0.14                                                 |
|                | H31 | -0.327 | 4.093  | -0.077 | 1.20               | 1.2              | 1.001                | 0.106             | -35.40                                               | 0.14                                                 |
|                | H32 | -0.687 | 3.148  | 1.362  | 1.20               | 1.2              | 1.001                | 0.113             | -35.29                                               | 0.14                                                 |
|                | H33 | -1.749 | 2.707  | -1.336 | 1.20               | 1.2              | 1.001                | 0.099             | -35.21                                               | 0.14                                                 |
|                | H34 | -0.086 | 1.061  | -1.587 | 1.20               | 1.2              | 1.001                | 0.103             | -35.24                                               | 0.14                                                 |
|                | H35 | -3.853 | 1.827  | -1.078 | 1.20               | 1.2              | 1.001                | 0.097             | -35.19                                               | 0.14                                                 |
|                | H36 | -4.534 | 1.982  | 0.549  | 1.20               | 1.2              | 1.001                | 0.106             | -35.35                                               | 0.14                                                 |
|                | H37 | -4.459 | -0.393 | 0.812  | 1.20               | 1.2              | 1.001                | 0.093             | -35.45                                               | 0.14                                                 |
|                | H38 | -2.974 | -2.843 | -1.045 | 1.20               | 1.2              | 1.001                | 0.099             | -35.28                                               | 0.14                                                 |
|                | H39 | -3.433 | -2.546 | 0.623  | 1.20               | 1.2              | 1.001                | 0.108             | -35.34                                               | 0.14                                                 |
|                | H40 | -2.223 | 0.187  | -2.284 | 1.20               | 1.2              | 1.001                | 0.100             | -35.22                                               | 0.14                                                 |



estrone (2)

|     |        |        |        |       |      |       |        |         |      |
|-----|--------|--------|--------|-------|------|-------|--------|---------|------|
| H41 | 0.01   | -1.034 | -2.429 | 1.20  | 1.2  | 1.001 | 0.095  | -35.33  | 0.14 |
| H42 | -1.358 | -2.137 | -2.43  | 1.20  | 1.2  | 1.001 | 0.095  | -35.33  | 0.14 |
| H43 | 0.389  | -2.909 | -0.854 | 1.20  | 1.2  | 1.001 | 0.095  | -35.25  | 0.14 |
| H44 | 0.606  | -1.192 | 2.58   | 1.20  | 1.2  | 1.001 | 0.095  | -35.35  | 0.14 |
| H45 | 1.032  | -2.708 | 1.774  | 1.20  | 1.2  | 1.001 | 0.092  | -35.33  | 0.14 |
| H46 | -1.287 | -3.144 | 2.354  | 1.20  | 1.2  | 1.001 | 0.092  | -35.30  | 0.14 |
| H47 | -1.751 | -1.462 | 2.05   | 1.20  | 1.2  | 1.001 | 0.086  | -35.20  | 0.14 |
| C1  | -0.369 | -1.771 | -0.084 | 1.85  | 1.7  | 1.452 | -0.153 | -16.37  | 1.75 |
| C2  | 0.279  | -0.436 | -0.526 | 1.85  | 1.7  | 1.452 | -0.073 | -70.74  | 1.75 |
| C3  | -0.465 | 0.795  | 0.06   | 1.85  | 1.7  | 1.452 | -0.079 | -71.57  | 1.75 |
| C4  | -1.945 | 0.683  | -0.309 | 1.85  | 1.7  | 1.452 | -0.077 | -71.28  | 1.75 |
| C5  | -2.596 | -0.607 | 0.251  | 1.85  | 1.7  | 1.452 | -0.015 | -125.46 | 1.75 |
| C6  | -1.89  | -1.83  | -0.345 | 1.85  | 1.7  | 1.452 | -0.152 | -17.08  | 1.75 |
| C7  | 1.787  | -0.36  | -0.267 | 1.85  | 1.7  | 1.452 | -0.031 | -82.08  | 1.75 |
| C8  | 2.421  | 0.874  | -0.004 | 1.85  | 1.7  | 1.452 | -0.015 | -82.75  | 1.75 |
| C9  | 1.636  | 2.17   | 0.114  | 1.85  | 1.7  | 1.452 | -0.148 | -18.31  | 1.75 |
| C10 | 0.212  | 2.077  | -0.437 | 1.85  | 1.7  | 1.452 | -0.154 | -17.75  | 1.75 |
| C11 | 2.595  | -1.503 | -0.34  | 1.85  | 1.7  | 1.452 | -0.105 | -27.94  | 1.75 |
| C12 | 3.974  | -1.454 | -0.153 | 1.85  | 1.7  | 1.452 | -0.131 | -28.10  | 1.75 |
| C13 | 4.587  | -0.227 | 0.111  | 1.85  | 1.7  | 1.452 | 0.072  | -28.05  | 1.75 |
| C14 | 3.805  | 0.925  | 0.181  | 1.85  | 1.7  | 1.452 | -0.123 | -28.03  | 1.75 |
| C15 | -2.952 | 1.799  | 0.038  | 1.85  | 1.7  | 1.452 | -0.155 | -16.54  | 1.75 |
| C16 | -4.316 | 1.123  | -0.234 | 1.85  | 1.7  | 1.452 | -0.153 | -16.58  | 1.75 |
| C17 | -4.058 | -0.395 | -0.156 | 1.85  | 1.7  | 1.452 | 0.189  | -17.22  | 1.75 |
| O18 | -4.876 | -1.261 | -0.381 | 2.024 | 1.52 | 1.342 | -0.331 | -2.55   | 0.7  |
| C19 | -2.616 | -0.685 | 1.801  | 1.85  | 1.7  | 1.452 | -0.226 | 38.02   | 1.75 |
| H20 | -0.368 | 0.773  | 1.156  | 1.2   | 1.2  | 1.001 | 0.089  | -35.24  | 0.14 |
| H21 | 0.137  | -0.372 | -1.619 | 1.2   | 1.2  | 1.001 | 0.087  | -35.17  | 0.14 |
| H22 | -1.983 | 0.58   | -1.408 | 1.2   | 1.2  | 1.001 | 0.090  | -35.17  | 0.14 |
| O23 | 5.935  | -0.094 | 0.305  | 2.024 | 1.52 | 1.342 | -0.401 | 1.05    | 0.7  |
| H24 | -3.103 | 0.182  | 2.259  | 1.2   | 1.2  | 1.001 | 0.087  | -35.35  | 0.14 |
| H25 | -3.172 | -1.576 | 2.107  | 1.2   | 1.2  | 1.001 | 0.087  | -35.36  | 0.14 |
| H26 | -1.61  | -0.755 | 2.221  | 1.2   | 1.2  | 1.001 | 0.090  | -35.39  | 0.14 |
| H27 | -0.158 | -1.939 | 0.979  | 1.2   | 1.2  | 1.001 | 0.082  | -35.31  | 0.14 |
| H28 | 0.096  | -2.606 | -0.617 | 1.2   | 1.2  | 1.001 | 0.088  | -35.36  | 0.14 |
| H29 | -2.074 | -1.854 | -1.427 | 1.2   | 1.2  | 1.001 | 0.084  | -35.29  | 0.14 |
| H30 | -2.309 | -2.758 | 0.059  | 1.2   | 1.2  | 1.001 | 0.087  | -35.34  | 0.14 |
| H31 | 2.188  | 2.978  | -0.382 | 1.2   | 1.2  | 1.001 | 0.091  | -35.31  | 0.14 |
| H32 | 1.588  | 2.452  | 1.176  | 1.2   | 1.2  | 1.001 | 0.089  | -35.25  | 0.14 |
| H33 | 0.229  | 2.075  | -1.536 | 1.2   | 1.2  | 1.001 | 0.083  | -35.27  | 0.14 |
| H34 | -0.357 | 2.963  | -0.133 | 1.2   | 1.2  | 1.001 | 0.087  | -35.33  | 0.14 |
| H35 | -2.807 | 2.698  | -0.567 | 1.2   | 1.2  | 1.001 | 0.087  | -35.38  | 0.14 |
| H36 | -2.862 | 2.1    | 1.088  | 1.2   | 1.2  | 1.001 | 0.085  | -35.33  | 0.14 |
| H37 | -4.689 | 1.344  | -1.241 | 1.2   | 1.2  | 1.001 | 0.103  | -35.32  | 0.14 |
| H38 | -5.113 | 1.408  | 0.46   | 1.2   | 1.2  | 1.001 | 0.102  | -35.35  | 0.14 |

|                |     |        |        |        |       |      |       |        |        |      |
|----------------|-----|--------|--------|--------|-------|------|-------|--------|--------|------|
|                | H39 | 2.146  | -2.468 | -0.551 | 1.2   | 1.2  | 1.001 | 0.100  | -35.53 | 0.14 |
|                | H40 | 4.568  | -2.363 | -0.216 | 1.2   | 1.2  | 1.001 | 0.103  | -35.48 | 0.14 |
|                | H41 | 4.297  | 1.873  | 0.383  | 1.2   | 1.2  | 1.001 | 0.103  | -35.49 | 0.14 |
|                | H42 | 6.35   | -0.963 | 0.224  | 1.2   | 1.2  | 1.001 | 0.358  | -19.96 | 0.14 |
| retrorsine (3) | C1  | -2.234 | -0.125 | -1.162 | 1.85  | 1.7  | 1.452 | 0.025  | -16.96 | 1.75 |
|                | C2  | -3.684 | 0.344  | -0.978 | 1.85  | 1.7  | 1.452 | -0.152 | -17.39 | 1.75 |
|                | C3  | -4.12  | -0.378 | 0.305  | 1.85  | 1.7  | 1.452 | -0.059 | -12.54 | 1.75 |
|                | N4  | -3.438 | -1.675 | 0.239  | 1.89  | 1.55 | 1.397 | -0.364 | -32.41 | 1.23 |
|                | C5  | -2.344 | -1.613 | -0.762 | 1.85  | 1.7  | 1.452 | 0.018  | -66.52 | 1.75 |
|                | C6  | -2.928 | -2.238 | 1.494  | 1.85  | 1.7  | 1.452 | -0.051 | -13.94 | 1.75 |
|                | C7  | -1.53  | -2.672 | 1.155  | 1.85  | 1.7  | 1.452 | -0.079 | -25.93 | 1.75 |
|                | C8  | -1.188 | -2.321 | -0.088 | 1.85  | 1.7  | 1.452 | -0.024 | -81.74 | 1.75 |
|                | O9  | -1.345 | 0.537  | -0.228 | 2.024 | 1.52 | 1.342 | -0.190 | 0.71   | 0.7  |
|                | C10 | -1.05  | 1.841  | -0.478 | 1.85  | 1.7  | 1.452 | 0.262  | 35.65  | 1.75 |
|                | C11 | -0.062 | 2.37   | 0.516  | 1.85  | 1.7  | 1.452 | -0.028 | -81.41 | 1.75 |
|                | O12 | -1.534 | 2.463  | -1.405 | 2.024 | 1.52 | 1.342 | -0.329 | -2.50  | 0.7  |
|                | C13 | -0.142 | 3.636  | 0.965  | 1.85  | 1.7  | 1.452 | -0.068 | -25.81 | 1.75 |
|                | C14 | -1.146 | 4.696  | 0.626  | 1.85  | 1.7  | 1.452 | -0.228 | 35.69  | 1.75 |
|                | C15 | 1.03   | 1.418  | 0.955  | 1.85  | 1.7  | 1.452 | -0.154 | -17.35 | 1.75 |
|                | C16 | 2.024  | 1.102  | -0.2   | 1.85  | 1.7  | 1.452 | -0.078 | -70.24 | 1.75 |
|                | C17 | 0.089  | -2.691 | -0.775 | 1.85  | 1.7  | 1.452 | -0.034 | 35.59  | 1.75 |
|                | O18 | 1.043  | -1.586 | -0.853 | 2.024 | 1.52 | 1.342 | -0.188 | -0.15  | 0.7  |
|                | C19 | 1.797  | -1.384 | 0.232  | 1.85  | 1.7  | 1.452 | 0.264  | 37.35  | 1.75 |
|                | C20 | 2.79   | -0.222 | 0.066  | 1.85  | 1.7  | 1.452 | 0.077  | -70.80 | 1.75 |
|                | O21 | 1.727  | -2.032 | 1.261  | 2.024 | 1.52 | 1.342 | -0.318 | -2.49  | 0.7  |
|                | C22 | 2.973  | 2.288  | -0.426 | 1.85  | 1.7  | 1.452 | -0.235 | 37.27  | 1.75 |
|                | O23 | 3.544  | -0.145 | 1.273  | 2.024 | 1.52 | 1.342 | -0.432 | 2.69   | 0.7  |
|                | C24 | 3.785  | -0.595 | -1.052 | 1.85  | 1.7  | 1.452 | -0.063 | 37.57  | 1.75 |
|                | O25 | 4.413  | -1.829 | -0.754 | 2.024 | 1.52 | 1.342 | -0.462 | 2.69   | 0.7  |
|                | H26 | -2.628 | -2.153 | -1.683 | 1.2   | 1.2  | 1.001 | 0.099  | -35.16 | 0.14 |
|                | H27 | -1.92  | 4.342  | -0.052 | 1.2   | 1.2  | 1.001 | 0.088  | -35.47 | 0.14 |
|                | H28 | -1.607 | 5.086  | 1.542  | 1.2   | 1.2  | 1.001 | 0.092  | -35.30 | 0.14 |
|                | H29 | -0.644 | 5.546  | 0.147  | 1.2   | 1.2  | 1.001 | 0.095  | -35.30 | 0.14 |
|                | H30 | 3.684  | 2.37   | 0.401  | 1.2   | 1.2  | 1.001 | 0.083  | -35.37 | 0.14 |
|                | H31 | 3.538  | 2.197  | -1.358 | 1.2   | 1.2  | 1.001 | 0.085  | -35.37 | 0.14 |
|                | H32 | 2.401  | 3.219  | -0.483 | 1.2   | 1.2  | 1.001 | 0.082  | -35.36 | 0.14 |
|                | H33 | -4.271 | -0.008 | -1.833 | 1.2   | 1.2  | 1.001 | 0.100  | -35.34 | 0.14 |
|                | H34 | -3.772 | 1.429  | -0.932 | 1.2   | 1.2  | 1.001 | 0.097  | -35.44 | 0.14 |
|                | H35 | -5.209 | -0.495 | 0.364  | 1.2   | 1.2  | 1.001 | 0.092  | -35.31 | 0.14 |
|                | H36 | -3.803 | 0.197  | 1.192  | 1.2   | 1.2  | 1.001 | 0.086  | -35.18 | 0.14 |
|                | H37 | -3.54  | -3.083 | 1.848  | 1.2   | 1.2  | 1.001 | 0.093  | -35.22 | 0.14 |
|                | H38 | -2.928 | -1.494 | 2.31   | 1.2   | 1.2  | 1.001 | 0.096  | -35.17 | 0.14 |
|                | H39 | 0.569  | 0.497  | 1.322  | 1.2   | 1.2  | 1.001 | 0.090  | -35.37 | 0.14 |
|                | H40 | 1.586  | 1.851  | 1.792  | 1.2   | 1.2  | 1.001 | 0.095  | -35.36 | 0.14 |
|                | H41 | -0.082 | -2.955 | -1.822 | 1.2   | 1.2  | 1.001 | 0.120  | -35.38 | 0.14 |

|                |     |        |        |        |       |      |       |        |         |      |
|----------------|-----|--------|--------|--------|-------|------|-------|--------|---------|------|
|                | H42 | 0.576  | -3.523 | -0.264 | 1.2   | 1.2  | 1.001 | 0.117  | -35.42  | 0.14 |
|                | H43 | 4.521  | 0.212  | -1.154 | 1.2   | 1.2  | 1.001 | 0.101  | -35.31  | 0.14 |
|                | H44 | 3.263  | -0.716 | -2.005 | 1.2   | 1.2  | 1.001 | 0.108  | -35.38  | 0.14 |
|                | H45 | -1.853 | 0.035  | -2.173 | 1.2   | 1.2  | 1.001 | 0.111  | -35.40  | 0.14 |
|                | H46 | 1.442  | 0.937  | -1.115 | 1.2   | 1.2  | 1.001 | 0.094  | -35.31  | 0.14 |
|                | H47 | -0.89  | -3.211 | 1.846  | 1.2   | 1.2  | 1.001 | 0.111  | -35.52  | 0.14 |
|                | H48 | 0.614  | 3.934  | 1.692  | 1.2   | 1.2  | 1.001 | 0.103  | -35.43  | 0.14 |
|                | H49 | 3.113  | -0.766 | 1.888  | 1.2   | 1.2  | 1.001 | 0.323  | -19.90  | 0.14 |
|                | H50 | 4.758  | -1.72  | 0.146  | 1.2   | 1.2  | 1.001 | 0.326  | -19.94  | 0.14 |
| aquatolide (4) | C1  | -1.65  | -0.308 | -1.242 | 1.85  | 1.7  | 1.452 | 0.027  | -14.54  | 1.75 |
|                | C2  | -1.996 | -1.149 | 0.044  | 1.85  | 1.7  | 1.452 | -0.008 | -123.61 | 1.75 |
|                | C3  | -0.724 | -0.722 | 0.823  | 1.85  | 1.7  | 1.452 | -0.058 | -69.38  | 1.75 |
|                | C4  | -0.45  | 0.774  | 0.303  | 1.85  | 1.7  | 1.452 | -0.005 | -122.58 | 1.75 |
|                | O5  | -2.279 | 0.994  | -1.123 | 2.024 | 1.52 | 1.342 | -0.207 | 0.99    | 0.7  |
|                | C6  | -1.65  | 1.626  | -0.087 | 1.85  | 1.7  | 1.452 | 0.253  | 36.69   | 1.75 |
|                | O7  | -2.002 | 2.695  | 0.346  | 2.024 | 1.52 | 1.342 | -0.335 | -2.62   | 0.7  |
|                | C8  | 0.429  | -1.145 | -0.141 | 1.85  | 1.7  | 1.452 | -0.078 | -70.89  | 1.75 |
|                | C9  | -0.139 | -0.014 | -1.013 | 1.85  | 1.7  | 1.452 | -0.079 | -72.45  | 1.75 |
|                | C10 | 0.625  | 1.553  | 1.06   | 1.85  | 1.7  | 1.452 | -0.149 | -17.81  | 1.75 |
|                | C11 | 1.718  | 2.165  | 0.177  | 1.85  | 1.7  | 1.452 | -0.144 | -18.71  | 1.75 |
|                | C12 | 1.857  | -1.02  | 0.399  | 1.85  | 1.7  | 1.452 | 0.190  | -18.68  | 1.75 |
|                | C13 | 2.866  | -0.112 | -0.26  | 1.85  | 1.7  | 1.452 | -0.030 | -81.00  | 1.75 |
|                | C14 | 2.764  | 1.224  | -0.364 | 1.85  | 1.7  | 1.452 | -0.087 | -25.51  | 1.75 |
|                | O15 | 2.213  | -1.796 | 1.273  | 2.024 | 1.52 | 1.342 | -0.321 | -2.44   | 0.7  |
|                | C16 | 4.099  | -0.853 | -0.732 | 1.85  | 1.7  | 1.452 | -0.225 | 36.32   | 1.75 |
|                | H17 | 0.381  | -2.167 | -0.527 | 1.2   | 1.2  | 1.001 | 0.108  | -35.37  | 0.14 |
|                | H18 | 0.406  | 0.434  | -1.845 | 1.2   | 1.2  | 1.001 | 0.099  | -35.42  | 0.14 |
|                | H19 | -1.957 | -0.734 | -2.197 | 1.2   | 1.2  | 1.001 | 0.120  | -35.44  | 0.14 |
|                | C20 | -2.098 | -2.655 | -0.265 | 1.85  | 1.7  | 1.452 | -0.228 | 37.50   | 1.75 |
|                | C21 | -3.293 | -0.729 | 0.758  | 1.85  | 1.7  | 1.452 | -0.233 | 37.42   | 1.75 |
|                | H22 | -0.674 | -0.945 | 1.891  | 1.2   | 1.2  | 1.001 | 0.104  | -35.40  | 0.14 |
|                | H23 | 3.853  | -1.602 | -1.495 | 1.2   | 1.2  | 1.001 | 0.088  | -35.30  | 0.14 |
|                | H24 | 4.549  | -1.392 | 0.108  | 1.2   | 1.2  | 1.001 | 0.091  | -35.35  | 0.14 |
|                | H25 | 4.838  | -0.166 | -1.152 | 1.2   | 1.2  | 1.001 | 0.092  | -35.38  | 0.14 |
|                | H26 | -1.999 | -3.248 | 0.651  | 1.2   | 1.2  | 1.001 | 0.089  | -35.33  | 0.14 |
|                | H27 | -1.348 | -3.011 | -0.975 | 1.2   | 1.2  | 1.001 | 0.088  | -35.39  | 0.14 |
|                | H28 | -3.078 | -2.875 | -0.699 | 1.2   | 1.2  | 1.001 | 0.088  | -35.36  | 0.14 |
|                | H29 | -3.485 | -1.421 | 1.585  | 1.2   | 1.2  | 1.001 | 0.088  | -35.34  | 0.14 |
|                | H30 | -4.149 | -0.772 | 0.078  | 1.2   | 1.2  | 1.001 | 0.088  | -35.36  | 0.14 |
|                | H31 | -3.255 | 0.279  | 1.177  | 1.2   | 1.2  | 1.001 | 0.086  | -35.39  | 0.14 |
|                | H32 | 0.106  | 2.358  | 1.591  | 1.2   | 1.2  | 1.001 | 0.097  | -35.34  | 0.14 |
|                | H33 | 1.09   | 0.927  | 1.829  | 1.2   | 1.2  | 1.001 | 0.095  | -35.34  | 0.14 |
|                | H34 | 1.26   | 2.72   | -0.656 | 1.2   | 1.2  | 1.001 | 0.097  | -35.24  | 0.14 |
|                | H35 | 2.25   | 2.931  | 0.758  | 1.2   | 1.2  | 1.001 | 0.100  | -35.27  | 0.14 |
|                | H36 | 3.598  | 1.734  | -0.849 | 1.2   | 1.2  | 1.001 | 0.100  | -35.41  | 0.14 |

|                   |      |        |        |        |      |      |       |        |         |      |
|-------------------|------|--------|--------|--------|------|------|-------|--------|---------|------|
| caulamidine A (5) | C1   | -4.021 | 1.026  | 1.527  | 1.85 | 1.7  | 1.452 | -0.099 | -27.92  | 1.75 |
|                   | C2   | -2.729 | 0.675  | 1.109  | 1.85 | 1.7  | 1.452 | 0.082  | -81.37  | 1.75 |
|                   | C3   | -2.528 | 0.27   | -0.227 | 1.85 | 1.7  | 1.452 | -0.015 | -83.58  | 1.75 |
|                   | C4   | -3.604 | 0.21   | -1.11  | 1.85 | 1.7  | 1.452 | -0.105 | -28.16  | 1.75 |
|                   | C5   | -4.88  | 0.556  | -0.667 | 1.85 | 1.7  | 1.452 | -0.005 | -28.10  | 1.75 |
|                   | C6   | -5.099 | 0.967  | 0.648  | 1.85 | 1.7  | 1.452 | -0.108 | -28.17  | 1.75 |
|                   | N7   | -1.679 | 0.761  | 2.029  | 1.89 | 1.55 | 1.397 | -0.389 | 28.69   | 1.23 |
|                   | C8   | -0.556 | 0.161  | 1.783  | 1.85 | 1.7  | 1.452 | 0.258  | -192.45 | 1.75 |
|                   | C9   | -1.11  | -0.02  | -0.638 | 1.85 | 1.7  | 1.452 | -0.143 | -18.17  | 1.75 |
|                   | C10  | 1.199  | -0.796 | 0.128  | 1.85 | 1.7  | 1.452 | 0.010  | -125.10 | 1.75 |
|                   | C11  | -0.313 | -0.675 | 0.515  | 1.85 | 1.7  | 1.452 | 0.014  | -123.26 | 1.75 |
|                   | C12  | 1.377  | -1.864 | -0.964 | 1.85 | 1.7  | 1.452 | 0.252  | -193.22 | 1.75 |
|                   | N13  | 0.817  | -3.101 | -0.798 | 1.89 | 1.55 | 1.397 | -0.305 | -18.85  | 1.23 |
|                   | C14  | -0.567 | -3.135 | -0.291 | 1.85 | 1.7  | 1.452 | -0.039 | -12.22  | 1.75 |
|                   | C15  | -0.849 | -2.113 | 0.814  | 1.85 | 1.7  | 1.452 | -0.144 | -16.24  | 1.75 |
|                   | N16  | 2.105  | -1.506 | -1.978 | 1.89 | 1.55 | 1.397 | -0.393 | 28.65   | 1.23 |
|                   | C17  | 1.108  | -4.099 | -1.823 | 1.85 | 1.7  | 1.452 | -0.118 | 41.63   | 1.75 |
|                   | CL18 | -6.236 | 0.471  | -1.789 | 2.38 | 1.75 | 1.639 | -0.090 | -35.15  | 5.07 |
|                   | C19  | 2.429  | -0.151 | -1.763 | 1.85 | 1.7  | 1.452 | 0.080  | -81.04  | 1.75 |
|                   | C20  | 1.864  | 0.372  | -0.58  | 1.85 | 1.7  | 1.452 | -0.020 | -83.13  | 1.75 |
|                   | C21  | 2.005  | 1.713  | -0.255 | 1.85 | 1.7  | 1.452 | -0.095 | -28.11  | 1.75 |
|                   | C22  | 2.747  | 2.522  | -1.127 | 1.85 | 1.7  | 1.452 | -0.002 | -27.88  | 1.75 |
|                   | C23  | 3.33   | 2.012  | -2.286 | 1.85 | 1.7  | 1.452 | -0.099 | -27.99  | 1.75 |
|                   | C24  | 3.17   | 0.662  | -2.615 | 1.85 | 1.7  | 1.452 | -0.095 | -28.07  | 1.75 |
|                   | CL25 | 2.94   | 4.231  | -0.742 | 2.38 | 1.75 | 1.639 | -0.086 | -35.15  | 5.07 |
|                   | C26  | 1.967  | -1.212 | 1.41   | 1.85 | 1.7  | 1.452 | -0.021 | -17.21  | 1.75 |
|                   | N27  | 0.409  | 0.151  | 2.764  | 1.89 | 1.55 | 1.397 | -0.291 | -19.30  | 1.23 |
|                   | C28  | 1.811  | -0.17  | 2.509  | 1.85 | 1.7  | 1.452 | -0.046 | -13.51  | 1.75 |
|                   | C29  | 0.158  | 0.89   | 3.999  | 1.85 | 1.7  | 1.452 | -0.119 | 41.70   | 1.75 |
|                   | CL30 | 3.745  | -1.483 | 1.142  | 2.38 | 1.75 | 1.639 | -0.092 | -35.15  | 5.07 |
|                   | H31  | 1.604  | -2.181 | 1.747  | 1.2  | 1.2  | 1.001 | 0.112  | -35.47  | 0.14 |
|                   | H32  | 2.173  | -4.074 | -2.055 | 1.2  | 1.2  | 1.001 | 0.108  | -35.43  | 0.14 |
|                   | H33  | 0.837  | -5.086 | -1.441 | 1.2  | 1.2  | 1.001 | 0.107  | -35.39  | 0.14 |
|                   | H34  | 0.552  | -3.908 | -2.752 | 1.2  | 1.2  | 1.001 | 0.097  | -35.26  | 0.14 |
|                   | H35  | -0.895 | 0.803  | 4.259  | 1.2  | 1.2  | 1.001 | 0.105  | -35.47  | 0.14 |
|                   | H36  | 0.78   | 0.469  | 4.794  | 1.2  | 1.2  | 1.001 | 0.107  | -35.37  | 0.14 |
|                   | H37  | 0.394  | 1.957  | 3.892  | 1.2  | 1.2  | 1.001 | 0.100  | -35.29  | 0.14 |
|                   | H38  | -0.617 | 0.921  | -0.908 | 1.2  | 1.2  | 1.001 | 0.098  | -35.32  | 0.14 |
|                   | H39  | -1.074 | -0.651 | -1.533 | 1.2  | 1.2  | 1.001 | 0.103  | -35.33  | 0.14 |
|                   | H40  | -0.761 | -4.141 | 0.094  | 1.2  | 1.2  | 1.001 | 0.114  | -35.35  | 0.14 |
|                   | H41  | -1.261 | -2.982 | -1.133 | 1.2  | 1.2  | 1.001 | 0.101  | -35.22  | 0.14 |
|                   | H42  | -0.436 | -2.469 | 1.761  | 1.2  | 1.2  | 1.001 | 0.098  | -35.39  | 0.14 |
|                   | H43  | -1.933 | -2.059 | 0.955  | 1.2  | 1.2  | 1.001 | 0.102  | -35.35  | 0.14 |
|                   | H44  | 2.243  | -0.565 | 3.433  | 1.2  | 1.2  | 1.001 | 0.116  | -35.37  | 0.14 |
|                   | H45  | 2.387  | 0.728  | 2.245  | 1.2  | 1.2  | 1.001 | 0.101  | -35.27  | 0.14 |

10-epi-8-  
deoxycumambrin B  
(6)

|     |        |        |        |       |      |       |        |        |      |
|-----|--------|--------|--------|-------|------|-------|--------|--------|------|
| H46 | -4.162 | 1.342  | 2.556  | 1.2   | 1.2  | 1.001 | 0.106  | -35.52 | 0.14 |
| H47 | -3.453 | -0.098 | -2.14  | 1.2   | 1.2  | 1.001 | 0.107  | -35.52 | 0.14 |
| H48 | -6.097 | 1.234  | 0.976  | 1.2   | 1.2  | 1.001 | 0.107  | -35.55 | 0.14 |
| H49 | 1.55   | 2.151  | 0.627  | 1.2   | 1.2  | 1.001 | 0.110  | -35.53 | 0.14 |
| H50 | 3.899  | 2.671  | -2.933 | 1.2   | 1.2  | 1.001 | 0.109  | -35.53 | 0.14 |
| H51 | 3.605  | 0.254  | -3.52  | 1.2   | 1.2  | 1.001 | 0.112  | -35.55 | 0.14 |
| C1  | 1.901  | 0.224  | -0.444 | 1.85  | 1.7  | 1.452 | -0.068 | -67.77 | 1.75 |
| C2  | 0.498  | 0.935  | -0.608 | 1.85  | 1.7  | 1.452 | -0.072 | -70.07 | 1.75 |
| C3  | -0.644 | 0.259  | 0.163  | 1.85  | 1.7  | 1.452 | 0.022  | -16.92 | 1.75 |
| C4  | -1.191 | -1.017 | -0.517 | 1.85  | 1.7  | 1.452 | -0.076 | -73.15 | 1.75 |
| C5  | -0.397 | -2.292 | -0.252 | 1.85  | 1.7  | 1.452 | -0.151 | -17.80 | 1.75 |
| C6  | 1.064  | -2.232 | -0.722 | 1.85  | 1.7  | 1.452 | -0.156 | -16.49 | 1.75 |
| C7  | 1.997  | -1.251 | 0.041  | 1.85  | 1.7  | 1.452 | 0.084  | -69.95 | 1.75 |
| C8  | 2.758  | 1.197  | 0.422  | 1.85  | 1.7  | 1.452 | -0.158 | -17.77 | 1.75 |
| C9  | 2.01   | 2.495  | 0.338  | 1.85  | 1.7  | 1.452 | -0.117 | -25.93 | 1.75 |
| C10 | 0.792  | 2.382  | -0.207 | 1.85  | 1.7  | 1.452 | -0.025 | -80.72 | 1.75 |
| O11 | -1.808 | 1.143  | 0.236  | 2.024 | 1.52 | 1.342 | -0.194 | 0.81   | 0.7  |
| C12 | -2.966 | 0.425  | 0.235  | 1.85  | 1.7  | 1.452 | 0.249  | 35.63  | 1.75 |
| C13 | -2.634 | -1.001 | -0.079 | 1.85  | 1.7  | 1.452 | -0.023 | -81.99 | 1.75 |
| O14 | -4.045 | 0.927  | 0.446  | 2.024 | 1.52 | 1.342 | -0.345 | -2.59  | 0.7  |
| C15 | -3.522 | -1.989 | 0.05   | 1.85  | 1.7  | 1.452 | -0.152 | 30.06  | 1.75 |
| O16 | 1.672  | -1.259 | 1.448  | 2.024 | 1.52 | 1.342 | -0.428 | 2.69   | 0.7  |
| C17 | 3.451  | -1.73  | -0.136 | 1.85  | 1.7  | 1.452 | -0.234 | 37.51  | 1.75 |
| C18 | -0.158 | 3.514  | -0.477 | 1.85  | 1.7  | 1.452 | -0.233 | 35.83  | 1.75 |
| H19 | 2.335  | 0.216  | -1.451 | 1.2   | 1.2  | 1.001 | 0.094  | -35.31 | 0.14 |
| H20 | 0.2    | 0.919  | -1.667 | 1.2   | 1.2  | 1.001 | 0.091  | -35.25 | 0.14 |
| H21 | -0.341 | 0.052  | 1.193  | 1.2   | 1.2  | 1.001 | 0.107  | -35.37 | 0.14 |
| H22 | -1.18  | -0.822 | -1.603 | 1.2   | 1.2  | 1.001 | 0.102  | -35.19 | 0.14 |
| H23 | -0.886 | -3.124 | -0.774 | 1.2   | 1.2  | 1.001 | 0.091  | -35.30 | 0.14 |
| H24 | -0.433 | -2.525 | 0.818  | 1.2   | 1.2  | 1.001 | 0.086  | -35.33 | 0.14 |
| H25 | 1.484  | -3.241 | -0.62  | 1.2   | 1.2  | 1.001 | 0.087  | -35.29 | 0.14 |
| H26 | 1.106  | -1.997 | -1.795 | 1.2   | 1.2  | 1.001 | 0.089  | -35.26 | 0.14 |
| H27 | 3.781  | 1.286  | 0.036  | 1.2   | 1.2  | 1.001 | 0.084  | -35.31 | 0.14 |
| H28 | 2.837  | 0.841  | 1.457  | 1.2   | 1.2  | 1.001 | 0.084  | -35.30 | 0.14 |
| H29 | 2.431  | 3.435  | 0.688  | 1.2   | 1.2  | 1.001 | 0.094  | -35.48 | 0.14 |
| H30 | -3.272 | -3.023 | -0.168 | 1.2   | 1.2  | 1.001 | 0.107  | -35.51 | 0.14 |
| H31 | -4.532 | -1.769 | 0.383  | 1.2   | 1.2  | 1.001 | 0.107  | -35.51 | 0.14 |
| H32 | 1.943  | -2.105 | 1.829  | 1.2   | 1.2  | 1.001 | 0.337  | -19.96 | 0.14 |
| H33 | 4.153  | -1.073 | 0.384  | 1.2   | 1.2  | 1.001 | 0.088  | -35.38 | 0.14 |
| H34 | 3.569  | -2.743 | 0.269  | 1.2   | 1.2  | 1.001 | 0.086  | -35.30 | 0.14 |
| H35 | 3.728  | -1.767 | -1.195 | 1.2   | 1.2  | 1.001 | 0.089  | -35.34 | 0.14 |
| H36 | 0.319  | 4.474  | -0.255 | 1.2   | 1.2  | 1.001 | 0.085  | -35.35 | 0.14 |
| H37 | -0.466 | 3.523  | -1.531 | 1.2   | 1.2  | 1.001 | 0.085  | -35.29 | 0.14 |

|                |        |        |        |        |       |       |       |        |        |      |
|----------------|--------|--------|--------|--------|-------|-------|-------|--------|--------|------|
| mefloquine (7) | H38    | -1.074 | 3.43   | 0.114  | 1.2   | 1.2   | 1.001 | 0.086  | -35.37 | 0.14 |
|                | C1     | 0.753  | -3.311 | -0.69  | 1.85  | 1.7   | 1.452 | -0.081 | -28.13 | 1.75 |
|                | C2     | 2.054  | -2.992 | -0.238 | 1.85  | 1.7   | 1.452 | -0.073 | -28.05 | 1.75 |
|                | C3     | 2.413  | -1.683 | -0.009 | 1.85  | 1.7   | 1.452 | -0.025 | -83.07 | 1.75 |
|                | C4     | 1.47   | -0.629 | -0.223 | 1.85  | 1.7   | 1.452 | 0.120  | -81.96 | 1.75 |
|                | C5     | 0.144  | -0.956 | -0.664 | 1.85  | 1.7   | 1.452 | 0.002  | -84.63 | 1.75 |
|                | C6     | -0.178 | -2.322 | -0.896 | 1.85  | 1.7   | 1.452 | -0.076 | -27.83 | 1.75 |
|                | N7     | 1.874  | 0.647  | 0      | 1.89  | 1.55  | 1.397 | -0.339 | 28.96  | 1.23 |
|                | C8     | 1.003  | 1.609  | -0.212 | 1.85  | 1.7   | 1.452 | 0.118  | -81.51 | 1.75 |
|                | C9     | -0.325 | 1.41   | -0.642 | 1.85  | 1.7   | 1.452 | -0.084 | -28.07 | 1.75 |
|                | C10    | -0.773 | 0.123  | -0.858 | 1.85  | 1.7   | 1.452 | 0.025  | -82.87 | 1.75 |
|                | C11    | -2.209 | -0.109 | -1.286 | 1.85  | 1.7   | 1.452 | 0.023  | -17.09 | 1.75 |
|                | C12    | -3.123 | -0.648 | -0.143 | 1.85  | 1.7   | 1.452 | 0.011  | -65.54 | 1.75 |
|                | C13    | -3.128 | 0.265  | 1.092  | 1.85  | 1.7   | 1.452 | -0.157 | -17.34 | 1.75 |
|                | C14    | -4.215 | -0.138 | 2.099  | 1.85  | 1.7   | 1.452 | -0.153 | -17.48 | 1.75 |
|                | C15    | -5.586 | -0.204 | 1.417  | 1.85  | 1.7   | 1.452 | -0.154 | -17.83 | 1.75 |
|                | C16    | -5.527 | -1.14  | 0.211  | 1.85  | 1.7   | 1.452 | -0.058 | -12.58 | 1.75 |
|                | N17    | -4.477 | -0.704 | -0.723 | 1.89  | 1.55  | 1.397 | -0.495 | 1.54   | 1.23 |
|                | O18    | -2.753 | 1.096  | -1.787 | 2.024 | 1.52  | 1.342 | -0.442 | 2.68   | 0.7  |
|                | H19    | -2.762 | -1.647 | 0.161  | 1.2   | 1.2   | 1.001 | 0.092  | -35.16 | 0.14 |
|                | C20    | 3.812  | -1.358 | 0.467  | 1.85  | 1.7   | 1.452 | 0.335  | 36.28  | 1.75 |
|                | F21    | 4.548  | -2.49  | 0.614  | 1.73  | 1.47  | 1.287 | -0.134 | 0.00   | 0.75 |
|                | F22    | 3.807  | -0.74  | 1.663  | 1.73  | 1.47  | 1.287 | -0.138 | 0.00   | 0.75 |
|                | F23    | 4.474  | -0.573 | -0.403 | 1.73  | 1.47  | 1.287 | -0.137 | 0.00   | 0.75 |
|                | C24    | 1.531  | 3.016  | 0.027  | 1.85  | 1.7   | 1.452 | 0.339  | 36.65  | 1.75 |
|                | F25    | 0.538  | 3.932  | -0.048 | 1.73  | 1.47  | 1.287 | -0.129 | 0.00   | 0.75 |
|                | F26    | 2.458  | 3.349  | -0.891 | 1.73  | 1.47  | 1.287 | -0.134 | 0.00   | 0.75 |
|                | F27    | 2.098  | 3.129  | 1.24   | 1.73  | 1.47  | 1.287 | -0.131 | 0.00   | 0.75 |
|                | H28    | -3.298 | 1.295  | 0.759  | 1.2   | 1.2   | 1.001 | 0.088  | -35.33 | 0.14 |
|                | H29    | -2.141 | 0.238  | 1.564  | 1.2   | 1.2   | 1.001 | 0.086  | -35.36 | 0.14 |
|                | H30    | -4.23  | 0.569  | 2.935  | 1.2   | 1.2   | 1.001 | 0.087  | -35.34 | 0.14 |
|                | H31    | -3.975 | -1.123 | 2.525  | 1.2   | 1.2   | 1.001 | 0.081  | -35.26 | 0.14 |
|                | H32    | -5.882 | 0.797  | 1.079  | 1.2   | 1.2   | 1.001 | 0.085  | -35.30 | 0.14 |
| H33            | -6.355 | -0.554 | 2.115  | 1.2    | 1.2   | 1.001 | 0.089 | -35.33 | 0.14   |      |
| H34            | -6.48  | -1.139 | -0.33  | 1.2    | 1.2   | 1.001 | 0.101 | -35.33 | 0.14   |      |
| H35            | -5.354 | -2.172 | 0.567  | 1.2    | 1.2   | 1.001 | 0.083 | -35.15 | 0.14   |      |
| H36            | -2.208 | -0.873 | -2.086 | 1.2    | 1.2   | 1.001 | 0.105 | -35.13 | 0.14   |      |
| H37            | 0.495  | -4.349 | -0.876 | 1.2    | 1.2   | 1.001 | 0.116 | -35.52 | 0.14   |      |
| H38            | 2.778  | -3.781 | -0.076 | 1.2    | 1.2   | 1.001 | 0.115 | -35.56 | 0.14   |      |
| H39            | -1.167 | -2.589 | -1.251 | 1.2    | 1.2   | 1.001 | 0.114 | -35.54 | 0.14   |      |
| H40            | -0.989 | 2.246  | -0.807 | 1.2    | 1.2   | 1.001 | 0.113 | -35.61 | 0.14   |      |
| H41            | -4.467 | -1.336 | -1.522 | 1.2    | 1.2   | 1.001 | 0.301 | 0.00   | 0.14   |      |
| H42            | -3.716 | 0.98   | -1.691 | 1.2    | 1.2   | 1.001 | 0.312 | -19.90 | 0.14   |      |
| menthol (8)    | C1     | 1.607  | 1.036  | -0.141 | 1.85  | 1.7   | 1.452 | -0.161 | -17.27 | 1.75 |
|                | C2     | 0.112  | 1.146  | 0.191  | 1.85  | 1.7   | 1.452 | 0.006  | -16.96 | 1.75 |

|              |     |        |        |        |       |      |       |        |        |      |
|--------------|-----|--------|--------|--------|-------|------|-------|--------|--------|------|
|              | C3  | -0.68  | -0.065 | -0.349 | 1.85  | 1.7  | 1.452 | -0.085 | -70.46 | 1.75 |
|              | C4  | -0.047 | -1.372 | 0.171  | 1.85  | 1.7  | 1.452 | -0.156 | -17.03 | 1.75 |
|              | C5  | 1.446  | -1.474 | -0.174 | 1.85  | 1.7  | 1.452 | -0.157 | -17.28 | 1.75 |
|              | C6  | 2.242  | -0.272 | 0.359  | 1.85  | 1.7  | 1.452 | -0.081 | -71.95 | 1.75 |
|              | C7  | 3.728  | -0.357 | -0.006 | 1.85  | 1.7  | 1.452 | -0.234 | 37.13  | 1.75 |
|              | O8  | -0.418 | 2.392  | -0.268 | 2.024 | 1.52 | 1.342 | -0.456 | 2.69   | 0.7  |
|              | C9  | -2.208 | 0.056  | -0.1   | 1.85  | 1.7  | 1.452 | -0.084 | -71.08 | 1.75 |
|              | C10 | -3.008 | -0.921 | -0.975 | 1.85  | 1.7  | 1.452 | -0.237 | 37.29  | 1.75 |
|              | C11 | -2.613 | -0.086 | 1.376  | 1.85  | 1.7  | 1.452 | -0.237 | 37.33  | 1.75 |
|              | H12 | 3.865  | -0.352 | -1.094 | 1.2   | 1.2  | 1.001 | 0.078  | -35.31 | 0.14 |
|              | H13 | 4.289  | 0.49   | 0.403  | 1.2   | 1.2  | 1.001 | 0.080  | -35.34 | 0.14 |
|              | H14 | 4.18   | -1.277 | 0.381  | 1.2   | 1.2  | 1.001 | 0.080  | -35.33 | 0.14 |
|              | H15 | -2.814 | -1.966 | -0.704 | 1.2   | 1.2  | 1.001 | 0.077  | -35.31 | 0.14 |
|              | H16 | -4.084 | -0.752 | -0.862 | 1.2   | 1.2  | 1.001 | 0.079  | -35.34 | 0.14 |
|              | H17 | -2.762 | -0.803 | -2.037 | 1.2   | 1.2  | 1.001 | 0.077  | -35.32 | 0.14 |
|              | H18 | -2.076 | 0.618  | 2.019  | 1.2   | 1.2  | 1.001 | 0.081  | -35.36 | 0.14 |
|              | H19 | -3.682 | 0.116  | 1.496  | 1.2   | 1.2  | 1.001 | 0.079  | -35.35 | 0.14 |
|              | H20 | -2.428 | -1.097 | 1.754  | 1.2   | 1.2  | 1.001 | 0.078  | -35.34 | 0.14 |
|              | H21 | 2.126  | 1.906  | 0.277  | 1.2   | 1.2  | 1.001 | 0.084  | -35.33 | 0.14 |
|              | H22 | 1.726  | 1.094  | -1.235 | 1.2   | 1.2  | 1.001 | 0.082  | -35.21 | 0.14 |
|              | H23 | -0.582 | -2.238 | -0.236 | 1.2   | 1.2  | 1.001 | 0.084  | -35.32 | 0.14 |
|              | H24 | -0.161 | -1.426 | 1.262  | 1.2   | 1.2  | 1.001 | 0.082  | -35.28 | 0.14 |
|              | H25 | 1.567  | -1.527 | -1.267 | 1.2   | 1.2  | 1.001 | 0.079  | -35.23 | 0.14 |
|              | H26 | 1.861  | -2.407 | 0.228  | 1.2   | 1.2  | 1.001 | 0.082  | -35.30 | 0.14 |
|              | H27 | -0.001 | 1.19   | 1.281  | 1.2   | 1.2  | 1.001 | 0.100  | -35.31 | 0.14 |
|              | H28 | -0.541 | -0.054 | -1.445 | 1.2   | 1.2  | 1.001 | 0.084  | -35.16 | 0.14 |
|              | H29 | 2.162  | -0.282 | 1.458  | 1.2   | 1.2  | 1.001 | 0.084  | -35.21 | 0.14 |
|              | H30 | -2.474 | 1.074  | -0.412 | 1.2   | 1.2  | 1.001 | 0.082  | -35.30 | 0.14 |
|              | H31 | -0.305 | 2.414  | -1.229 | 1.2   | 1.2  | 1.001 | 0.330  | -19.95 | 0.14 |
| ludartin (9) | C1  | -1.246 | -0.435 | 0.136  | 1.85  | 1.7  | 1.452 | -0.031 | -82.72 | 1.75 |
|              | C2  | -1.127 | 0.862  | 0.866  | 1.85  | 1.7  | 1.452 | -0.141 | -19.88 | 1.75 |
|              | C3  | 0.215  | 1.56   | 0.725  | 1.85  | 1.7  | 1.452 | -0.142 | -19.24 | 1.75 |
|              | C4  | 0.587  | 1.125  | -1.737 | 1.85  | 1.7  | 1.452 | 0.029  | -17.32 | 1.75 |
|              | C5  | -0.716 | 0.485  | -2.192 | 1.85  | 1.7  | 1.452 | -0.069 | -73.73 | 1.75 |
|              | C6  | -1.1   | -0.591 | -1.192 | 1.85  | 1.7  | 1.452 | -0.030 | -80.97 | 1.75 |
|              | H7  | -1.31  | 0.687  | 1.962  | 1.2   | 1.2  | 1.001 | 0.088  | -34.77 | 0.14 |
|              | H8  | -1.944 | 1.548  | 0.507  | 1.2   | 1.2  | 1.001 | 0.089  | -34.76 | 0.14 |
|              | H9  | -1.529 | 1.263  | -2.241 | 1.2   | 1.2  | 1.001 | 0.101  | -34.74 | 0.14 |
|              | C10 | -1.308 | -1.909 | -1.887 | 1.85  | 1.7  | 1.452 | -0.144 | -19.77 | 1.75 |
|              | C11 | 0.336  | 2.191  | -0.64  | 1.85  | 1.7  | 1.452 | -0.071 | -74.05 | 1.75 |
|              | H12 | 1.05   | 0.834  | 0.901  | 1.2   | 1.2  | 1.001 | 0.088  | -34.86 | 0.14 |
|              | H13 | 0.293  | 2.359  | 1.509  | 1.2   | 1.2  | 1.001 | 0.088  | -34.82 | 0.14 |
|              | O14 | 1.291  | 1.822  | -2.796 | 2.024 | 1.52 | 1.342 | -0.191 | 1.94   | 0.7  |
|              | H15 | 1.296  | 0.33   | -1.372 | 1.2   | 1.2  | 1.001 | 0.104  | -34.75 | 0.14 |
|              | C16 | 1.445  | 3.174  | -0.865 | 1.85  | 1.7  | 1.452 | -0.020 | -83.07 | 1.75 |

|                   |     |        |        |        |       |      |       |        |        |      |
|-------------------|-----|--------|--------|--------|-------|------|-------|--------|--------|------|
|                   | H17 | -0.628 | 2.734  | -0.872 | 1.2   | 1.2  | 1.001 | 0.105  | -34.66 | 0.14 |
|                   | C18 | 1.891  | 2.955  | -2.263 | 1.85  | 1.7  | 1.452 | 0.248  | 35.08  | 1.75 |
|                   | O19 | 2.644  | 3.569  | -3.009 | 2.024 | 1.52 | 1.342 | -0.347 | -2.40  | 0.7  |
|                   | C20 | 1.936  | 4.091  | -0.037 | 1.85  | 1.7  | 1.452 | -0.135 | 29.92  | 1.75 |
|                   | C21 | -0.658 | -0.219 | -3.546 | 1.85  | 1.7  | 1.452 | 0.067  | -75.94 | 1.75 |
|                   | H22 | 1.565  | 4.214  | 0.99   | 1.2   | 1.2  | 1.001 | 0.111  | -35.27 | 0.14 |
|                   | H23 | 2.743  | 4.774  | -0.343 | 1.2   | 1.2  | 1.001 | 0.110  | -35.24 | 0.14 |
|                   | C24 | -1.05  | -1.656 | -3.354 | 1.85  | 1.7  | 1.452 | -0.005 | -19.88 | 1.75 |
|                   | H25 | -2.354 | -2.276 | -1.727 | 1.2   | 1.2  | 1.001 | 0.094  | -34.87 | 0.14 |
|                   | H26 | -0.593 | -2.682 | -1.504 | 1.2   | 1.2  | 1.001 | 0.094  | -34.86 | 0.14 |
|                   | C27 | 0.188  | 0.29   | -4.655 | 1.85  | 1.7  | 1.452 | -0.223 | 35.12  | 1.75 |
|                   | O28 | -1.962 | -0.712 | -3.94  | 2.024 | 1.52 | 1.342 | -0.280 | 2.69   | 0.7  |
|                   | H29 | -0.759 | -2.495 | -4.002 | 1.2   | 1.2  | 1.001 | 0.113  | -35.26 | 0.14 |
|                   | C30 | -1.612 | -1.573 | 1.021  | 1.85  | 1.7  | 1.452 | -0.219 | 35.22  | 1.75 |
|                   | H31 | -2.616 | -1.385 | 1.481  | 1.2   | 1.2  | 1.001 | 0.087  | -34.86 | 0.14 |
|                   | H32 | -0.862 | -1.669 | 1.846  | 1.2   | 1.2  | 1.001 | 0.085  | -34.88 | 0.14 |
|                   | H33 | -1.656 | -2.546 | 0.477  | 1.2   | 1.2  | 1.001 | 0.084  | -34.95 | 0.14 |
|                   | H34 | 1.269  | 0.142  | -4.41  | 1.2   | 1.2  | 1.001 | 0.089  | -34.90 | 0.14 |
|                   | H35 | 0.009  | 1.383  | -4.807 | 1.2   | 1.2  | 1.001 | 0.088  | -34.91 | 0.14 |
|                   | H36 | -0.052 | -0.25  | -5.604 | 1.2   | 1.2  | 1.001 | 0.087  | -34.91 | 0.14 |
| parthenolide (10) | C1  | -3.326 | -0.214 | -0.87  | 1.85  | 1.7  | 1.452 | -0.151 | -18.18 | 1.75 |
|                   | C2  | -2.688 | -1.621 | -0.806 | 1.85  | 1.7  | 1.452 | -0.148 | -17.79 | 1.75 |
|                   | C3  | -1.526 | -1.642 | 0.165  | 1.85  | 1.7  | 1.452 | 0.069  | -76.58 | 1.75 |
|                   | C4  | -0.195 | -1.352 | -0.398 | 1.85  | 1.7  | 1.452 | -0.009 | -21.34 | 1.75 |
|                   | C5  | -1.88  | 1.775  | -0.166 | 1.85  | 1.7  | 1.452 | -0.026 | -81.26 | 1.75 |
|                   | C6  | -2.257 | 0.832  | -1.04  | 1.85  | 1.7  | 1.452 | -0.113 | -25.71 | 1.75 |
|                   | C7  | 0.907  | -0.651 | 0.345  | 1.85  | 1.7  | 1.452 | 0.028  | -17.99 | 1.75 |
|                   | C8  | 1.257  | 0.742  | -0.245 | 1.85  | 1.7  | 1.452 | -0.069 | -71.92 | 1.75 |
|                   | C9  | 0.592  | 1.975  | 0.401  | 1.85  | 1.7  | 1.452 | -0.144 | -16.70 | 1.75 |
|                   | C10 | -0.604 | 2.557  | -0.381 | 1.85  | 1.7  | 1.452 | -0.151 | -18.05 | 1.75 |
|                   | O11 | 2.105  | -1.457 | 0.2    | 2.024 | 1.52 | 1.342 | -0.197 | 0.13   | 0.7  |
|                   | C12 | 3.194  | -0.694 | -0.001 | 1.85  | 1.7  | 1.452 | 0.248  | 35.38  | 1.75 |
|                   | C13 | 2.766  | 0.725  | -0.165 | 1.85  | 1.7  | 1.452 | -0.024 | -82.24 | 1.75 |
|                   | O14 | -0.554 | -2.677 | -0.018 | 2.024 | 1.52 | 1.342 | -0.271 | 2.69   | 0.7  |
|                   | O15 | 4.309  | -1.156 | -0.035 | 2.024 | 1.52 | 1.342 | -0.348 | -2.60  | 0.7  |
|                   | C16 | 3.657  | 1.711  | -0.227 | 1.85  | 1.7  | 1.452 | -0.149 | 29.94  | 1.75 |
|                   | C17 | -1.865 | -1.365 | 1.61   | 1.85  | 1.7  | 1.452 | -0.229 | 36.15  | 1.75 |
|                   | C18 | -2.609 | 2.13   | 1.105  | 1.85  | 1.7  | 1.452 | -0.229 | 36.05  | 1.75 |
|                   | H19 | -4.03  | -0.192 | -1.71  | 1.2   | 1.2  | 1.001 | 0.090  | -35.32 | 0.14 |
|                   | H20 | -3.909 | -0.035 | 0.038  | 1.2   | 1.2  | 1.001 | 0.091  | -35.37 | 0.14 |
|                   | H21 | -2.318 | -1.911 | -1.796 | 1.2   | 1.2  | 1.001 | 0.095  | -35.33 | 0.14 |
|                   | H22 | -3.441 | -2.358 | -0.504 | 1.2   | 1.2  | 1.001 | 0.093  | -35.32 | 0.14 |
|                   | H23 | -0.128 | -1.225 | -1.481 | 1.2   | 1.2  | 1.001 | 0.111  | -35.39 | 0.14 |
|                   | H24 | -1.649 | 0.721  | -1.942 | 1.2   | 1.2  | 1.001 | 0.089  | -35.37 | 0.14 |
|                   | H25 | 0.702  | -0.581 | 1.417  | 1.2   | 1.2  | 1.001 | 0.117  | -35.37 | 0.14 |



|                |     |        |        |        |       |      |       |        |        |      |
|----------------|-----|--------|--------|--------|-------|------|-------|--------|--------|------|
|                | H26 | 0.991  | 0.718  | -1.313 | 1.2   | 1.2  | 1.001 | 0.107  | -35.23 | 0.14 |
|                | H27 | 0.293  | 1.733  | 1.429  | 1.2   | 1.2  | 1.001 | 0.091  | -35.30 | 0.14 |
|                | H28 | 1.35   | 2.76   | 0.486  | 1.2   | 1.2  | 1.001 | 0.091  | -35.35 | 0.14 |
|                | H29 | -0.347 | 2.587  | -1.447 | 1.2   | 1.2  | 1.001 | 0.090  | -35.31 | 0.14 |
|                | H30 | -0.752 | 3.594  | -0.055 | 1.2   | 1.2  | 1.001 | 0.088  | -35.31 | 0.14 |
|                | H31 | 3.367  | 2.751  | -0.343 | 1.2   | 1.2  | 1.001 | 0.109  | -35.51 | 0.14 |
|                | H32 | 4.717  | 1.482  | -0.163 | 1.2   | 1.2  | 1.001 | 0.109  | -35.50 | 0.14 |
|                | H33 | -2.164 | -0.324 | 1.756  | 1.2   | 1.2  | 1.001 | 0.091  | -35.38 | 0.14 |
|                | H34 | -2.702 | -2.004 | 1.913  | 1.2   | 1.2  | 1.001 | 0.093  | -35.33 | 0.14 |
|                | H35 | -1.019 | -1.587 | 2.262  | 1.2   | 1.2  | 1.001 | 0.095  | -35.42 | 0.14 |
|                | H36 | -3.479 | 1.501  | 1.302  | 1.2   | 1.2  | 1.001 | 0.089  | -35.41 | 0.14 |
|                | H37 | -1.941 | 2.074  | 1.973  | 1.2   | 1.2  | 1.001 | 0.088  | -35.31 | 0.14 |
|                | H38 | -2.955 | 3.169  | 1.045  | 1.2   | 1.2  | 1.001 | 0.089  | -35.31 | 0.14 |
| yohimbine (11) | C1  | -4.535 | 2.169  | 0.361  | 1.85  | 1.7  | 1.452 | -0.116 | -28.26 | 1.75 |
|                | C2  | -3.658 | 1.087  | 0.282  | 1.85  | 1.7  | 1.452 | 0.080  | -82.57 | 1.75 |
|                | C3  | -4.086 | -0.209 | -0.108 | 1.85  | 1.7  | 1.452 | -0.039 | -85.63 | 1.75 |
|                | C4  | -5.438 | -0.409 | -0.424 | 1.85  | 1.7  | 1.452 | -0.111 | -28.05 | 1.75 |
|                | C5  | -6.315 | 0.664  | -0.346 | 1.85  | 1.7  | 1.452 | -0.126 | -27.91 | 1.75 |
|                | C6  | -5.868 | 1.94   | 0.043  | 1.85  | 1.7  | 1.452 | -0.121 | -27.87 | 1.75 |
|                | C7  | -2.928 | -1.056 | -0.071 | 1.85  | 1.7  | 1.452 | -0.054 | -84.07 | 1.75 |
|                | C8  | -1.875 | -0.274 | 0.315  | 1.85  | 1.7  | 1.452 | 0.086  | -80.58 | 1.75 |
|                | N9  | -2.306 | 1.017  | 0.533  | 1.89  | 1.55 | 1.397 | -0.411 | 28.57  | 1.23 |
|                | C10 | -0.471 | -0.747 | 0.508  | 1.85  | 1.7  | 1.452 | 0.025  | -69.46 | 1.75 |
|                | N11 | -0.34  | -2.071 | -0.096 | 1.89  | 1.55 | 1.397 | -0.362 | -33.60 | 1.23 |
|                | C12 | -1.429 | -2.968 | 0.271  | 1.85  | 1.7  | 1.452 | -0.054 | -13.49 | 1.75 |
|                | C13 | -2.751 | -2.512 | -0.343 | 1.85  | 1.7  | 1.452 | -0.148 | -19.59 | 1.75 |
|                | C14 | 0.574  | 0.198  | -0.093 | 1.85  | 1.7  | 1.452 | -0.152 | -17.92 | 1.75 |
|                | C15 | 1.983  | -0.345 | 0.132  | 1.85  | 1.7  | 1.452 | -0.076 | -72.21 | 1.75 |
|                | C16 | 2.084  | -1.78  | -0.4   | 1.85  | 1.7  | 1.452 | -0.080 | -72.94 | 1.75 |
|                | C17 | 0.968  | -2.635 | 0.188  | 1.85  | 1.7  | 1.452 | -0.054 | -13.98 | 1.75 |
|                | C18 | 3.084  | 0.521  | -0.51  | 1.85  | 1.7  | 1.452 | -0.080 | -72.45 | 1.75 |
|                | C19 | 4.484  | -0.065 | -0.208 | 1.85  | 1.7  | 1.452 | 0.013  | -17.39 | 1.75 |
|                | C20 | 4.57   | -1.497 | -0.718 | 1.85  | 1.7  | 1.452 | -0.154 | -18.37 | 1.75 |
|                | C21 | 3.466  | -2.372 | -0.132 | 1.85  | 1.7  | 1.452 | -0.155 | -18.16 | 1.75 |
|                | H22 | -0.269 | -0.813 | 1.603  | 1.2   | 1.2  | 1.001 | 0.090  | -34.96 | 0.14 |
|                | H23 | 2.176  | -0.373 | 1.215  | 1.2   | 1.2  | 1.001 | 0.093  | -35.24 | 0.14 |
|                | H24 | 1.918  | -1.743 | -1.489 | 1.2   | 1.2  | 1.001 | 0.089  | -35.21 | 0.14 |
|                | O25 | 4.761  | -0.088 | 1.175  | 2.024 | 1.52 | 1.342 | -0.458 | 2.65   | 0.7  |
|                | C26 | 3.017  | 1.948  | -0.032 | 1.85  | 1.7  | 1.452 | 0.267  | 36.00  | 1.75 |
|                | O27 | 2.528  | 2.784  | -0.953 | 2.024 | 1.52 | 1.342 | -0.204 | -0.16  | 0.7  |
|                | O28 | 3.372  | 2.323  | 1.072  | 2.024 | 1.52 | 1.342 | -0.328 | -2.48  | 0.7  |
|                | C29 | 2.446  | 4.159  | -0.565 | 1.85  | 1.7  | 1.452 | -0.113 | 91.88  | 1.75 |
|                | H30 | -4.193 | 3.156  | 0.662  | 1.2   | 1.2  | 1.001 | 0.102  | -35.49 | 0.14 |
|                | H31 | -5.794 | -1.391 | -0.726 | 1.2   | 1.2  | 1.001 | 0.098  | -35.49 | 0.14 |
|                | H32 | -7.364 | 0.52   | -0.588 | 1.2   | 1.2  | 1.001 | 0.094  | -35.51 | 0.14 |

|               |     |        |        |        |       |      |       |        |         |      |
|---------------|-----|--------|--------|--------|-------|------|-------|--------|---------|------|
|               | H33 | -6.577 | 2.761  | 0.095  | 1.2   | 1.2  | 1.001 | 0.095  | -35.51  | 0.14 |
|               | H34 | -1.731 | 1.786  | 0.831  | 1.2   | 1.2  | 1.001 | 0.347  | 0.00    | 0.14 |
|               | H35 | -1.538 | -3.034 | 1.372  | 1.2   | 1.2  | 1.001 | 0.079  | -35.09  | 0.14 |
|               | H36 | -1.173 | -3.97  | -0.089 | 1.2   | 1.2  | 1.001 | 0.102  | -35.34  | 0.14 |
|               | H37 | -2.745 | -2.713 | -1.423 | 1.2   | 1.2  | 1.001 | 0.086  | -35.28  | 0.14 |
|               | H38 | -3.572 | -3.097 | 0.089  | 1.2   | 1.2  | 1.001 | 0.092  | -35.31  | 0.14 |
|               | H39 | 0.477  | 1.189  | 0.37   | 1.2   | 1.2  | 1.001 | 0.091  | -35.29  | 0.14 |
|               | H40 | 0.369  | 0.314  | -1.164 | 1.2   | 1.2  | 1.001 | 0.090  | -35.31  | 0.14 |
|               | H41 | 1.011  | -3.639 | -0.25  | 1.2   | 1.2  | 1.001 | 0.102  | -35.32  | 0.14 |
|               | H42 | 1.133  | -2.752 | 1.281  | 1.2   | 1.2  | 1.001 | 0.080  | -35.03  | 0.14 |
|               | H43 | 2.938  | 0.527  | -1.597 | 1.2   | 1.2  | 1.001 | 0.108  | -35.31  | 0.14 |
|               | H44 | 5.235  | 0.55   | -0.733 | 1.2   | 1.2  | 1.001 | 0.092  | -35.18  | 0.14 |
|               | H45 | 5.557  | -1.895 | -0.459 | 1.2   | 1.2  | 1.001 | 0.091  | -35.34  | 0.14 |
|               | H46 | 4.503  | -1.484 | -1.815 | 1.2   | 1.2  | 1.001 | 0.088  | -35.27  | 0.14 |
|               | H47 | 3.527  | -3.383 | -0.554 | 1.2   | 1.2  | 1.001 | 0.085  | -35.30  | 0.14 |
|               | H48 | 3.62   | -2.465 | 0.95   | 1.2   | 1.2  | 1.001 | 0.085  | -35.31  | 0.14 |
|               | H49 | 4.516  | 0.778  | 1.537  | 1.2   | 1.2  | 1.001 | 0.310  | -19.94  | 0.14 |
|               | H50 | 3.44   | 4.547  | -0.327 | 1.2   | 1.2  | 1.001 | 0.110  | -35.38  | 0.14 |
|               | H51 | 2.025  | 4.68   | -1.423 | 1.2   | 1.2  | 1.001 | 0.116  | -35.46  | 0.14 |
|               | H52 | 1.803  | 4.272  | 0.311  | 1.2   | 1.2  | 1.001 | 0.108  | -35.39  | 0.14 |
| santonin (12) | C1  | 3.423  | -0.388 | -0.552 | 1.85  | 1.7  | 1.452 | -0.108 | -27.12  | 1.75 |
|               | C2  | 2.859  | 0.967  | -0.431 | 1.85  | 1.7  | 1.452 | 0.155  | -21.53  | 1.75 |
|               | C3  | 1.43   | 1.099  | 0.003  | 1.85  | 1.7  | 1.452 | -0.022 | -81.13  | 1.75 |
|               | C4  | 0.716  | -0.014 | 0.296  | 1.85  | 1.7  | 1.452 | 0.009  | -79.63  | 1.75 |
|               | C5  | 1.302  | -1.436 | 0.281  | 1.85  | 1.7  | 1.452 | 0.004  | -125.08 | 1.75 |
|               | C6  | 2.714  | -1.475 | -0.233 | 1.85  | 1.7  | 1.452 | -0.057 | -25.90  | 1.75 |
|               | C7  | -0.753 | -0.067 | 0.637  | 1.85  | 1.7  | 1.452 | 0.027  | -18.28  | 1.75 |
|               | C8  | -1.53  | -0.894 | -0.405 | 1.85  | 1.7  | 1.452 | -0.077 | -72.48  | 1.75 |
|               | C9  | -1.068 | -2.345 | -0.369 | 1.85  | 1.7  | 1.452 | -0.147 | -17.70  | 1.75 |
|               | C10 | 0.448  | -2.381 | -0.638 | 1.85  | 1.7  | 1.452 | -0.142 | -15.51  | 1.75 |
|               | O11 | -1.474 | 1.179  | 0.703  | 2.024 | 1.52 | 1.342 | -0.192 | 1.26    | 0.7  |
|               | C12 | -2.784 | 0.964  | 0.352  | 1.85  | 1.7  | 1.452 | 0.262  | 37.25   | 1.75 |
|               | C13 | -2.972 | -0.499 | -0.074 | 1.85  | 1.7  | 1.452 | -0.071 | -72.55  | 1.75 |
|               | C14 | 1.356  | -2.015 | 1.729  | 1.85  | 1.7  | 1.452 | -0.222 | 38.41   | 1.75 |
|               | O15 | 3.547  | 1.951  | -0.693 | 2.024 | 1.52 | 1.342 | -0.340 | -2.36   | 0.7  |
|               | C16 | 0.92   | 2.523  | 0.046  | 1.85  | 1.7  | 1.452 | -0.238 | 36.29   | 1.75 |
|               | O17 | -3.606 | 1.84   | 0.388  | 2.024 | 1.52 | 1.342 | -0.334 | -2.66   | 0.7  |
|               | C18 | -4.02  | -0.659 | -1.173 | 1.85  | 1.7  | 1.452 | -0.224 | 36.88   | 1.75 |
|               | H19 | 4.449  | -0.445 | -0.905 | 1.2   | 1.2  | 1.001 | 0.108  | -35.50  | 0.14 |
|               | H20 | 3.157  | -2.468 | -0.314 | 1.2   | 1.2  | 1.001 | 0.112  | -35.43  | 0.14 |
|               | H21 | -0.873 | -0.544 | 1.622  | 1.2   | 1.2  | 1.001 | 0.114  | -35.23  | 0.14 |
|               | H22 | -1.286 | -0.474 | -1.393 | 1.2   | 1.2  | 1.001 | 0.101  | -35.23  | 0.14 |
|               | H23 | -1.585 | -2.945 | -1.128 | 1.2   | 1.2  | 1.001 | 0.096  | -35.31  | 0.14 |
|               | H24 | -1.307 | -2.795 | 0.604  | 1.2   | 1.2  | 1.001 | 0.090  | -35.28  | 0.14 |
|               | H25 | 0.623  | -2.084 | -1.68  | 1.2   | 1.2  | 1.001 | 0.089  | -35.30  | 0.14 |

|                            |        |        |        |        |       |       |        |        |         |      |
|----------------------------|--------|--------|--------|--------|-------|-------|--------|--------|---------|------|
|                            | H26    | 0.831  | -3.404 | -0.534 | 1.2   | 1.2   | 1.001  | 0.094  | -35.30  | 0.14 |
|                            | H27    | -3.299 | -1.045 | 0.827  | 1.2   | 1.2   | 1.001  | 0.113  | -35.19  | 0.14 |
|                            | H28    | 1.916  | -1.344 | 2.388  | 1.2   | 1.2   | 1.001  | 0.088  | -35.35  | 0.14 |
|                            | H29    | 0.362  | -2.167 | 2.159  | 1.2   | 1.2   | 1.001  | 0.090  | -35.37  | 0.14 |
|                            | H30    | 1.862  | -2.987 | 1.722  | 1.2   | 1.2   | 1.001  | 0.091  | -35.33  | 0.14 |
|                            | H31    | 1.775  | 3.199  | 0      | 1.2   | 1.2   | 1.001  | 0.084  | -35.42  | 0.14 |
|                            | H32    | 0.274  | 2.742  | -0.812 | 1.2   | 1.2   | 1.001  | 0.089  | -35.32  | 0.14 |
|                            | H33    | 0.336  | 2.723  | 0.945  | 1.2   | 1.2   | 1.001  | 0.088  | -35.43  | 0.14 |
|                            | H34    | -4.967 | -0.209 | -0.861 | 1.2   | 1.2   | 1.001  | 0.091  | -35.36  | 0.14 |
|                            | H35    | -3.7   | -0.158 | -2.094 | 1.2   | 1.2   | 1.001  | 0.089  | -35.32  | 0.14 |
|                            | H36    | -4.193 | -1.716 | -1.4   | 1.2   | 1.2   | 1.001  | 0.089  | -35.35  | 0.14 |
| sesquiterpenoid-13<br>(13) | C1     | -3.551 | 1.209  | 0.105  | 1.85  | 1.7   | 1.452  | -0.152 | -17.51  | 1.75 |
|                            | C2     | -3.55  | -0.32  | 0.036  | 1.85  | 1.7   | 1.452  | -0.156 | -17.41  | 1.75 |
|                            | C3     | -2.273 | -0.868 | -0.626 | 1.85  | 1.7   | 1.452  | -0.074 | -69.80  | 1.75 |
|                            | C4     | -0.952 | -0.374 | 0.078  | 1.85  | 1.7   | 1.452  | 0.002  | -123.38 | 1.75 |
|                            | C5     | -1.024 | 1.144  | 0.261  | 1.85  | 1.7   | 1.452  | 0.028  | -80.00  | 1.75 |
|                            | C6     | -2.298 | 1.716  | 0.837  | 1.85  | 1.7   | 1.452  | -0.145 | -18.37  | 1.75 |
|                            | C7     | 0.252  | -0.737 | -0.831 | 1.85  | 1.7   | 1.452  | -0.149 | -17.26  | 1.75 |
|                            | C8     | 1.543  | 0.002  | -0.514 | 1.85  | 1.7   | 1.452  | 0.062  | -74.65  | 1.75 |
|                            | C9     | 1.335  | 1.505  | -0.499 | 1.85  | 1.7   | 1.452  | 0.164  | -20.78  | 1.75 |
|                            | C10    | 0.011  | 1.958  | -0.041 | 1.85  | 1.7   | 1.452  | -0.121 | -26.71  | 1.75 |
|                            | C11    | -2.365 | -2.395 | -0.779 | 1.85  | 1.7   | 1.452  | -0.233 | 37.34   | 1.75 |
|                            | C12    | 2.71   | -0.604 | 0.222  | 1.85  | 1.7   | 1.452  | 0.079  | -74.80  | 1.75 |
|                            | O13    | 2.706  | -0.463 | -1.21  | 2.024 | 1.52  | 1.342  | -0.260 | 2.69    | 0.7  |
|                            | C14    | 3.712  | 0.268  | 0.955  | 1.85  | 1.7   | 1.452  | -0.234 | 36.45   | 1.75 |
|                            | C15    | 2.669  | -2.034 | 0.729  | 1.85  | 1.7   | 1.452  | -0.227 | 36.48   | 1.75 |
|                            | O16    | 2.209  | 2.305  | -0.814 | 2.024 | 1.52  | 1.342  | -0.328 | -2.39   | 0.7  |
| C17                        | -0.771 | -1.024 | 1.476  | 1.85   | 1.7   | 1.452 | -0.230 | 38.03  | 1.75    |      |
| H18                        | -4.451 | 1.576  | 0.612  | 1.2    | 1.2   | 1.001 | 0.088  | -35.32 | 0.14    |      |
| H19                        | -3.569 | 1.623  | -0.913 | 1.2    | 1.2   | 1.001 | 0.084  | -35.27 | 0.14    |      |
| H20                        | -4.419 | -0.671 | -0.534 | 1.2    | 1.2   | 1.001 | 0.087  | -35.31 | 0.14    |      |
| H21                        | -3.66  | -0.738 | 1.047  | 1.2    | 1.2   | 1.001 | 0.083  | -35.26 | 0.14    |      |
| H22                        | -2.239 | -0.441 | -1.64  | 1.2    | 1.2   | 1.001 | 0.088  | -35.24 | 0.14    |      |
| H23                        | -2.249 | 2.81   | 0.826  | 1.2    | 1.2   | 1.001 | 0.095  | -35.34 | 0.14    |      |
| H24                        | -2.368 | 1.418  | 1.894  | 1.2    | 1.2   | 1.001 | 0.097  | -35.24 | 0.14    |      |
| H25                        | 0.427  | -1.814 | -0.813 | 1.2    | 1.2   | 1.001 | 0.098  | -35.41 | 0.14    |      |
| H26                        | -0.003 | -0.484 | -1.869 | 1.2    | 1.2   | 1.001 | 0.095  | -35.28 | 0.14    |      |
| H27                        | -0.079 | 3.035  | 0.081  | 1.2    | 1.2   | 1.001 | 0.102  | -35.48 | 0.14    |      |
| H28                        | -2.477 | -2.895 | 0.19   | 1.2    | 1.2   | 1.001 | 0.081  | -35.32 | 0.14    |      |
| H29                        | -3.243 | -2.653 | -1.38  | 1.2    | 1.2   | 1.001 | 0.084  | -35.35 | 0.14    |      |
| H30                        | -1.493 | -2.823 | -1.282 | 1.2    | 1.2   | 1.001 | 0.084  | -35.36 | 0.14    |      |
| H31                        | 4.703  | -0.195 | 0.893  | 1.2    | 1.2   | 1.001 | 0.091  | -35.33 | 0.14    |      |
| H32                        | 3.768  | 1.265  | 0.521  | 1.2    | 1.2   | 1.001 | 0.090  | -35.46 | 0.14    |      |
| H33                        | 3.446  | 0.347  | 2.016  | 1.2    | 1.2   | 1.001 | 0.089  | -35.31 | 0.14    |      |

|                  |     |        |        |        |       |      |       |        |        |      |
|------------------|-----|--------|--------|--------|-------|------|-------|--------|--------|------|
|                  | H34 | 2.391  | -2.064 | 1.788  | 1.2   | 1.2  | 1.001 | 0.092  | -35.34 | 0.14 |
|                  | H35 | 3.671  | -2.47  | 0.635  | 1.2   | 1.2  | 1.001 | 0.093  | -35.31 | 0.14 |
|                  | H36 | 1.981  | -2.665 | 0.166  | 1.2   | 1.2  | 1.001 | 0.093  | -35.43 | 0.14 |
|                  | H37 | -0.65  | -2.108 | 1.389  | 1.2   | 1.2  | 1.001 | 0.088  | -35.36 | 0.14 |
|                  | H38 | 0.118  | -0.626 | 1.972  | 1.2   | 1.2  | 1.001 | 0.084  | -35.38 | 0.14 |
|                  | H39 | -1.626 | -0.836 | 2.131  | 1.2   | 1.2  | 1.001 | 0.086  | -35.37 | 0.14 |
| artemisinin (14) | C1  | 1.45   | -5.6   | -1.805 | 1.85  | 1.7  | 1.452 | 0.121  | 37.97  | 1.75 |
|                  | O2  | 1.057  | -4.218 | -1.87  | 2.024 | 1.52 | 1.342 | -0.207 | 0.28   | 0.7  |
|                  | C3  | 1.949  | -3.26  | -2.196 | 1.85  | 1.7  | 1.452 | 0.260  | 36.48  | 1.75 |
|                  | C4  | 2.983  | -3.629 | -3.244 | 1.85  | 1.7  | 1.452 | -0.079 | -72.76 | 1.75 |
|                  | C5  | 3.575  | -5.035 | -3.039 | 1.85  | 1.7  | 1.452 | -0.076 | -71.77 | 1.75 |
|                  | C6  | 2.427  | -6.051 | -2.922 | 1.85  | 1.7  | 1.452 | 0.076  | -70.29 | 1.75 |
|                  | C7  | 4.554  | -5.137 | -1.862 | 1.85  | 1.7  | 1.452 | -0.154 | -17.91 | 1.75 |
|                  | C8  | 5.099  | -6.554 | -1.725 | 1.85  | 1.7  | 1.452 | -0.156 | -17.92 | 1.75 |
|                  | C9  | 3.986  | -7.597 | -1.562 | 1.85  | 1.7  | 1.452 | -0.081 | -71.30 | 1.75 |
|                  | C10 | 2.949  | -7.501 | -2.715 | 1.85  | 1.7  | 1.452 | -0.079 | -69.64 | 1.75 |
|                  | C11 | 1.811  | -8.534 | -2.522 | 1.85  | 1.7  | 1.452 | -0.158 | -16.72 | 1.75 |
|                  | C12 | 0.512  | -8.273 | -3.299 | 1.85  | 1.7  | 1.452 | -0.160 | -16.95 | 1.75 |
|                  | C13 | -0.084 | -6.869 | -3.059 | 1.85  | 1.7  | 1.452 | 0.168  | -17.40 | 1.75 |
|                  | O14 | 0.266  | -6.408 | -1.753 | 2.024 | 1.52 | 1.342 | -0.235 | 2.69   | 0.7  |
|                  | C15 | -1.607 | -6.914 | -3.14  | 1.85  | 1.7  | 1.452 | -0.224 | 36.83  | 1.75 |
|                  | O16 | 1.833  | -2.124 | -1.744 | 2.024 | 1.52 | 1.342 | -0.340 | -2.37  | 0.7  |
|                  | C17 | 4.061  | -2.546 | -3.35  | 1.85  | 1.7  | 1.452 | -0.230 | 37.09  | 1.75 |
|                  | C18 | 4.617  | -8.991 | -1.459 | 1.85  | 1.7  | 1.452 | -0.233 | 37.18  | 1.75 |
|                  | O19 | 0.347  | -5.93  | -4.054 | 2.024 | 1.52 | 1.342 | -0.145 | 1.09   | 0.7  |
|                  | O20 | 1.79   | -6.073 | -4.224 | 2.024 | 1.52 | 1.342 | -0.140 | 1.09   | 0.7  |
|                  | H21 | 1.917  | -5.717 | -0.821 | 1.2   | 1.2  | 1.001 | 0.134  | -35.34 | 0.14 |
|                  | H22 | 2.441  | -3.616 | -4.2   | 1.2   | 1.2  | 1.001 | 0.115  | -35.27 | 0.14 |
|                  | H23 | 4.144  | -5.268 | -3.953 | 1.2   | 1.2  | 1.001 | 0.105  | -35.22 | 0.14 |
|                  | H24 | 5.404  | -4.463 | -2.014 | 1.2   | 1.2  | 1.001 | 0.094  | -35.34 | 0.14 |
|                  | H25 | 4.076  | -4.831 | -0.925 | 1.2   | 1.2  | 1.001 | 0.090  | -35.33 | 0.14 |
|                  | H26 | 5.705  | -6.793 | -2.608 | 1.2   | 1.2  | 1.001 | 0.085  | -35.30 | 0.14 |
|                  | H27 | 5.774  | -6.593 | -0.862 | 1.2   | 1.2  | 1.001 | 0.088  | -35.32 | 0.14 |
|                  | H28 | 3.477  | -7.4   | -0.609 | 1.2   | 1.2  | 1.001 | 0.090  | -35.28 | 0.14 |
|                  | H29 | 3.46   | -7.789 | -3.647 | 1.2   | 1.2  | 1.001 | 0.098  | -35.23 | 0.14 |
|                  | H30 | 2.178  | -9.528 | -2.805 | 1.2   | 1.2  | 1.001 | 0.092  | -35.31 | 0.14 |
|                  | H31 | 1.56   | -8.604 | -1.455 | 1.2   | 1.2  | 1.001 | 0.084  | -35.28 | 0.14 |
|                  | H32 | -0.202 | -9.037 | -2.966 | 1.2   | 1.2  | 1.001 | 0.098  | -35.30 | 0.14 |
|                  | H33 | 0.674  | -8.443 | -4.37  | 1.2   | 1.2  | 1.001 | 0.096  | -35.32 | 0.14 |
|                  | H34 | -1.943 | -7.255 | -4.125 | 1.2   | 1.2  | 1.001 | 0.099  | -35.34 | 0.14 |
|                  | H35 | -2.031 | -7.566 | -2.369 | 1.2   | 1.2  | 1.001 | 0.103  | -35.34 | 0.14 |
|                  | H36 | -2.028 | -5.914 | -2.983 | 1.2   | 1.2  | 1.001 | 0.095  | -35.32 | 0.14 |
|                  | H37 | 3.622  | -1.6   | -3.687 | 1.2   | 1.2  | 1.001 | 0.086  | -35.33 | 0.14 |
|                  | H38 | 4.54   | -2.35  | -2.385 | 1.2   | 1.2  | 1.001 | 0.085  | -35.34 | 0.14 |
|                  | H39 | 4.833  | -2.829 | -4.074 | 1.2   | 1.2  | 1.001 | 0.086  | -35.33 | 0.14 |

19-OH-  
eburnamonine (15)

|     |        |        |        |       |      |       |        |         |      |
|-----|--------|--------|--------|-------|------|-------|--------|---------|------|
| H40 | 5.387  | -9.011 | -0.68  | 1.2   | 1.2  | 1.001 | 0.083  | -35.33  | 0.14 |
| H41 | 3.873  | -9.749 | -1.194 | 1.2   | 1.2  | 1.001 | 0.081  | -35.35  | 0.14 |
| H42 | 5.084  | -9.286 | -2.404 | 1.2   | 1.2  | 1.001 | 0.082  | -35.35  | 0.14 |
| O1  | -0.886 | -3.193 | 0.044  | 2.024 | 1.52 | 1.342 | -0.333 | -2.49   | 0.7  |
| C2  | -0.339 | -2.131 | -0.19  | 1.85  | 1.7  | 1.452 | 0.278  | -17.46  | 1.75 |
| N3  | -1.044 | -0.933 | -0.276 | 1.89  | 1.55 | 1.397 | -0.244 | 15.76   | 1.23 |
| C4  | -2.42  | -0.698 | -0.081 | 1.85  | 1.7  | 1.452 | 0.085  | -80.68  | 1.75 |
| C5  | -3.462 | -1.594 | 0.149  | 1.85  | 1.7  | 1.452 | -0.103 | -28.13  | 1.75 |
| C6  | -4.739 | -1.055 | 0.306  | 1.85  | 1.7  | 1.452 | -0.108 | -27.78  | 1.75 |
| C7  | -4.965 | 0.329  | 0.236  | 1.85  | 1.7  | 1.452 | -0.110 | -27.85  | 1.75 |
| C8  | -3.917 | 1.217  | 0.006  | 1.85  | 1.7  | 1.452 | -0.103 | -27.97  | 1.75 |
| C9  | -2.623 | 0.706  | -0.156 | 1.85  | 1.7  | 1.452 | -0.025 | -85.09  | 1.75 |
| C10 | -0.424 | 0.308  | -0.467 | 1.85  | 1.7  | 1.452 | 0.082  | -79.53  | 1.75 |
| C11 | -1.33  | 1.317  | -0.401 | 1.85  | 1.7  | 1.452 | -0.034 | -83.39  | 1.75 |
| C12 | -0.899 | 2.753  | -0.486 | 1.85  | 1.7  | 1.452 | -0.145 | -17.80  | 1.75 |
| C13 | 0.621  | 2.843  | -0.814 | 1.85  | 1.7  | 1.452 | -0.051 | -10.80  | 1.75 |
| N14 | 1.463  | 1.808  | -0.179 | 1.89  | 1.55 | 1.397 | -0.338 | -31.34  | 1.23 |
| C15 | 1.049  | 0.468  | -0.671 | 1.85  | 1.7  | 1.452 | 0.023  | -66.75  | 1.75 |
| C16 | 1.871  | -0.7   | -0.061 | 1.85  | 1.7  | 1.452 | -0.004 | -122.94 | 1.75 |
| C17 | 1.903  | -0.562 | 1.48   | 1.85  | 1.7  | 1.452 | -0.153 | -16.79  | 1.75 |
| C18 | 2.321  | 0.84   | 1.948  | 1.85  | 1.7  | 1.452 | -0.157 | -17.61  | 1.75 |
| C19 | 1.447  | 1.913  | 1.297  | 1.85  | 1.7  | 1.452 | -0.060 | -11.94  | 1.75 |
| C20 | 3.29   | -0.683 | -0.729 | 1.85  | 1.7  | 1.452 | 0.012  | -16.21  | 1.75 |
| O21 | 3.965  | 0.556  | -0.565 | 2.024 | 1.52 | 1.342 | -0.463 | 2.69    | 0.7  |
| C22 | 1.16   | -2.019 | -0.466 | 1.85  | 1.7  | 1.452 | -0.139 | -16.92  | 1.75 |
| H23 | 1.255  | 0.47   | -1.754 | 1.2   | 1.2  | 1.001 | 0.114  | -35.20  | 0.14 |
| C24 | 4.253  | -1.766 | -0.249 | 1.85  | 1.7  | 1.452 | -0.236 | 36.87   | 1.75 |
| H25 | -3.273 | -2.657 | 0.205  | 1.2   | 1.2  | 1.001 | 0.105  | -35.60  | 0.14 |
| H26 | -5.576 | -1.724 | 0.487  | 1.2   | 1.2  | 1.001 | 0.101  | -35.50  | 0.14 |
| H27 | -5.973 | 0.712  | 0.362  | 1.2   | 1.2  | 1.001 | 0.100  | -35.52  | 0.14 |
| H28 | -4.099 | 2.286  | -0.048 | 1.2   | 1.2  | 1.001 | 0.103  | -35.51  | 0.14 |
| H29 | -1.456 | 3.297  | -1.26  | 1.2   | 1.2  | 1.001 | 0.097  | -35.29  | 0.14 |
| H30 | -1.123 | 3.266  | 0.459  | 1.2   | 1.2  | 1.001 | 0.091  | -35.28  | 0.14 |
| H31 | 0.762  | 2.749  | -1.897 | 1.2   | 1.2  | 1.001 | 0.103  | -35.32  | 0.14 |
| H32 | 1.009  | 3.824  | -0.522 | 1.2   | 1.2  | 1.001 | 0.105  | -35.35  | 0.14 |
| H33 | 0.901  | -0.78  | 1.872  | 1.2   | 1.2  | 1.001 | 0.087  | -35.29  | 0.14 |
| H34 | 2.566  | -1.322 | 1.905  | 1.2   | 1.2  | 1.001 | 0.091  | -35.35  | 0.14 |
| H35 | 2.214  | 0.914  | 3.036  | 1.2   | 1.2  | 1.001 | 0.090  | -35.33  | 0.14 |
| H36 | 3.37   | 1.016  | 1.702  | 1.2   | 1.2  | 1.001 | 0.086  | -35.40  | 0.14 |
| H37 | 0.423  | 1.831  | 1.696  | 1.2   | 1.2  | 1.001 | 0.087  | -35.21  | 0.14 |
| H38 | 1.815  | 2.913  | 1.551  | 1.2   | 1.2  | 1.001 | 0.103  | -35.34  | 0.14 |
| H39 | 3.104  | -0.858 | -1.807 | 1.2   | 1.2  | 1.001 | 0.086  | -35.10  | 0.14 |
| H40 | 3.297  | 1.27   | -0.617 | 1.2   | 1.2  | 1.001 | 0.293  | -19.87  | 0.14 |
| H41 | 1.284  | -2.185 | -1.546 | 1.2   | 1.2  | 1.001 | 0.112  | -35.26  | 0.14 |

|                   |     |        |        |        |        |      |       |        |         |        |
|-------------------|-----|--------|--------|--------|--------|------|-------|--------|---------|--------|
|                   | H42 | 1.613  | -2.878 | 0.033  | 1.2    | 1.2  | 1.001 | 0.110  | -35.40  | 0.14   |
|                   | H43 | 3.87   | -2.773 | -0.434 | 1.2    | 1.2  | 1.001 | 0.087  | -35.38  | 0.14   |
|                   | H44 | 4.472  | -1.66  | 0.817  | 1.2    | 1.2  | 1.001 | 0.086  | -35.37  | 0.14   |
|                   | H45 | 5.196  | -1.656 | -0.791 | 1.2    | 1.2  | 1.001 | 0.089  | -35.38  | 0.14   |
| eburnamonine (16) | C1  | 0.096  | -2.109 | -0.224 | 1.85   | 1.7  | 1.452 | 0.276  | -17.56  | 1.75   |
|                   | C2  | 2.209  | -0.733 | -0.061 | 1.85   | 1.7  | 1.452 | 0.084  | -80.74  | 1.75   |
|                   | C3  | 0.251  | 0.328  | -0.505 | 1.85   | 1.7  | 1.452 | 0.082  | -79.24  | 1.75   |
|                   | C4  | 2.452  | 0.664  | -0.129 | 1.85   | 1.7  | 1.452 | -0.026 | -85.14  | 1.75   |
|                   | C5  | 4.507  | -1.153 | 0.394  | 1.85   | 1.7  | 1.452 | -0.110 | -27.75  | 1.75   |
|                   | C6  | 4.771  | 0.225  | 0.331  | 1.85   | 1.7  | 1.452 | -0.112 | -27.85  | 1.75   |
|                   | C7  | 3.754  | 1.14   | 0.071  | 1.85   | 1.7  | 1.452 | -0.105 | -27.97  | 1.75   |
|                   | C8  | 3.22   | -1.656 | 0.199  | 1.85   | 1.7  | 1.452 | -0.104 | -28.11  | 1.75   |
|                   | C9  | 1.184  | 1.31   | -0.41  | 1.85   | 1.7  | 1.452 | -0.036 | -83.40  | 1.75   |
|                   | C10 | -1.214 | 0.534  | -0.746 | 1.85   | 1.7  | 1.452 | 0.023  | -67.18  | 1.75   |
|                   | C11 | -0.711 | 2.886  | -0.876 | 1.85   | 1.7  | 1.452 | -0.054 | -11.14  | 1.75   |
|                   | C12 | -1.646 | 1.994  | 1.196  | 1.85   | 1.7  | 1.452 | -0.061 | -12.63  | 1.75   |
|                   | C13 | -1.388 | -1.953 | -0.548 | 1.85   | 1.7  | 1.452 | -0.141 | -17.02  | 1.75   |
|                   | C14 | -2.07  | -0.617 | -0.153 | 1.85   | 1.7  | 1.452 | 0.000  | -123.82 | 1.75   |
|                   | C15 | -3.482 | -0.548 | -0.795 | 1.85   | 1.7  | 1.452 | -0.153 | -16.70  | 1.75   |
|                   | C16 | -2.121 | -0.469 | 1.386  | 1.85   | 1.7  | 1.452 | -0.154 | -16.93  | 1.75   |
|                   | C17 | -2.566 | 0.937  | 1.806  | 1.85   | 1.7  | 1.452 | -0.153 | -17.77  | 1.75   |
|                   | C18 | 0.798  | 2.758  | -0.506 | 1.85   | 1.7  | 1.452 | -0.147 | -17.73  | 1.75   |
|                   | C19 | -4.537 | -1.516 | -0.248 | 1.85   | 1.7  | 1.452 | -0.235 | 37.14   | 1.75   |
|                   |     | N20    | -1.597 | 1.88   | -0.269 | 1.89 | 1.55  | 1.397  | -0.358  | -31.78 |
|                   | N21 | 0.834  | -0.931 | -0.297 | 1.89   | 1.55 | 1.397 | -0.245 | 15.79   | 1.23   |
|                   | O22 | 0.608  | -3.185 | 0.032  | 2.024  | 1.52 | 1.342 | -0.336 | -2.48   | 0.7    |
|                   | H23 | 5.319  | -1.844 | 0.599  | 1.2    | 1.2  | 1.001 | 0.100  | -35.51  | 0.14   |
|                   | H24 | 5.785  | 0.581  | 0.487  | 1.2    | 1.2  | 1.001 | 0.099  | -35.51  | 0.14   |
|                   | H25 | 3.966  | 2.204  | 0.023  | 1.2    | 1.2  | 1.001 | 0.103  | -35.51  | 0.14   |
|                   | H26 | 3.001  | -2.715 | 0.25   | 1.2    | 1.2  | 1.001 | 0.104  | -35.57  | 0.14   |
|                   | H27 | -1.396 | 0.535  | -1.833 | 1.2    | 1.2  | 1.001 | 0.110  | -35.21  | 0.14   |
|                   | H28 | -1.078 | 3.88   | -0.598 | 1.2    | 1.2  | 1.001 | 0.101  | -35.34  | 0.14   |
|                   | H29 | -0.819 | 2.796  | -1.964 | 1.2    | 1.2  | 1.001 | 0.099  | -35.31  | 0.14   |
|                   | H30 | -2.012 | 3.001  | 1.431  | 1.2    | 1.2  | 1.001 | 0.099  | -35.31  | 0.14   |
|                   | H31 | -0.648 | 1.897  | 1.66   | 1.2    | 1.2  | 1.001 | 0.082  | -35.16  | 0.14   |
|                   | H32 | -1.48  | -2.097 | -1.634 | 1.2    | 1.2  | 1.001 | 0.110  | -35.26  | 0.14   |
|                   | H33 | -1.885 | -2.806 | -0.08  | 1.2    | 1.2  | 1.001 | 0.107  | -35.39  | 0.14   |
|                   | H34 | -3.363 | -0.727 | -1.872 | 1.2    | 1.2  | 1.001 | 0.084  | -35.28  | 0.14   |
|                   | H35 | -3.849 | 0.48   | -0.708 | 1.2    | 1.2  | 1.001 | 0.084  | -35.34  | 0.14   |
|                   | H36 | -2.779 | -1.233 | 1.813  | 1.2    | 1.2  | 1.001 | 0.089  | -35.34  | 0.14   |
|                   | H37 | -1.123 | -0.66  | 1.802  | 1.2    | 1.2  | 1.001 | 0.086  | -35.29  | 0.14   |
|                   | H38 | -2.541 | 1.027  | 2.898  | 1.2    | 1.2  | 1.001 | 0.090  | -35.33  | 0.14   |
|                   | H39 | -3.6   | 1.123  | 1.494  | 1.2    | 1.2  | 1.001 | 0.087  | -35.33  | 0.14   |
|                   | H40 | 1.008  | 3.263  | 0.447  | 1.2    | 1.2  | 1.001 | 0.089  | -35.27  | 0.14   |
|                   | H41 | 1.393  | 3.287  | -1.261 | 1.2    | 1.2  | 1.001 | 0.094  | -35.30  | 0.14   |

|     |        |        |        |     |     |       |       |        |      |
|-----|--------|--------|--------|-----|-----|-------|-------|--------|------|
| H42 | -5.461 | -1.431 | -0.829 | 1.2 | 1.2 | 1.001 | 0.083 | -35.35 | 0.14 |
| H43 | -4.791 | -1.303 | 0.795  | 1.2 | 1.2 | 1.001 | 0.081 | -35.35 | 0.14 |
| H44 | -4.213 | -2.56  | -0.305 | 1.2 | 1.2 | 1.001 | 0.081 | -35.35 | 0.14 |

Table S2. Solute parameters for the five compounds measured in poly-HEMA/DMSO

|             | X   | Y      | Z      | Coulomb<br>$R$ (Å) | Bondi $R$<br>(Å) | Grimme<br>D2 $R$ (Å) | CM5 $\rho Q$<br>([e]) | $\gamma$ (cal mol <sup>-1</sup><br>Å <sup>-2</sup> ) | $C_6^m$<br>(J nm <sup>6</sup><br>mol <sup>-1</sup> ) |      |
|-------------|-----|--------|--------|--------------------|------------------|----------------------|-----------------------|------------------------------------------------------|------------------------------------------------------|------|
| estrone (2) | C1  | -0.369 | -1.771 | -0.084             | 1.85             | 1.7                  | 1.452                 | -0.153                                               | 5.17                                                 | 1.75 |
|             | C2  | 0.279  | -0.436 | -0.526             | 1.85             | 1.7                  | 1.452                 | -0.073                                               | -48.12                                               | 1.75 |
|             | C3  | -0.465 | 0.795  | 0.06               | 1.85             | 1.7                  | 1.452                 | -0.079                                               | -48.93                                               | 1.75 |
|             | C4  | -1.945 | 0.683  | -0.309             | 1.85             | 1.7                  | 1.452                 | -0.076                                               | -48.64                                               | 1.75 |
|             | C5  | -2.596 | -0.607 | 0.251              | 1.85             | 1.7                  | 1.452                 | -0.015                                               | -101.74                                              | 1.75 |
|             | C6  | -1.89  | -1.83  | -0.345             | 1.85             | 1.7                  | 1.452                 | -0.152                                               | 4.47                                                 | 1.75 |
|             | C7  | 1.787  | -0.36  | -0.267             | 1.85             | 1.7                  | 1.452                 | -0.034                                               | -59.22                                               | 1.75 |
|             | C8  | 2.421  | 0.874  | -0.004             | 1.85             | 1.7                  | 1.452                 | -0.018                                               | -59.89                                               | 1.75 |
|             | C9  | 1.636  | 2.17   | 0.114              | 1.85             | 1.7                  | 1.452                 | -0.148                                               | 3.27                                                 | 1.75 |
|             | C10 | 0.212  | 2.077  | -0.437             | 1.85             | 1.7                  | 1.452                 | -0.153                                               | 3.82                                                 | 1.75 |
|             | C11 | 2.595  | -1.503 | -0.34              | 1.85             | 1.7                  | 1.452                 | -0.108                                               | -6.17                                                | 1.75 |
|             | C12 | 3.974  | -1.454 | -0.153             | 1.85             | 1.7                  | 1.452                 | -0.133                                               | -6.33                                                | 1.75 |
|             | C13 | 4.587  | -0.227 | 0.111              | 1.85             | 1.7                  | 1.452                 | 0.068                                                | -6.28                                                | 1.75 |
|             | C14 | 3.805  | 0.925  | 0.181              | 1.85             | 1.7                  | 1.452                 | -0.128                                               | -6.26                                                | 1.75 |
|             | C15 | -2.952 | 1.799  | 0.038              | 1.85             | 1.7                  | 1.452                 | -0.155                                               | 5.00                                                 | 1.75 |
|             | C16 | -4.316 | 1.123  | -0.234             | 1.85             | 1.7                  | 1.452                 | -0.153                                               | 4.96                                                 | 1.75 |
|             | C17 | -4.058 | -0.395 | -0.156             | 1.85             | 1.7                  | 1.452                 | 0.190                                                | 4.34                                                 | 1.75 |
|             | O18 | -4.876 | -1.261 | -0.381             | 2.024            | 1.52                 | 1.342                 | -0.334                                               | -77.47                                               | 0.7  |
|             | C19 | -2.616 | -0.685 | 1.801              | 1.85             | 1.7                  | 1.452                 | -0.227                                               | 58.47                                                | 1.75 |
|             | H20 | -0.368 | 0.773  | 1.156              | 1.2              | 1.2                  | 1.001                 | 0.090                                                | -34.54                                               | 0.14 |
|             | H21 | 0.137  | -0.372 | -1.619             | 1.2              | 1.2                  | 1.001                 | 0.089                                                | -34.47                                               | 0.14 |
|             | H22 | -1.983 | 0.58   | -1.408             | 1.2              | 1.2                  | 1.001                 | 0.091                                                | -34.46                                               | 0.14 |
|             | O23 | 5.935  | -0.094 | 0.305              | 2.024            | 1.52                 | 1.342                 | -0.400                                               | -67.81                                               | 0.7  |
|             | H24 | -3.103 | 0.182  | 2.259              | 1.2              | 1.2                  | 1.001                 | 0.089                                                | -34.64                                               | 0.14 |
|             | H25 | -3.172 | -1.576 | 2.107              | 1.2              | 1.2                  | 1.001                 | 0.086                                                | -34.66                                               | 0.14 |
|             | H26 | -1.61  | -0.755 | 2.221              | 1.2              | 1.2                  | 1.001                 | 0.091                                                | -34.68                                               | 0.14 |
|             | H27 | -0.158 | -1.939 | 0.979              | 1.2              | 1.2                  | 1.001                 | 0.082                                                | -34.61                                               | 0.14 |
|             | H28 | 0.096  | -2.606 | -0.617             | 1.2              | 1.2                  | 1.001                 | 0.089                                                | -34.65                                               | 0.14 |
|             | H29 | -2.074 | -1.854 | -1.427             | 1.2              | 1.2                  | 1.001                 | 0.084                                                | -34.59                                               | 0.14 |
|             | H30 | -2.309 | -2.758 | 0.059              | 1.2              | 1.2                  | 1.001                 | 0.085                                                | -34.63                                               | 0.14 |
|             | H31 | 2.188  | 2.978  | -0.382             | 1.2              | 1.2                  | 1.001                 | 0.092                                                | -34.60                                               | 0.14 |
|             | H32 | 1.588  | 2.452  | 1.176              | 1.2              | 1.2                  | 1.001                 | 0.090                                                | -34.55                                               | 0.14 |
|             | H33 | 0.229  | 2.075  | -1.536             | 1.2              | 1.2                  | 1.001                 | 0.083                                                | -34.56                                               | 0.14 |
|             | H34 | -0.357 | 2.963  | -0.133             | 1.2              | 1.2                  | 1.001                 | 0.088                                                | -34.62                                               | 0.14 |
|             | H35 | -2.807 | 2.698  | -0.567             | 1.2              | 1.2                  | 1.001                 | 0.088                                                | -34.67                                               | 0.14 |
|             | H36 | -2.862 | 2.1    | 1.088              | 1.2              | 1.2                  | 1.001                 | 0.087                                                | -34.62                                               | 0.14 |
|             | H37 | -4.689 | 1.344  | -1.241             | 1.2              | 1.2                  | 1.001                 | 0.103                                                | -34.61                                               | 0.14 |
|             | H38 | -5.113 | 1.408  | 0.46               | 1.2              | 1.2                  | 1.001                 | 0.102                                                | -34.65                                               | 0.14 |
|             | H39 | 2.146  | -2.468 | -0.551             | 1.2              | 1.2                  | 1.001                 | 0.103                                                | -34.82                                               | 0.14 |
|             | H40 | 4.568  | -2.363 | -0.216             | 1.2              | 1.2                  | 1.001                 | 0.107                                                | -34.77                                               | 0.14 |
|             | H41 | 4.297  | 1.873  | 0.383              | 1.2              | 1.2                  | 1.001                 | 0.104                                                | -34.78                                               | 0.14 |



|               |       |        |        |        |       |       |       |        |        |      |
|---------------|-------|--------|--------|--------|-------|-------|-------|--------|--------|------|
| retrosine (3) | H42   | 6.35   | -0.963 | 0.224  | 1.2   | 1.2   | 1.001 | 0.358  | -19.57 | 0.14 |
|               | C1    | -2.234 | -0.125 | -1.162 | 1.85  | 1.7   | 1.452 | 0.026  | 4.59   | 1.75 |
|               | C2    | -3.684 | 0.344  | -0.978 | 1.85  | 1.7   | 1.452 | -0.152 | 4.17   | 1.75 |
|               | C3    | -4.12  | -0.378 | 0.305  | 1.85  | 1.7   | 1.452 | -0.060 | -0.25  | 1.75 |
|               | N4    | -3.438 | -1.675 | 0.239  | 1.89  | 1.55  | 1.397 | -0.368 | 46.22  | 1.23 |
|               | C5    | -2.344 | -1.613 | -0.762 | 1.85  | 1.7   | 1.452 | 0.019  | -52.94 | 1.75 |
|               | C6    | -2.928 | -2.238 | 1.494  | 1.85  | 1.7   | 1.452 | -0.052 | -1.63  | 1.75 |
|               | C7    | -1.53  | -2.672 | 1.155  | 1.85  | 1.7   | 1.452 | -0.081 | -4.20  | 1.75 |
|               | C8    | -1.188 | -2.321 | -0.088 | 1.85  | 1.7   | 1.452 | -0.023 | -58.90 | 1.75 |
|               | O9    | -1.345 | 0.537  | -0.228 | 2.024 | 1.52  | 1.342 | -0.190 | -68.74 | 0.7  |
|               | C10   | -1.05  | 1.841  | -0.478 | 1.85  | 1.7   | 1.452 | 0.261  | 56.15  | 1.75 |
|               | C11   | -0.062 | 2.37   | 0.516  | 1.85  | 1.7   | 1.452 | -0.030 | -58.58 | 1.75 |
|               | O12   | -1.534 | 2.463  | -1.405 | 2.024 | 1.52  | 1.342 | -0.329 | -77.34 | 0.7  |
|               | C13   | -0.142 | 3.636  | 0.965  | 1.85  | 1.7   | 1.452 | -0.068 | -4.08  | 1.75 |
|               | C14   | -1.146 | 4.696  | 0.626  | 1.85  | 1.7   | 1.452 | -0.229 | 56.18  | 1.75 |
|               | C15   | 1.03   | 1.418  | 0.955  | 1.85  | 1.7   | 1.452 | -0.155 | 4.20   | 1.75 |
|               | C16   | 2.024  | 1.102  | -0.2   | 1.85  | 1.7   | 1.452 | -0.078 | -47.62 | 1.75 |
|               | C17   | 0.089  | -2.691 | -0.775 | 1.85  | 1.7   | 1.452 | -0.034 | 56.09  | 1.75 |
|               | O18   | 1.043  | -1.586 | -0.853 | 2.024 | 1.52  | 1.342 | -0.187 | -71.04 | 0.7  |
|               | C19   | 1.797  | -1.384 | 0.232  | 1.85  | 1.7   | 1.452 | 0.263  | 57.81  | 1.75 |
|               | C20   | 2.79   | -0.222 | 0.066  | 1.85  | 1.7   | 1.452 | 0.077  | -48.17 | 1.75 |
|               | O21   | 1.727  | -2.032 | 1.261  | 2.024 | 1.52  | 1.342 | -0.318 | -77.30 | 0.7  |
|               | C22   | 2.973  | 2.288  | -0.426 | 1.85  | 1.7   | 1.452 | -0.236 | 57.73  | 1.75 |
|               | O23   | 3.544  | -0.145 | 1.273  | 2.024 | 1.52  | 1.342 | -0.432 | -63.42 | 0.7  |
|               | C24   | 3.785  | -0.595 | -1.052 | 1.85  | 1.7   | 1.452 | -0.063 | 58.03  | 1.75 |
|               | O25   | 4.413  | -1.829 | -0.754 | 2.024 | 1.52  | 1.342 | -0.462 | -63.43 | 0.7  |
|               | H26   | -2.628 | -2.153 | -1.683 | 1.2   | 1.2   | 1.001 | 0.102  | -34.46 | 0.14 |
|               | H27   | -1.92  | 4.342  | -0.052 | 1.2   | 1.2   | 1.001 | 0.087  | -34.76 | 0.14 |
|               | H28   | -1.607 | 5.086  | 1.542  | 1.2   | 1.2   | 1.001 | 0.093  | -34.60 | 0.14 |
|               | H29   | -0.644 | 5.546  | 0.147  | 1.2   | 1.2   | 1.001 | 0.096  | -34.60 | 0.14 |
|               | H30   | 3.684  | 2.37   | 0.401  | 1.2   | 1.2   | 1.001 | 0.083  | -34.66 | 0.14 |
|               | H31   | 3.538  | 2.197  | -1.358 | 1.2   | 1.2   | 1.001 | 0.087  | -34.66 | 0.14 |
|               | H32   | 2.401  | 3.219  | -0.483 | 1.2   | 1.2   | 1.001 | 0.081  | -34.65 | 0.14 |
|               | H33   | -4.271 | -0.008 | -1.833 | 1.2   | 1.2   | 1.001 | 0.101  | -34.63 | 0.14 |
|               | H34   | -3.772 | 1.429  | -0.932 | 1.2   | 1.2   | 1.001 | 0.096  | -34.74 | 0.14 |
|               | H35   | -5.209 | -0.495 | 0.364  | 1.2   | 1.2   | 1.001 | 0.092  | -34.60 | 0.14 |
|               | H36   | -3.803 | 0.197  | 1.192  | 1.2   | 1.2   | 1.001 | 0.087  | -34.48 | 0.14 |
|               | H37   | -3.54  | -3.083 | 1.848  | 1.2   | 1.2   | 1.001 | 0.093  | -34.51 | 0.14 |
|               | H38   | -2.928 | -1.494 | 2.31   | 1.2   | 1.2   | 1.001 | 0.098  | -34.47 | 0.14 |
|               | H39   | 0.569  | 0.497  | 1.322  | 1.2   | 1.2   | 1.001 | 0.088  | -34.67 | 0.14 |
|               | H40   | 1.586  | 1.851  | 1.792  | 1.2   | 1.2   | 1.001 | 0.096  | -34.65 | 0.14 |
|               | H41   | -0.082 | -2.955 | -1.822 | 1.2   | 1.2   | 1.001 | 0.123  | -34.67 | 0.14 |
|               | H42   | 0.576  | -3.523 | -0.264 | 1.2   | 1.2   | 1.001 | 0.117  | -34.71 | 0.14 |
|               | H43   | 4.521  | 0.212  | -1.154 | 1.2   | 1.2   | 1.001 | 0.102  | -34.60 | 0.14 |
| H44           | 3.263 | -0.716 | -2.005 | 1.2    | 1.2   | 1.001 | 0.110 | -34.67 | 0.14   |      |

|                |     |        |        |        |       |      |       |        |        |      |
|----------------|-----|--------|--------|--------|-------|------|-------|--------|--------|------|
|                | H45 | -1.853 | 0.035  | -2.173 | 1.2   | 1.2  | 1.001 | 0.113  | -34.69 | 0.14 |
|                | H46 | 1.442  | 0.937  | -1.115 | 1.2   | 1.2  | 1.001 | 0.095  | -34.60 | 0.14 |
|                | H47 | -0.89  | -3.211 | 1.846  | 1.2   | 1.2  | 1.001 | 0.111  | -34.81 | 0.14 |
|                | H48 | 0.614  | 3.934  | 1.692  | 1.2   | 1.2  | 1.001 | 0.106  | -34.72 | 0.14 |
|                | H49 | 3.113  | -0.766 | 1.888  | 1.2   | 1.2  | 1.001 | 0.321  | -19.50 | 0.14 |
|                | H50 | 4.758  | -1.72  | 0.146  | 1.2   | 1.2  | 1.001 | 0.324  | -19.54 | 0.14 |
| aquatolide (4) | C1  | -1.65  | -0.308 | -1.242 | 1.85  | 1.7  | 1.452 | 0.028  | 6.96   | 1.75 |
|                | C2  | -1.996 | -1.149 | 0.044  | 1.85  | 1.7  | 1.452 | -0.007 | -99.93 | 1.75 |
|                | C3  | -0.724 | -0.722 | 0.823  | 1.85  | 1.7  | 1.452 | -0.058 | -46.79 | 1.75 |
|                | C4  | -0.45  | 0.774  | 0.303  | 1.85  | 1.7  | 1.452 | -0.006 | -98.92 | 1.75 |
|                | O5  | -2.279 | 0.994  | -1.123 | 2.024 | 1.52 | 1.342 | -0.209 | -67.98 | 0.7  |
|                | C6  | -1.65  | 1.626  | -0.087 | 1.85  | 1.7  | 1.452 | 0.252  | 57.16  | 1.75 |
|                | O7  | -2.002 | 2.695  | 0.346  | 2.024 | 1.52 | 1.342 | -0.338 | -77.66 | 0.7  |
|                | C8  | 0.429  | -1.145 | -0.141 | 1.85  | 1.7  | 1.452 | -0.077 | -48.26 | 1.75 |
|                | C9  | -0.139 | -0.014 | -1.013 | 1.85  | 1.7  | 1.452 | -0.077 | -49.79 | 1.75 |
|                | C10 | 0.625  | 1.553  | 1.06   | 1.85  | 1.7  | 1.452 | -0.150 | 3.75   | 1.75 |
|                | C11 | 1.718  | 2.165  | 0.177  | 1.85  | 1.7  | 1.452 | -0.144 | 2.88   | 1.75 |
|                | C12 | 1.857  | -1.02  | 0.399  | 1.85  | 1.7  | 1.452 | 0.190  | 2.90   | 1.75 |
|                | C13 | 2.866  | -0.112 | -0.26  | 1.85  | 1.7  | 1.452 | -0.032 | -58.17 | 1.75 |
|                | C14 | 2.764  | 1.224  | -0.364 | 1.85  | 1.7  | 1.452 | -0.088 | -3.79  | 1.75 |
|                | O15 | 2.213  | -1.796 | 1.273  | 2.024 | 1.52 | 1.342 | -0.323 | -77.18 | 0.7  |
|                | C16 | 4.099  | -0.853 | -0.732 | 1.85  | 1.7  | 1.452 | -0.226 | 56.80  | 1.75 |
|                | H17 | 0.381  | -2.167 | -0.527 | 1.2   | 1.2  | 1.001 | 0.110  | -34.66 | 0.14 |
|                | H18 | 0.406  | 0.434  | -1.845 | 1.2   | 1.2  | 1.001 | 0.101  | -34.71 | 0.14 |
|                | H19 | -1.957 | -0.734 | -2.197 | 1.2   | 1.2  | 1.001 | 0.123  | -34.73 | 0.14 |
|                | C20 | -2.098 | -2.655 | -0.265 | 1.85  | 1.7  | 1.452 | -0.228 | 57.96  | 1.75 |
|                | C21 | -3.293 | -0.729 | 0.758  | 1.85  | 1.7  | 1.452 | -0.234 | 57.88  | 1.75 |
|                | H22 | -0.674 | -0.945 | 1.891  | 1.2   | 1.2  | 1.001 | 0.104  | -34.69 | 0.14 |
|                | H23 | 3.853  | -1.602 | -1.495 | 1.2   | 1.2  | 1.001 | 0.089  | -34.60 | 0.14 |
|                | H24 | 4.549  | -1.392 | 0.108  | 1.2   | 1.2  | 1.001 | 0.089  | -34.64 | 0.14 |
|                | H25 | 4.838  | -0.166 | -1.152 | 1.2   | 1.2  | 1.001 | 0.093  | -34.68 | 0.14 |
|                | H26 | -1.999 | -3.248 | 0.651  | 1.2   | 1.2  | 1.001 | 0.088  | -34.63 | 0.14 |
|                | H27 | -1.348 | -3.011 | -0.975 | 1.2   | 1.2  | 1.001 | 0.090  | -34.68 | 0.14 |
|                | H28 | -3.078 | -2.875 | -0.699 | 1.2   | 1.2  | 1.001 | 0.089  | -34.65 | 0.14 |
|                | H29 | -3.485 | -1.421 | 1.585  | 1.2   | 1.2  | 1.001 | 0.088  | -34.63 | 0.14 |
|                | H30 | -4.149 | -0.772 | 0.078  | 1.2   | 1.2  | 1.001 | 0.087  | -34.65 | 0.14 |
|                | H31 | -3.255 | 0.279  | 1.177  | 1.2   | 1.2  | 1.001 | 0.084  | -34.69 | 0.14 |
|                | H32 | 0.106  | 2.358  | 1.591  | 1.2   | 1.2  | 1.001 | 0.095  | -34.63 | 0.14 |
|                | H33 | 1.09   | 0.927  | 1.829  | 1.2   | 1.2  | 1.001 | 0.094  | -34.63 | 0.14 |
|                | H34 | 1.26   | 2.72   | -0.656 | 1.2   | 1.2  | 1.001 | 0.098  | -34.53 | 0.14 |
|                | H35 | 2.25   | 2.931  | 0.758  | 1.2   | 1.2  | 1.001 | 0.100  | -34.57 | 0.14 |
|                | H36 | 3.598  | 1.734  | -0.849 | 1.2   | 1.2  | 1.001 | 0.102  | -34.71 | 0.14 |
| menthol (8)    | C1  | 1.607  | 1.036  | -0.141 | 1.85  | 1.7  | 1.452 | -0.161 | 4.28   | 1.75 |
|                | C2  | 0.112  | 1.146  | 0.191  | 1.85  | 1.7  | 1.452 | 0.006  | 4.59   | 1.75 |
|                | C3  | -0.68  | -0.065 | -0.349 | 1.85  | 1.7  | 1.452 | -0.084 | -47.84 | 1.75 |

|                           |        |        |        |       |      |       |        |         |      |
|---------------------------|--------|--------|--------|-------|------|-------|--------|---------|------|
| C4                        | -0.047 | -1.372 | 0.171  | 1.85  | 1.7  | 1.452 | -0.156 | 4.52    | 1.75 |
| C5                        | 1.446  | -1.474 | -0.174 | 1.85  | 1.7  | 1.452 | -0.157 | 4.28    | 1.75 |
| C6                        | 2.242  | -0.272 | 0.359  | 1.85  | 1.7  | 1.452 | -0.081 | -49.30  | 1.75 |
| C7                        | 3.728  | -0.357 | -0.006 | 1.85  | 1.7  | 1.452 | -0.235 | 57.60   | 1.75 |
| O8                        | -0.418 | 2.392  | -0.268 | 2.024 | 1.52 | 1.342 | -0.456 | -63.42  | 0.7  |
| C9                        | -2.208 | 0.056  | -0.1   | 1.85  | 1.7  | 1.452 | -0.084 | -48.44  | 1.75 |
| C10                       | -3.008 | -0.921 | -0.975 | 1.85  | 1.7  | 1.452 | -0.238 | 57.76   | 1.75 |
| C11                       | -2.613 | -0.086 | 1.376  | 1.85  | 1.7  | 1.452 | -0.238 | 57.80   | 1.75 |
| H12                       | 3.865  | -0.352 | -1.094 | 1.2   | 1.2  | 1.001 | 0.078  | -34.61  | 0.14 |
| H13                       | 4.289  | 0.49   | 0.403  | 1.2   | 1.2  | 1.001 | 0.080  | -34.63  | 0.14 |
| H14                       | 4.18   | -1.277 | 0.381  | 1.2   | 1.2  | 1.001 | 0.080  | -34.63  | 0.14 |
| H15                       | -2.814 | -1.966 | -0.704 | 1.2   | 1.2  | 1.001 | 0.078  | -34.60  | 0.14 |
| H16                       | -4.084 | -0.752 | -0.862 | 1.2   | 1.2  | 1.001 | 0.078  | -34.64  | 0.14 |
| H17                       | -2.762 | -0.803 | -2.037 | 1.2   | 1.2  | 1.001 | 0.078  | -34.61  | 0.14 |
| H18                       | -2.076 | 0.618  | 2.019  | 1.2   | 1.2  | 1.001 | 0.080  | -34.65  | 0.14 |
| H19                       | -3.682 | 0.116  | 1.496  | 1.2   | 1.2  | 1.001 | 0.079  | -34.65  | 0.14 |
| H20                       | -2.428 | -1.097 | 1.754  | 1.2   | 1.2  | 1.001 | 0.078  | -34.64  | 0.14 |
| H21                       | 2.126  | 1.906  | 0.277  | 1.2   | 1.2  | 1.001 | 0.083  | -34.62  | 0.14 |
| H22                       | 1.726  | 1.094  | -1.235 | 1.2   | 1.2  | 1.001 | 0.084  | -34.51  | 0.14 |
| H23                       | -0.582 | -2.238 | -0.236 | 1.2   | 1.2  | 1.001 | 0.084  | -34.61  | 0.14 |
| H24                       | -0.161 | -1.426 | 1.262  | 1.2   | 1.2  | 1.001 | 0.083  | -34.58  | 0.14 |
| H25                       | 1.567  | -1.527 | -1.267 | 1.2   | 1.2  | 1.001 | 0.079  | -34.53  | 0.14 |
| H26                       | 1.861  | -2.407 | 0.228  | 1.2   | 1.2  | 1.001 | 0.082  | -34.59  | 0.14 |
| H27                       | -0.001 | 1.19   | 1.281  | 1.2   | 1.2  | 1.001 | 0.101  | -34.61  | 0.14 |
| H28                       | -0.541 | -0.054 | -1.445 | 1.2   | 1.2  | 1.001 | 0.086  | -34.46  | 0.14 |
| H29                       | 2.162  | -0.282 | 1.458  | 1.2   | 1.2  | 1.001 | 0.085  | -34.51  | 0.14 |
| H30                       | -2.474 | 1.074  | -0.412 | 1.2   | 1.2  | 1.001 | 0.080  | -34.59  | 0.14 |
| H31                       | -0.305 | 2.414  | -1.229 | 1.2   | 1.2  | 1.001 | 0.328  | -19.55  | 0.14 |
| cryptospirolepine<br>(17) |        |        |        |       |      |       |        |         |      |
| C1                        | -5.222 | 1.325  | -0.959 | 1.85  | 1.7  | 1.452 | -0.110 | -6.06   | 1.75 |
| C2                        | -3.851 | 1.005  | -0.912 | 1.85  | 1.7  | 1.452 | -0.039 | -61.83  | 1.75 |
| C3                        | -2.911 | 2.001  | -1.319 | 1.85  | 1.7  | 1.452 | 0.084  | -69.58  | 1.75 |
| C4                        | -3.309 | 3.261  | -1.779 | 1.85  | 1.7  | 1.452 | -0.113 | -6.39   | 1.75 |
| C5                        | -4.669 | 3.534  | -1.828 | 1.85  | 1.7  | 1.452 | -0.118 | -6.09   | 1.75 |
| C6                        | -5.616 | 2.576  | -1.416 | 1.85  | 1.7  | 1.452 | -0.128 | -6.06   | 1.75 |
| C7                        | -3.064 | -0.133 | -0.493 | 1.85  | 1.7  | 1.452 | 0.067  | -68.47  | 1.75 |
| C8                        | -1.742 | 0.21   | -0.626 | 1.85  | 1.7  | 1.452 | 0.071  | -67.42  | 1.75 |
| N9                        | -1.646 | 1.49   | -1.148 | 1.89  | 1.55 | 1.397 | -0.406 | 46.22   | 1.23 |
| N10                       | -3.457 | -1.37  | 0.019  | 1.89  | 1.55 | 1.397 | -0.287 | 46.22   | 1.23 |
| C11                       | -2.479 | -2.174 | 0.603  | 1.85  | 1.7  | 1.452 | 0.098  | -68.19  | 1.75 |
| C12                       | -1.098 | -1.857 | 0.508  | 1.85  | 1.7  | 1.452 | -0.027 | -58.93  | 1.75 |
| C13                       | -0.582 | -0.679 | -0.33  | 1.85  | 1.7  | 1.452 | 0.113  | -104.95 | 1.75 |
| C14                       | -2.855 | -3.318 | 1.339  | 1.85  | 1.7  | 1.452 | -0.116 | -5.98   | 1.75 |
| C15                       | -1.905 | -4.128 | 1.947  | 1.85  | 1.7  | 1.452 | -0.106 | -6.47   | 1.75 |
| C16                       | -0.547 | -3.817 | 1.855  | 1.85  | 1.7  | 1.452 | -0.125 | -6.40   | 1.75 |

|     |        |        |        |       |      |       |        |        |      |
|-----|--------|--------|--------|-------|------|-------|--------|--------|------|
| C17 | -0.166 | -2.687 | 1.139  | 1.85  | 1.7  | 1.452 | -0.104 | -6.32  | 1.75 |
| C18 | -0.015 | -1.265 | -1.699 | 1.85  | 1.7  | 1.452 | 0.137  | 3.27   | 1.75 |
| C19 | 1.388  | -1.164 | -2.017 | 1.85  | 1.7  | 1.452 | -0.160 | -5.28  | 1.75 |
| C20 | 2.28   | -0.503 | -1.202 | 1.85  | 1.7  | 1.452 | 0.003  | -62.63 | 1.75 |
| C21 | 1.796  | 0.118  | -0.023 | 1.85  | 1.7  | 1.452 | 0.080  | -69.98 | 1.75 |
| N22 | 0.478  | 0.075  | 0.388  | 1.89  | 1.55 | 1.397 | -0.252 | 46.22  | 1.23 |
| C23 | 3.723  | -0.36  | -1.383 | 1.85  | 1.7  | 1.452 | -0.022 | -61.14 | 1.75 |
| C24 | 4.504  | 0.403  | -0.457 | 1.85  | 1.7  | 1.452 | 0.108  | -67.73 | 1.75 |
| N25 | 3.913  | 1.046  | 0.63   | 1.89  | 1.55 | 1.397 | -0.251 | 46.22  | 1.23 |
| C26 | 2.563  | 0.842  | 0.875  | 1.85  | 1.7  | 1.452 | 0.097  | -68.71 | 1.75 |
| C27 | 4.383  | -0.973 | -2.467 | 1.85  | 1.7  | 1.452 | -0.090 | -6.23  | 1.75 |
| C28 | 5.748  | -0.861 | -2.657 | 1.85  | 1.7  | 1.452 | -0.108 | -6.51  | 1.75 |
| C29 | 6.507  | -0.125 | -1.738 | 1.85  | 1.7  | 1.452 | -0.090 | -6.44  | 1.75 |
| C30 | 5.9    | 0.492  | -0.657 | 1.85  | 1.7  | 1.452 | -0.104 | -6.04  | 1.75 |
| C31 | -4.782 | -1.901 | -0.263 | 1.85  | 1.7  | 1.452 | -0.110 | 52.38  | 1.75 |
| C32 | 4.673  | 1.996  | 1.433  | 1.85  | 1.7  | 1.452 | -0.102 | 52.58  | 1.75 |
| C33 | 0.39   | 0.751  | 1.596  | 1.85  | 1.7  | 1.452 | 0.096  | -68.58 | 1.75 |
| C34 | 1.687  | 1.25   | 1.947  | 1.85  | 1.7  | 1.452 | -0.030 | -61.70 | 1.75 |
| C35 | 1.836  | 1.933  | 3.172  | 1.85  | 1.7  | 1.452 | -0.098 | -6.07  | 1.75 |
| C36 | 0.729  | 2.128  | 3.984  | 1.85  | 1.7  | 1.452 | -0.117 | -6.15  | 1.75 |
| C37 | -0.54  | 1.649  | 3.606  | 1.85  | 1.7  | 1.452 | -0.101 | -6.12  | 1.75 |
| C38 | -0.724 | 0.953  | 2.42   | 1.85  | 1.7  | 1.452 | -0.110 | -6.38  | 1.75 |
| O39 | -0.837 | -1.811 | -2.427 | 2.294 | 1.52 | 1.342 | -0.366 | -77.03 | 0.7  |
| H40 | -5.202 | -1.374 | -1.119 | 1.2   | 1.2  | 1.001 | 0.113  | -34.74 | 0.14 |
| H41 | -4.713 | -2.96  | -0.53  | 1.2   | 1.2  | 1.001 | 0.108  | -34.65 | 0.14 |
| H42 | -5.472 | -1.801 | 0.587  | 1.2   | 1.2  | 1.001 | 0.101  | -34.56 | 0.14 |
| H43 | 5.324  | 2.593  | 0.79   | 1.2   | 1.2  | 1.001 | 0.118  | -34.68 | 0.14 |
| H44 | 3.982  | 2.679  | 1.921  | 1.2   | 1.2  | 1.001 | 0.119  | -34.78 | 0.14 |
| H45 | 5.287  | 1.501  | 2.195  | 1.2   | 1.2  | 1.001 | 0.113  | -34.61 | 0.14 |
| H46 | -5.973 | 0.615  | -0.631 | 1.2   | 1.2  | 1.001 | 0.105  | -34.83 | 0.14 |
| H47 | -2.575 | 4      | -2.085 | 1.2   | 1.2  | 1.001 | 0.111  | -34.81 | 0.14 |
| H48 | -5.007 | 4.503  | -2.184 | 1.2   | 1.2  | 1.001 | 0.101  | -34.80 | 0.14 |
| H49 | -6.673 | 2.822  | -1.452 | 1.2   | 1.2  | 1.001 | 0.098  | -34.80 | 0.14 |
| H50 | -3.905 | -3.557 | 1.454  | 1.2   | 1.2  | 1.001 | 0.108  | -34.85 | 0.14 |
| H51 | -2.231 | -4.999 | 2.508  | 1.2   | 1.2  | 1.001 | 0.106  | -34.80 | 0.14 |
| H52 | 0.201  | -4.443 | 2.331  | 1.2   | 1.2  | 1.001 | 0.101  | -34.81 | 0.14 |
| H53 | 0.888  | -2.437 | 1.058  | 1.2   | 1.2  | 1.001 | 0.103  | -34.80 | 0.14 |
| H54 | 1.685  | -1.643 | -2.943 | 1.2   | 1.2  | 1.001 | 0.099  | -34.84 | 0.14 |
| H55 | 3.793  | -1.555 | -3.167 | 1.2   | 1.2  | 1.001 | 0.112  | -34.82 | 0.14 |
| H56 | 6.225  | -1.347 | -3.502 | 1.2   | 1.2  | 1.001 | 0.109  | -34.81 | 0.14 |
| H57 | 7.583  | -0.042 | -1.86  | 1.2   | 1.2  | 1.001 | 0.113  | -34.80 | 0.14 |
| H58 | 6.517  | 1.028  | 0.053  | 1.2   | 1.2  | 1.001 | 0.115  | -34.86 | 0.14 |
| H59 | 2.804  | 2.287  | 3.505  | 1.2   | 1.2  | 1.001 | 0.111  | -34.85 | 0.14 |
| H60 | 0.845  | 2.652  | 4.928  | 1.2   | 1.2  | 1.001 | 0.104  | -34.80 | 0.14 |
| H61 | -1.391 | 1.816  | 4.26   | 1.2   | 1.2  | 1.001 | 0.107  | -34.80 | 0.14 |

|     |        |       |        |     |     |       |       |        |      |
|-----|--------|-------|--------|-----|-----|-------|-------|--------|------|
| H62 | -1.697 | 0.571 | 2.139  | 1.2 | 1.2 | 1.001 | 0.104 | -34.86 | 0.14 |
| H63 | -0.785 | 1.999 | -1.263 | 1.2 | 1.2 | 1.001 | 0.356 | 0.00   | 0.14 |

# Experimental vs Predicted RDC/RCSA Values

Table S3. strychnine (1) in PMMA/chloroform<sup>1</sup>

| strychnine (1) | RDC (Hz)            | P1A (Hz) | P2A (Hz) | P1B (Hz) | P2B (Hz) |
|----------------|---------------------|----------|----------|----------|----------|
| C6             | -17.7               | -12.5    | -15.7    | -15.3    | -17.9    |
| C3             | -17.3               | -12.4    | -15.5    | -15.1    | -17.6    |
| C13            | 17.5                | 18.8     | 18.5     | 18.8     | 16.7     |
| C14            | 5.2                 | 2.4      | 3.2      | 8.0      | 3.9      |
| C11            | 9.0                 | 9.2      | 11.9     | 15.6     | 6.0      |
| C17            | 0.5                 | -2.6     | -3.1     | 1.8      | 0.7      |
| C20            | 15.3                | 17.5     | 17.7     | 16.5     | 17.2     |
| C22            | -10.6               | -12.4    | -11.9    | -14.5    | -12.6    |
| C4             | -10.4               | -13.9    | -13.0    | -15.9    | -11.1    |
| C5             | -8.3                | -16.4    | -16.6    | -16.4    | -5.0     |
| C19*           | 5.1                 | 8.5      | 9.8      | 12.2     | 4.7      |
| C21*           | -3.3                | -2.1     | -2.2     | -0.6     | -1.8     |
| C12*           | 2.7                 | 7.1      | 6.5      | 9.1      | 2.0      |
| C16*           | 7.6                 | 9.1      | 10.7     | 11.7     | 7.6      |
| C24*           | -5.7                | -5.0     | -6.3     | -5.7     | -6.5     |
| C23*           | -4.3                | -0.1     | 0.4      | -1.6     | -3.7     |
|                | RCSA (Hz @ 150 MHz) | P1A (Hz) | P2A (Hz) | P1B (Hz) | P2B (Hz) |
| C3             | 10.5                | 10.3     | 11.4     | 11.7     | 9.6      |
| C4             | 9.2                 | 10.5     | 10.7     | 11.7     | 8.4      |
| C6             | 9.1                 | 9.9      | 10.8     | 11.3     | 8.7      |
| C1             | 6.6                 | 7.8      | 7.9      | 8.8      | 6.2      |
| C2             | 7.7                 | 9.2      | 9.7      | 10.0     | 6.5      |
| C7             | -0.1                | -0.7     | -0.8     | -0.7     | -0.2     |
| C22            | 0.2                 | -0.5     | -0.4     | -0.1     | -0.2     |
| C9             | 6.2                 | 6.5      | 7.0      | 8.2      | 4.8      |
| C12            | -1.0                | -2.0     | -1.9     | -2.2     | -0.9     |
| C14            | 0.2                 | 0.1      | 0.1      | 0.3      | 0.3      |
| C20            | 0.4                 | 0.7      | 0.8      | 0.9      | 0.6      |
| C11            | -1.8                | -2.1     | -2.4     | -2.5     | -1.8     |
| C23            | 1.4                 | 0.9      | 0.9      | 1.3      | 1.1      |
| C24            | 2.8                 | 3.1      | 3.5      | 3.7      | 2.6      |
| C17            | 3.2                 | 2.8      | 3.7      | 1.9      | 3.1      |
| C16            | -0.5                | -1.6     | -1.7     | -2.1     | -0.3     |
| C18            | 5.5                 | 5.2      | 6.4      | 4.9      | 5.7      |
| C5             | 8.9                 | 11.5     | 12.0     | 12.4     | 7.5      |
| C19            | 0.0                 | -0.8     | -0.8     | -1.1     | -0.1     |
| C21            | -1.1                | -1.2     | -1.3     | -1.3     | -1.1     |

\* methylene RDC is reported as the average of the two  $^1D_{CH}$ 's when the F1-coupled HSQC is used for RDC measurement.

Table S4. estrone (2) in PMMA/chloroform<sup>2</sup>

| estrone (2) | RDC (Hz)            | P1A (Hz) | P2A (Hz) | P1B (Hz) | P2B (Hz) |
|-------------|---------------------|----------|----------|----------|----------|
| C11         | -16.2               | -8.4     | -14.8    | -7.0     | -11.9    |
| C12         | -6.7                | -9.7     | -6.2     | -10.2    | -4.0     |
| C14         | -16.3               | -8.6     | -14.7    | -7.2     | -12.2    |
| C2          | 12.0                | 19.8     | 15.2     | 19.5     | 17.9     |
| C3          | 13.5                | 20.6     | 15.5     | 20.1     | 18.1     |
| C4          | 14.0                | 20.2     | 14.7     | 19.8     | 17.5     |
| C19         | -3.8                | -6.3     | -4.8     | -6.0     | -5.1     |
| C9*         | 2.2                 | 9.6      | 4.7      | 8.8      | 3.2      |
| C16*        | 10.0                | 8.8      | 9.7      | 8.0      | 8.8      |
| C1*         | 3.8                 | 8.4      | 6.1      | 8.0      | 8.9      |
| C15*        | 4.1                 | 11.0     | 5.6      | 10.4     | 6.7      |
| C10*        | 3.6                 | 7.2      | 5.5      | 6.5      | 7.4      |
| C6*         | 0.9                 | 8.9      | 4.0      | 8.5      | 4.0      |
|             | RCSA (Hz @ 150 MHz) | P1A (Hz) | P2A (Hz) | P1B (Hz) | P2B (Hz) |
| C17         | 4.7                 | 6.6      | 5.2      | 6.1      | 4.4      |
| C13         | 1.1                 | 6.9      | 4.3      | 6.3      | 4.5      |
| C8          | 6.0                 | 8.1      | 6.3      | 7.7      | 5.6      |
| C7          | 5.3                 | 8.2      | 5.7      | 7.6      | 5.6      |
| C11         | 7.7                 | 7.1      | 6.9      | 6.5      | 6.0      |
| C14         | 4.4                 | 5.3      | 5.3      | 4.9      | 4.7      |
| C12         | 3.1                 | 5.3      | 3.9      | 5.1      | 3.3      |
| C4          | -1.3                | -1.1     | -0.7     | -1.0     | -0.8     |
| C5          | 0.0                 | -0.4     | 0.2      | -0.4     | 0.0      |
| C3          | -0.5                | -0.1     | 0.0      | -0.1     | 0.1      |
| C16         | -1.6                | -1.2     | -1.2     | -1.1     | -1.0     |
| C6          | -0.8                | 0.0      | -0.1     | -0.1     | 0.0      |
| C9          | -0.4                | -1.0     | -0.5     | -1.0     | -0.5     |
| C10         | -0.7                | 0.0      | -0.3     | 0.0      | -0.4     |
| C1          | -0.7                | -0.5     | -0.4     | -0.5     | -0.6     |
| C15         | -0.5                | -1.0     | -0.4     | -0.9     | -0.5     |
| C19         | 0.1                 | 1.1      | 0.6      | 1.0      | 0.5      |
| C2          | -0.1                | 0.3      | 0.4      | 0.2      | 0.4      |

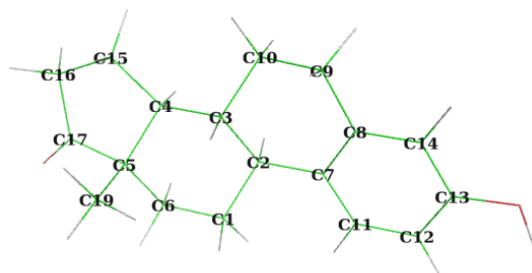

\* methylene RDC is reported as the average of the two  $^1D_{CH}$ 's when the F1-coupled HSQC is used for RDC measurement.

Note that a mixed solvent system of 95%  $CDCl_3$  and 5%  $DMSO-d_6$  (v/v) was used to prevent self-association of estrone.

Table S5. retrorsine (**3**) in PMMA/chloroform<sup>2</sup>

| retrorsine ( <b>3</b> ) | RDC (Hz)            | P1A (Hz) | P2A (Hz) | P1B (Hz) | P2B (Hz) |
|-------------------------|---------------------|----------|----------|----------|----------|
| C13                     | -0.2                | 13.0     | 0.6      | 13.9     | 10.3     |
| C5                      | 26.2                | 37.3     | 31.1     | 37.5     | 34.0     |
| C1                      | 46.5                | 49.8     | 45.2     | 49.5     | 49.4     |
| C16                     | 16.2                | 36.4     | 26.3     | 37.7     | 34.1     |
| C14                     | 8.9                 | 9.5      | 5.1      | 8.8      | 8.0      |
| C22                     | 6.2                 | 6.1      | 8.9      | 7.2      | 7.5      |
| C24*                    | 2.6                 | 9.9      | -0.4     | 8.8      | 6.3      |
| C6*                     | 7.9                 | 4.2      | 1.2      | 2.3      | 1.1      |
| C17*                    | 16.0                | 23.2     | 25.6     | 24.1     | 23.2     |
| C3*                     | -7.1                | -2.1     | -8.5     | -1.7     | -2.7     |
| C15*                    | 5.5                 | 8.2      | 0.1      | 6.3      | 4.0      |
| C2*                     | 0.5                 | 1.5      | 1.8      | 1.0      | -0.8     |
|                         | RCSA (Hz @ 125 MHz) | P1A (Hz) | P2A (Hz) | P1B (Hz) | P2B (Hz) |
| C19                     | 1.7                 | -2.8     | 1.2      | -2.5     | -1.5     |
| C10                     | 2.9                 | 3.0      | 5.0      | 3.8      | 4.5      |
| C7                      | 7.9                 | 6.9      | 4.4      | 6.0      | 5.0      |
| C13                     | 7.7                 | 3.1      | 3.5      | 2.5      | 3.0      |
| C11                     | 6.2                 | 3.3      | 3.2      | 2.6      | 2.9      |
| C8                      | 7.0                 | 5.6      | 2.9      | 4.5      | 3.6      |
| C20                     | -1.2                | -1.2     | -0.9     | -1.0     | -1.0     |
| C5                      | -2.3                | -2.8     | -2.3     | -2.7     | -2.3     |
| C1                      | -2.6                | -2.2     | -2.5     | -2.2     | -2.3     |
| C24                     | -1.2                | -2.5     | -1.0     | -2.4     | -2.1     |
| C6                      | 1.5                 | 2.1      | 2.5      | 2.3      | 2.3      |
| C17                     | -2.2                | -3.9     | -4.6     | -4.2     | -4.2     |
| C3                      | -1.8                | -2.8     | -0.7     | -2.7     | -2.4     |
| C15                     | -1.3                | -1.7     | -1.2     | -1.5     | -1.4     |
| C16                     | -1.5                | -1.7     | -0.9     | -1.5     | -1.4     |
| C2                      | -1.8                | -1.8     | -1.1     | -1.7     | -1.4     |
| C14                     | -0.9                | -1.4     | -0.8     | -1.3     | -1.0     |
| C22                     | 0.5                 | -0.3     | -0.8     | -0.4     | -0.4     |

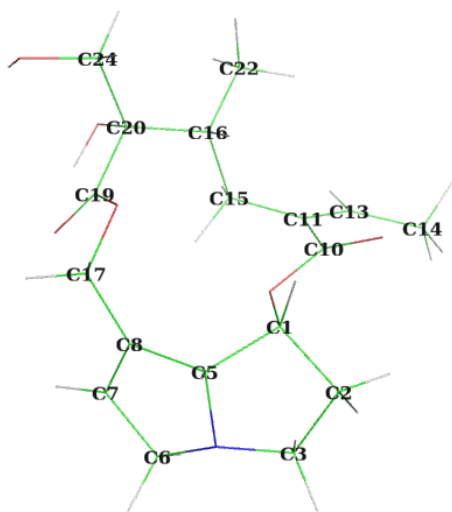

\* methylene RDC is reported as the average of the two  $^1D_{CH}$ 's when the F1-coupled HSQC is used for RDC measurement.

Note that a mixed solvent system of 95%  $CDCl_3$  and 5%  $DMSO-d_6$  (v/v) was used to prevent self-association of retrorsine.



Table S6. aquatolide (4) in PMMA/chloroform<sup>2</sup>

| aquatolide (4) | RDC (Hz)            | P1A (Hz) | P2A (Hz) | P1B (Hz) | P2B (Hz) |
|----------------|---------------------|----------|----------|----------|----------|
| C14            | -8.3                | -7.1     | -8.0     | -6.1     | -7.3     |
| C1             | 11.0                | 9.6      | 8.8      | 9.1      | 8.2      |
| C9             | 0.7                 | 1.0      | 0.7      | 2.7      | 1.2      |
| C8             | -0.8                | -1.8     | 0.6      | -2.9     | -2.5     |
| C3             | 10.7                | 12.2     | 11.3     | 13.2     | 12.0     |
| C35            | -1.2                | 0.6      | 0.1      | -0.9     | -1.7     |
| C11#           | 5.2                 | 8.3      | 7.3      | 8.1      | 8.3      |
| C11#           | 0.1                 | 2.0      | 1.6      | 1.8      | 1.3      |
| C20            | 1.2                 | 0.8      | 0.1      | 1.2      | 1.1      |
| C21            | 0.9                 | 2.0      | 1.8      | 1.6      | 1.3      |
| C10*           | 3.8                 | 2.2      | 3.4      | 2.3      | 3.2      |
| C11*           | 2.5                 | 4.4      | 3.7      | 3.6      | 3.3      |
|                | RCSA (Hz @ 150 MHz) | P1A (Hz) | P2A (Hz) | P1B (Hz) | P2B (Hz) |
| C12            | 2.1                 | 1.1      | 2.1      | 1.2      | 1.5      |
| C6             | -1.3                | -1.5     | -0.8     | -1.2     | -1.1     |
| C13            | 3.0                 | 3.5      | 3.2      | 3.1      | 2.9      |
| C14            | 3.0                 | 3.3      | 3.1      | 2.9      | 2.9      |
| C1             | -0.4                | -0.4     | -0.2     | -0.5     | -0.3     |
| C4             | 0.0                 | -0.4     | -0.5     | -0.4     | -0.4     |
| C3             | 0.6                 | 0.5      | 0.4      | 0.4      | 0.4      |
| C2             | 0.2                 | -0.1     | 0.0      | -0.1     | 0.0      |
| C11            | 0.1                 | -0.2     | -0.2     | -0.2     | -0.2     |
| C20            | -0.1                | -0.3     | -0.1     | -0.3     | -0.3     |
| C21            | -0.3                | -0.6     | -0.5     | -0.5     | -0.5     |

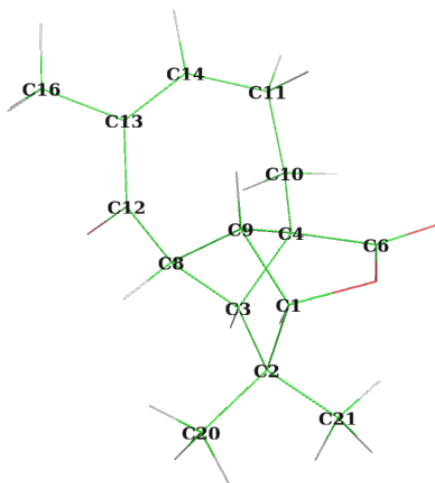

\* methylene RDC is reported as the average of the two  $^1D_{CH}$ 's when the F1-coupled HSQC is used for RDC measurement.

# both  $^1D_{CH}$ 's for the methylene group are reported when the F2-coupled HSQC is used for RDC measurement. The diastereotopic methylene protons is stereospecifically assigned by doing SVD fitting for both possibilities and keeping the better fit. Note that RDC's measured from different experiments on the same NMR sample can be directly combined for data analysis, so methylene RDCs may have reported values for both the average by the F1-coupled HSQC and the two separate RDC's from the F2-coupled HSQC.

Table S7. caulamidine A (5) in PMMA/chloroform<sup>2</sup>

| caulamidine A (5) | RDC (Hz)            | P1A (Hz) | P2A (Hz) | P1B (Hz) | P2B (Hz) |
|-------------------|---------------------|----------|----------|----------|----------|
| C23               | 29.9                | 15.8     | 7.1      | 22.9     | 22.5     |
| C6                | -7.3                | -15.2    | -22.4    | -11.6    | -12.0    |
| C4                | -34.5               | -36.1    | -34.4    | -35.8    | -35.6    |
| C1                | -39.0               | -36.1    | -34.1    | -36.0    | -35.9    |
| C21               | -40.0               | -43.0    | -44.6    | -41.4    | -37.7    |
| C24               | -37.6               | -42.8    | -44.5    | -41.0    | -37.7    |
| C26               | 25.1                | 26.9     | 25.3     | 28.5     | 32.2     |
| C29               | 16.5                | 11.6     | 10.2     | 12.2     | 11.4     |
| C17               | 18.5                | 10.8     | 9.0      | 11.8     | 10.2     |
| C28*              | 25.0                | 20.2     | 19.0     | 21.2     | 19.9     |
|                   | RCSA (Hz @ 150 MHz) | P1A (Hz) | P2A (Hz) | P1B (Hz) | P2B (Hz) |
| C12               | 15.8                | 5.4      | 3.5      | 6.2      | 4.8      |
| C8                | 13.1                | 6.6      | 4.5      | 7.9      | 9.2      |
| C19               | 12.5                | 4.2      | 2.8      | 4.7      | 2.3      |
| C2                | 6.7                 | 5.5      | 4.4      | 6.1      | 9.1      |
| C20               | 2.4                 | 2.5      | 3.9      | 1.2      | -0.6     |
| C23               | 0.5                 | 1.9      | 3.5      | 0.2      | -1.3     |
| C6                | 7.6                 | 8.6      | 9.7      | 8.1      | 9.5      |
| C22               | 10.7                | 1.4      | -0.2     | 2.2      | 0.2      |
| C5                | 1.9                 | 0.8      | -0.6     | 1.6      | 4.2      |
| C4                | 12.5                | 11.5     | 10.9     | 11.4     | 12.7     |
| C1                | 12.5                | 11.7     | 11.4     | 11.7     | 13.1     |
| C3                | 8.6                 | 9.4      | 10.1     | 9.0      | 10.8     |
| C21               | 12.5                | 10.1     | 10.7     | 9.3      | 7.2      |
| C24               | 12.8                | 9.9      | 10.5     | 9.1      | 7.0      |
| C10               | 0.5                 | 0.7      | 0.7      | 0.6      | 0.7      |
| C26               | 0.0                 | -1.5     | -2.0     | -1.2     | -2.0     |
| C28               | -3.6                | -3.2     | -3.7     | -2.9     | -2.8     |
| C14               | -3.1                | -2.6     | -3.1     | -2.3     | -2.5     |
| C11               | -0.8                | -0.3     | -0.1     | -0.4     | -0.3     |
| C17               | -6.8                | -4.2     | -3.6     | -4.6     | -3.8     |
| C29               | -5.3                | -4.2     | -4.0     | -4.3     | -3.9     |
| C9                | 2.1                 | 0.6      | 0.1      | 0.9      | 0.5      |
| C15               | -1.4                | -0.7     | -0.5     | -0.9     | -0.5     |

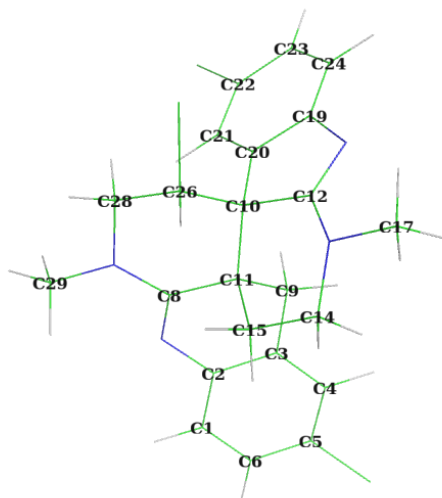

\* methylene RDC is reported as the average of the two  $^1D_{CH}$ 's when the F1-coupled HSQC is used for RDC measurement.

Table S8. 10-epi-8-deoxycumambrin B (**6**) in PMMA/chloroform<sup>3</sup>

| 10-epi-8-deoxycumambrin B ( <b>6</b> )                                            | RDC (Hz) | P1A (Hz) | P2A (Hz) | P1B (Hz) | P2B (Hz) |
|-----------------------------------------------------------------------------------|----------|----------|----------|----------|----------|
| 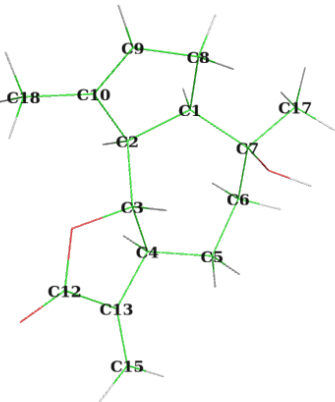 |          |          |          |          |          |
| C1                                                                                | 8.0      | 25.3     | 22.5     | 22.3     | 24.9     |
| C9                                                                                | -13.0    | -12.5    | -12.9    | -14.4    | -10.6    |
| C2                                                                                | 29.3     | 30.3     | 30.4     | 31.2     | 32.0     |
| C3                                                                                | 34.2     | 29.8     | 31.2     | 32.8     | 32.0     |
| C4                                                                                | 27.2     | 32.6     | 32.6     | 33.8     | 34.7     |
| C18                                                                               | -0.8     | 4.6      | 3.4      | 1.1      | 2.6      |
| C17                                                                               | 5.8      | 5.0      | 5.2      | 5.5      | 6.6      |
| C15*                                                                              | -14.0    | -15.6    | -15.6    | -12.7    | -13.5    |
| C8*                                                                               | 4.4      | 9.7      | 8.5      | 5.8      | 5.3      |

\* methylene RDC is reported as the average of the two  $^1D_{CH}$ 's when the F1-coupled HSQC is used for RDC measurement.

Note that because the original RDC data were collected in a compressed PMMA gel, their signs are inverted here to be consistent with a stretched gel model.

Table S9. mefloquine (**7**) in PMMA/chloroform<sup>1</sup>

| mefloquine ( <b>7</b> )                                                             | RCSA (Hz @ 150 MHz) | P1A (Hz) | P2A (Hz) | P1B (Hz) | P2B (Hz) |
|-------------------------------------------------------------------------------------|---------------------|----------|----------|----------|----------|
| 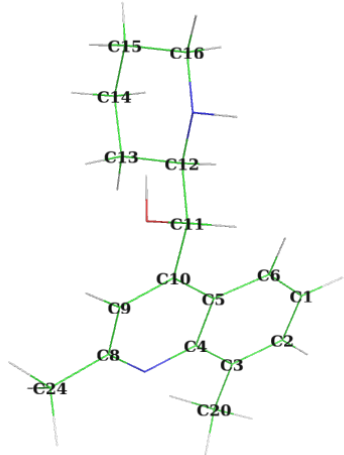 |                     |          |          |          |          |
| C10                                                                                 | 42.5                | 41.8     | 40.5     | 40.6     | 39.4     |
| C8                                                                                  | 24.8                | 31.0     | 24.5     | 17.6     | 15.5     |
| C4                                                                                  | 38.2                | 38.8     | 36.2     | 31.2     | 31.9     |
| C3                                                                                  | 26.6                | 31.4     | 30.6     | 35.5     | 31.3     |
| C2                                                                                  | 43.5                | 39.7     | 40.6     | 35.2     | 41.4     |
| C1                                                                                  | 29.4                | 36.6     | 29.0     | 23.9     | 21.5     |
| C6                                                                                  | 31.1                | 35.2     | 29.4     | 35.8     | 26.3     |
| C5                                                                                  | 39.0                | 42.2     | 38.4     | 36.1     | 33.7     |
| C20                                                                                 | -0.4                | -1.1     | -1.0     | 1.2      | -0.4     |
| C24                                                                                 | -0.8                | -0.9     | -2.0     | -2.1     | -3.7     |
| C9                                                                                  | 43.2                | 39.8     | 41.4     | 35.6     | 39.9     |
| C11                                                                                 | -0.6                | 0.3      | -0.1     | 1.2      | -2.0     |
| C12                                                                                 | -1.6                | -2.9     | -3.7     | -4.5     | -0.6     |
| C16                                                                                 | 2.6                 | 1.9      | -0.1     | 0.6      | 5.6      |
| C15                                                                                 | 1.4                 | 0.5      | 0.7      | 1.0      | 1.8      |
| C13                                                                                 | -1.0                | -0.7     | -1.2     | -1.4     | -0.2     |
| C14                                                                                 | 0.0                 | -1.2     | -1.5     | -1.6     | -0.8     |

Table S10. menthol (**8**) in PMMA/chloroform<sup>1</sup>

| menthol ( <b>8</b> )                                                              | RCSA (Hz @ 150 MHz) | P1A (Hz) | P2A (Hz) | P1B (Hz) | P2B (Hz) |      |
|-----------------------------------------------------------------------------------|---------------------|----------|----------|----------|----------|------|
| 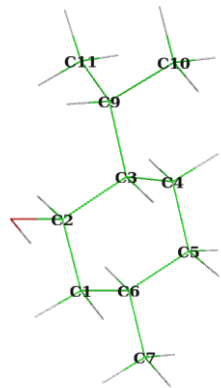 | C2                  | -0.1     | -0.3     | -0.4     | -0.3     | -0.4 |
|                                                                                   | C3                  | -0.2     | -0.2     | -0.4     | -0.3     | -0.3 |
|                                                                                   | C1                  | -2.4     | -1.5     | -1.6     | -1.7     | -1.8 |
|                                                                                   | C5                  | -0.8     | -0.9     | -1.0     | -0.9     | -0.9 |
|                                                                                   | C6                  | -0.4     | -0.8     | -0.8     | -0.7     | -0.7 |
|                                                                                   | C9                  | -0.8     | -0.5     | -0.5     | -0.5     | -0.5 |
|                                                                                   | C4                  | -1.3     | -0.9     | -1.0     | -1.0     | -1.0 |
|                                                                                   | C7                  | -3.1     | -2.7     | -2.9     | -2.8     | -2.9 |
|                                                                                   | C10                 | 0.6      | 0.2      | 0.5      | 0.4      | 0.5  |
|                                                                                   | C11                 | 1.0      | 1.4      | 1.2      | 1.3      | 1.2  |

Table S11. ludartin (**9**) in PMMA/chloroform<sup>4</sup>

| ludartin ( <b>9</b> )                                                               | RDC (Hz)         | P1A (Hz) | P2A (Hz) | P1B (Hz) | P2B (Hz) |       |
|-------------------------------------------------------------------------------------|------------------|----------|----------|----------|----------|-------|
| 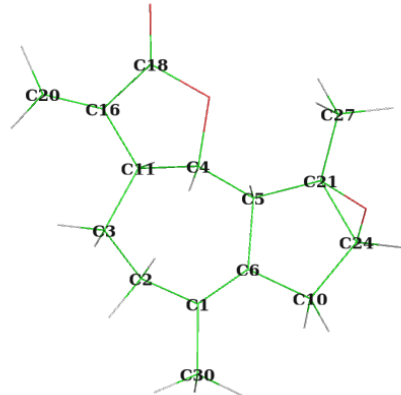 | C10 <sup>#</sup> | -27.0    | -1.5     | 5.5      | -1.0     | -0.7  |
|                                                                                     | C10 <sup>#</sup> | 85.0     | 80.9     | 73.9     | 82.3     | 85.1  |
|                                                                                     | C24              | 7.0      | -10.6    | -15.4    | -11.8    | -17.6 |
|                                                                                     | C5               | 98.0     | 82.8     | 77.1     | 83.9     | 84.8  |
|                                                                                     | C4               | 97.0     | 79.1     | 71.6     | 80.6     | 83.2  |
|                                                                                     | C11              | 81.0     | 91.1     | 91.2     | 90.1     | 93.2  |
|                                                                                     | C2 <sup>#</sup>  | 89.0     | 87.5     | 83.3     | 87.7     | 90.9  |
|                                                                                     | C2 <sup>#</sup>  | -34.0    | -42.7    | -34.8    | -43.2    | -38.0 |
|                                                                                     | C20 <sup>#</sup> | -34.0    | -44.9    | -44.8    | -40.7    | -42.1 |
|                                                                                     | C20 <sup>#</sup> | -38.0    | -44.3    | -34.0    | -45.9    | -42.8 |

<sup>#</sup> both <sup>1</sup>D<sub>CH</sub>'s for the methylene group are reported when the F2-coupled HSQC is used for RDC measurement. The diastereotopic methylene protons is stereospecifically assigned by doing SVD fitting for both possibilities and keeping the better fit.

Table S12. parthenolide (**10**) in PMMA/chloroform<sup>2</sup>

| parthenolide ( <b>10</b> ) | RCSA (Hz @<br>150 MHz) | P1A<br>(Hz) | P2A<br>(Hz) | P1B<br>(Hz) | P2B<br>(Hz) |
|----------------------------|------------------------|-------------|-------------|-------------|-------------|
| C12                        | 15.8                   | 7.7         | 12.4        | 8.0         | 9.0         |
| C13                        | 13.8                   | 17.2        | 16.3        | 16.4        | 15.4        |
| C5                         | 3.0                    | -1.1        | 3.1         | 1.1         | 5.0         |
| C6                         | 0.3                    | -3.3        | -1.1        | -1.6        | 1.3         |
| C16                        | 23.6                   | 22.9        | 22.8        | 23.2        | 23.4        |
| C7                         | -4.8                   | -5.5        | -5.6        | -5.2        | -5.0        |
| C4                         | 7.1                    | 4.9         | 5.9         | 5.1         | 5.8         |
| C3                         | 9.9                    | 5.0         | 6.1         | 6.4         | 8.2         |
| C8                         | 0.5                    | -0.5        | -0.3        | -0.4        | -0.3        |
| C10                        | -1.5                   | -1.0        | -1.2        | -1.4        | -1.9        |
| C2                         | 2.4                    | 1.8         | 2.8         | 1.5         | 1.6         |
| C9                         | -1.1                   | -2.5        | -2.7        | -2.3        | -2.3        |
| C1                         | -4.6                   | -2.7        | -3.0        | -2.9        | -3.0        |
| C17                        | 5.4                    | 3.8         | 4.6         | 4.0         | 4.3         |
| C18                        | 2.6                    | 0.2         | 0.4         | 0.8         | 1.2         |

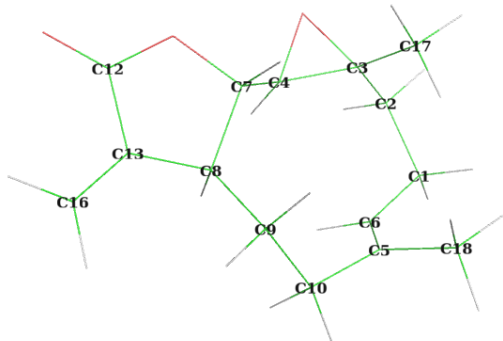

Table S13. yohimbine (**11**) in PMMA/chloroform<sup>5</sup>

| yohimbine ( <b>11</b> ) | RDC<br>(Hz) | P1A<br>(Hz) | P2A<br>(Hz) | P1B<br>(Hz) | P2B<br>(Hz) |
|-------------------------|-------------|-------------|-------------|-------------|-------------|
| C10                     | 29.5        | 30.0        | 30.0        | 29.5        | 27.8        |
| C4                      | -6.4        | -16.5       | -20.8       | -13.1       | -12.2       |
| C5                      | -20.6       | -13.8       | -15.5       | -12.1       | -13.4       |
| C6                      | -10.1       | -20.3       | -13.2       | -20.9       | -22.0       |
| C1                      | -9.4        | -16.7       | -20.8       | -13.2       | -12.4       |
| C15                     | 30.5        | 31.3        | 31.1        | 30.9        | 29.4        |
| C18                     | 32.2        | 32.5        | 32.0        | 31.9        | 30.8        |
| C19                     | -4.2        | 0.8         | -3.6        | -0.9        | 2.1         |
| C16                     | 30.3        | 31.8        | 31.5        | 31.2        | 29.8        |
| C12*                    | 7.6         | 8.8         | 9.5         | 8.3         | 9.2         |
| C14*                    | 10.4        | 9.2         | 9.4         | 9.9         | 9.5         |
| C20*                    | 9.8         | 9.3         | 11.5        | 8.8         | 7.0         |
| C21*                    | 7.9         | 9.1         | 9.0         | 9.7         | 9.5         |
| C17*                    | 9.3         | 8.6         | 8.5         | 9.3         | 9.1         |

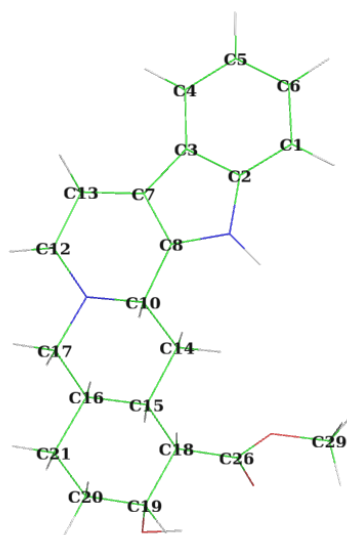

\* methylene RDC is reported as the average of the two  $^1D_{CH}$ 's when the F1-coupled HSQC is used for RDC measurement.

Note that because the original RDC data were collected in a compressed PMMA gel, their signs are inverted here to be consistent with a stretched gel model.

Table S14. santonin (**12**) in PMMA/chloroform<sup>6</sup>

| santonin ( <b>12</b> )                                                            | RDC (Hz) | P1A (Hz) | P2A (Hz) | P1B (Hz) | P2B (Hz) |       |
|-----------------------------------------------------------------------------------|----------|----------|----------|----------|----------|-------|
| 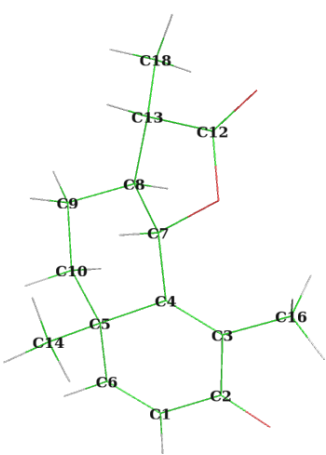 | C1       | -28.3    | -27.8    | -28.5    | -27.4    | -32.7 |
|                                                                                   | C6       | 1.6      | -22.8    | -17.0    | -21.5    | -13.8 |
|                                                                                   | C7       | 36.5     | 39.3     | 38.6     | 39.7     | 34.4  |
|                                                                                   | C8       | 38.8     | 37.9     | 36.3     | 39.6     | 34.3  |
|                                                                                   | C13      | 32.2     | 29.8     | 30.8     | 30.0     | 25.7  |
|                                                                                   | C16      | -3.8     | 5.9      | 4.0      | 5.8      | 3.4   |
|                                                                                   | C14      | -10.7    | -12.5    | -11.9    | -12.6    | -10.9 |
|                                                                                   | C18      | 4.8      | -3.7     | -2.3     | -2.5     | -1.2  |
|                                                                                   | C9*      | 20.4     | 23.9     | 20.6     | 25.1     | 24.2  |
|                                                                                   | C10*     | 20.1     | 12.6     | 14.5     | 13.5     | 14.0  |

\* methylene RDC is reported as the average of the two  $^1D_{CH}$ 's when the F1-coupled HSQC is used for RDC measurement.

Note that because the original RDC data were collected in a compressed PMMA gel, their signs are inverted here to be consistent with a stretched gel model.

Table S15. sesquiterpenoid-13 (**13**) in PMMA/chloroform<sup>7</sup>

| sesquiterpenoid-13 ( <b>13</b> )                                                    | RDC (Hz)            | P1A (Hz) | P2A (Hz) | P1B (Hz) | P2B (Hz) |      |
|-------------------------------------------------------------------------------------|---------------------|----------|----------|----------|----------|------|
| 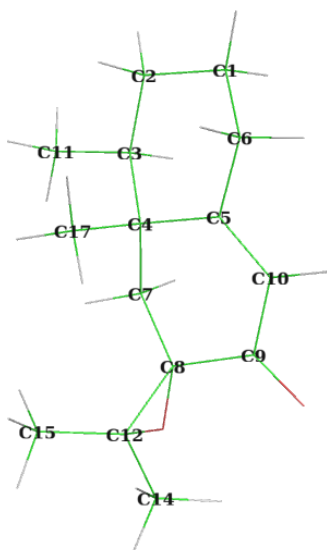 | C3                  | 12.0     | 12.3     | 12.3     | 11.9     | 12.1 |
|                                                                                     | C10                 | -2.4     | -2.2     | -0.3     | -3.5     | -3.3 |
|                                                                                     | C11                 | 0.5      | 0.5      | 0.1      | 0.9      | 0.8  |
|                                                                                     | C17                 | -3.4     | -3.1     | -3.1     | -3.0     | -3.0 |
|                                                                                     | C6*                 | 5.6      | 5.8      | 6.6      | 5.0      | 5.3  |
|                                                                                     | C1*                 | 2.7      | 3.9      | 4.0      | 4.0      | 3.8  |
|                                                                                     | C2*                 | 2.8      | 3.5      | 2.6      | 3.7      | 3.8  |
|                                                                                     | C7*                 | 4.6      | 4.1      | 4.9      | 3.5      | 3.3  |
|                                                                                     | C14/15 <sup>1</sup> | 0.2      | -0.2     | -0.2     | -0.2     | -0.1 |

\* methylene RDC is reported as the average of the two  $^1D_{CH}$ 's when the F1-coupled HSQC is used for RDC measurement.

<sup>1</sup> the average of the two methyl RDC's from the isopropyl group is reported without stereospecific assignment.

Note that because the original RDC data were collected in a compressed PMMA gel, their signs are inverted here to be consistent with a stretched gel model.

Table S16. artemisinin (14) in PMMA/chloroform<sup>8</sup>

| artemisinin (14)                                                                  |      | RDC (Hz) | P1A (Hz) | P2A (Hz) | P1B (Hz) | P2B (Hz) |
|-----------------------------------------------------------------------------------|------|----------|----------|----------|----------|----------|
| 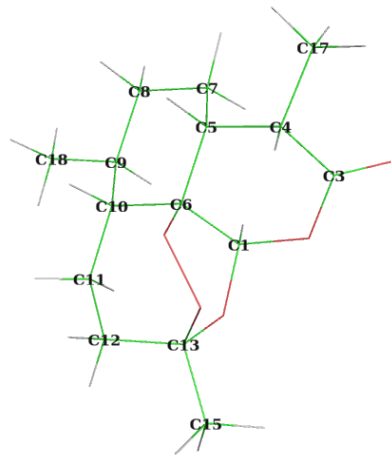 | C10  | 23.8     | 22.0     | 23.4     | 20.4     | 20.8     |
|                                                                                   | C9   | 21.4     | 23.3     | 24.4     | 21.4     | 21.5     |
|                                                                                   | C5   | 20.8     | 21.0     | 22.5     | 19.6     | 20.0     |
|                                                                                   | C4   | 10.3     | 11.3     | 12.1     | 9.1      | 8.0      |
|                                                                                   | C1   | 12.0     | 13.2     | 14.1     | 11.2     | 10.7     |
|                                                                                   | C15  | 2.4      | 4.0      | 3.0      | 3.5      | 3.5      |
|                                                                                   | C18  | 3.9      | 4.3      | 3.9      | 3.1      | 1.8      |
|                                                                                   | C17  | 4.7      | 3.5      | 4.8      | 3.8      | 5.0      |
|                                                                                   | C12* | 7.6      | 10.1     | 7.9      | 7.8      | 5.8      |
|                                                                                   | C11* | 8.5      | 9.4      | 9.4      | 9.1      | 10.3     |
|                                                                                   | C8*  | 12.5     | 12.3     | 14.0     | 11.1     | 11.0     |
|                                                                                   | C7*  | 2.4      | 5.8      | 4.7      | 4.5      | 2.7      |

\* methylene RDC is reported as the average of the two  $^1D_{CH}$ 's when the F1-coupled HSQC is used for RDC measurement.

Note that because the original RDC data were collected in a compressed PMMA gel, their signs are inverted here to be consistent with a stretched gel model.

Table S17. 19-OH-eburnamonine (15) in PMMA/chloroform<sup>9</sup>

| 19-OH-eburnamonine (15)                                                             |      | RDC (Hz) | P1A (Hz) | P2A (Hz) | P1B (Hz) | P2B (Hz) |
|-------------------------------------------------------------------------------------|------|----------|----------|----------|----------|----------|
| 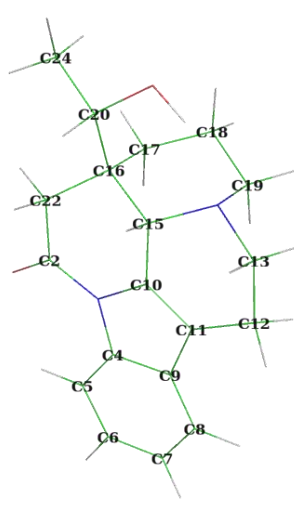 | C8   | -20.8    | -16.3    | -23.2    | -17.3    | -16.3    |
|                                                                                     | C7   | -19.8    | -23.9    | -18.9    | -24.5    | -23.8    |
|                                                                                     | C6   | -10.6    | -17.0    | -15.1    | -15.1    | -14.5    |
|                                                                                     | C5   | -20.4    | -16.6    | -23.6    | -17.6    | -16.6    |
|                                                                                     | C15  | 21.6     | 30.7     | 33.3     | 33.8     | 35.6     |
|                                                                                     | C20  | 38.6     | 35.5     | 35.8     | 34.9     | 33.5     |
|                                                                                     | C24  | 5.4      | 4.0      | 5.2      | 4.9      | 5.5      |
|                                                                                     | C13* | 14.0     | 13.4     | 12.7     | 14.0     | 14.6     |
|                                                                                     | C12* | 12.9     | 15.9     | 15.0     | 15.1     | 14.5     |
|                                                                                     | C19* | -6.0     | -13.0    | -11.3    | -12.0    | -10.8    |
|                                                                                     | C18* | 7.9      | 6.6      | 11.2     | 8.7      | 9.8      |
|                                                                                     | C17* | -16.4    | -14.3    | -13.1    | -14.3    | -14.3    |
|                                                                                     | C22* | 8.2      | 12.9     | 10.8     | 12.8     | 12.6     |

\* methylene RDC is reported as the average of the two  $^1D_{CH}$ 's when the F1-coupled HSQC is used for RDC measurement.

Note that because the original RDC data were collected in a compressed PMMA gel, their signs are inverted here to be consistent with a stretched gel model.

Table S18. eburnamonine (**16**) in PMMA/chloroform<sup>5</sup>

| eburnamonine ( <b>16</b> )                                                        | RDC (Hz) | P1A (Hz) | P2A (Hz) | P1B (Hz) | P2B (Hz) |       |
|-----------------------------------------------------------------------------------|----------|----------|----------|----------|----------|-------|
| 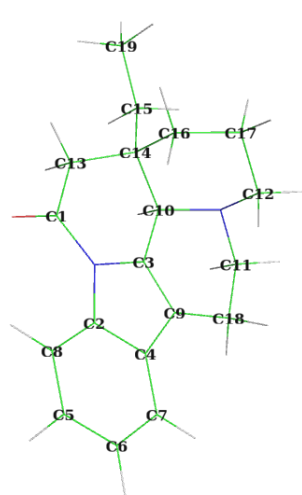 | C8       | -16.7    | -12.2    | -17.4    | -12.8    | -14.2 |
|                                                                                   | C5       | -10.9    | -12.2    | -13.3    | -10.4    | -10.9 |
|                                                                                   | C6       | -16.7    | -19.5    | -15.2    | -18.3    | -15.2 |
|                                                                                   | C7       | -14.5    | -12.0    | -17.2    | -12.6    | -14.0 |
|                                                                                   | C10      | 26.8     | 24.0     | 26.1     | 25.2     | 28.3  |
|                                                                                   | C13*     | 8.9      | 9.8      | 9.2      | 9.2      | 8.8   |
|                                                                                   | C12*     | -9.6     | -9.3     | -9.5     | -8.0     | -6.8  |
|                                                                                   | C11*     | 11.4     | 10.6     | 9.6      | 10.5     | 10.6  |
|                                                                                   | C18*     | 11.9     | 11.9     | 12.5     | 10.8     | 10.6  |
|                                                                                   | C17*     | 8.0      | 5.8      | 8.6      | 7.2      | 9.6   |
|                                                                                   | C16*     | -11.7    | -11.0    | -10.0    | -10.4    | -9.9  |

\* methylene RDC is reported as the average of the two  $^1D_{CH}$ 's when the F1-coupled HSQC is used for RDC measurement.

Note that because the original RDC data were collected in a compressed PMMA gel, their signs are inverted here to be consistent with a stretched gel model.



Table S19. Estrone (2) in poly-HEMA/DMSO

| estrone (2) | RDC (Hz)  | P1A (Hz) | P2A (Hz) | P1B (Hz) | P2B (Hz) |
|-------------|-----------|----------|----------|----------|----------|
| C11         | 1.0       | -5.0     | -1.4     | -1.0     | -7.4     |
| C12         | 10.1      | -12.8    | -9.9     | 27.2     | 20.0     |
| C14         | 3.1       | -6.2     | -2.8     | -6.3     | -11.8    |
| C2          | 30.7      | 33.2     | 37.1     | 31.7     | 32.0     |
| C3          | 35.6      | 34.2     | 37.0     | 34.0     | 34.1     |
| C4          | 35.6      | 34.0     | 35.8     | 36.2     | 35.2     |
| C19         | -11.4     | -10.2    | -9.6     | -10.8    | -11.2    |
| C9*         | 14.6      | 16.4     | 8.3      | 17.7     | 18.9     |
| C16*        | 10.3      | 10.8     | 8.0      | 9.6      | 12.0     |
| C10*        | 24.0      | 13.2     | 12.5     | 35.0     | 31.3     |
| C6*         | 13.3      | 17.0     | 14.0     | 18.5     | 19.0     |
|             | RCSA (Hz) | P1A (Hz) | P2A (Hz) | P1B (Hz) | P2B (Hz) |
| C17         | 9.3       | 9.4      | 6.0      | 6.9      | 8.4      |
| C13         | 19.4      | 12.2     | 9.5      | 19.3     | 18.9     |
| C8          | 9.7       | 12.2     | 9.2      | 8.2      | 10.2     |
| C7          | 18.9      | 13.8     | 10.6     | 19.7     | 19.9     |
| C11         | 8.8       | 9.7      | 6.5      | 9.9      | 11.9     |
| C14         | 6.1       | 7.3      | 5.5      | 7.4      | 8.8      |
| C12         | 5.3       | 7.9      | 5.9      | 2.3      | 4.0      |
| C4          | -3.3      | -2.0     | -1.9     | -2.9     | -2.8     |
| C5          | -1.9      | -1.1     | -1.0     | -1.9     | -1.6     |
| C2          | 1.6       | 0.4      | 0.3      | 1.5      | 1.4      |
| C3          | -0.1      | -0.2     | 0.1      | -0.5     | -0.5     |
| C16         | 0.5       | -1.4     | -0.9     | 0.2      | -0.4     |
| C6          | 1.7       | 0.1      | -0.3     | 1.5      | 1.2      |
| C9          | -1.6      | -1.9     | -1.6     | -2.5     | -2.4     |
| C10         | 0.4       | 0.0      | -0.3     | -0.4     | -0.3     |
| C1          | -1.1      | -1.0     | -1.2     | -2.1     | -1.8     |
| C15         | -2.2      | -1.9     | -1.5     | -2.4     | -2.4     |
| C19         | 2.1       | 1.8      | 1.3      | 1.7      | 1.9      |

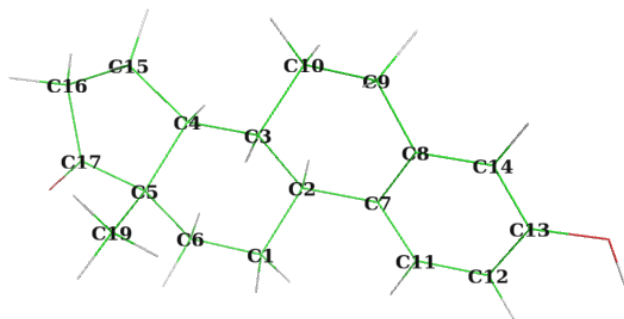

\* methylene RDC is reported as the average of the two  $^1D_{CH}$ 's when the F1-coupled HSQC is used for RDC measurement.

Data were collected at 298 K on a 600 MHz spectrometer with *ca.* 5 mg estrone dissolved in 330  $\mu$ L DMSO- $d_6$  soaked in a 60 % poly-HEMA gel of 0.05 % cross-linking ratio stretched in a two-stage NMR tube with 4.2 mm inner diameter at the wider section and 3.0 mm inner diameter at the narrower section.<sup>10</sup>

Table S20. retrorsine (**3**) in poly-HEMA/DMSO

| retrorsine ( <b>3</b> ) | RDC (Hz)            | P1A (Hz) | P2A (Hz) | P1B (Hz) | P2B (Hz) |
|-------------------------|---------------------|----------|----------|----------|----------|
| C7                      | -25.9               | 6.3      | 0.5      | -26.8    | -26.0    |
| C13                     | 10.9                | 12.7     | 6.8      | 3.3      | 2.2      |
| C1                      | 14.1                | 40.8     | 41.8     | 18.3     | 19.1     |
| C5                      | 19.2                | 33.6     | 27.8     | 16.5     | 16.4     |
| C16                     | 8.3                 | 33.2     | 25.3     | 3.5      | 3.3      |
| C22                     | -7.0                | 6.2      | 3.6      | -6.0     | -5.0     |
| C17*                    | -7.1                | 21.3     | 17.0     | -5.8     | -5.2     |
| C15*                    | 18.5                | 6.1      | 7.8      | 14.9     | 12.8     |
| C2*                     | 3.9                 | 2.4      | 0.7      | 2.6      | 1.8      |
| C3*                     | 8.3                 | -1.5     | -3.2     | 4.6      | 4.4      |
| C6*                     | 17.3                | 2.5      | 5.6      | 16.9     | 15.7     |
|                         | RCSA (Hz @ 150 MHz) | P1A (Hz) | P2A (Hz) | P1B (Hz) | P2B (Hz) |
| C19                     | -7.4                | -2.8     | -2.4     | -4.8     | -4.1     |
| C10                     | -8.6                | 3.4      | 2.2      | -5.6     | -4.6     |
| C7                      | 12.6                | 6.6      | 7.6      | 10.8     | 10.0     |
| C13                     | 5.8                 | 2.1      | 4.8      | 6.7      | 6.7      |
| C11                     | 7.0                 | 2.4      | 4.8      | 7.5      | 7.4      |
| C8                      | 14.3                | 5.0      | 6.7      | 11.6     | 10.7     |
| C20                     | 0.4                 | -1.0     | -1.5     | -1.2     | -1.1     |
| C5                      | -2.1                | -3.1     | -2.6     | -1.7     | -1.5     |
| C1                      | 0.4                 | -2.1     | -2.3     | 0.0      | -0.1     |
| C24                     | -1.8                | -2.4     | -2.5     | -2.7     | -2.6     |
| C6                      | -2.6                | 2.5      | 1.6      | -2.7     | -2.5     |
| C17                     | 2.1                 | -4.3     | -3.3     | 2.3      | 2.0      |
| C3                      | -4.8                | -2.6     | -2.7     | -3.4     | -3.2     |
| C15                     | -1.2                | -1.6     | -1.7     | -1.5     | -1.4     |
| C16                     | -1.8                | -1.5     | -1.8     | -2.0     | -1.8     |
| C2                      | -2.1                | -1.9     | -1.7     | -1.7     | -1.5     |
| C14                     | -1.2                | -1.4     | -1.4     | -1.8     | -1.7     |
| C22                     | 1.4                 | -0.4     | -0.1     | 1.3      | 1.2      |

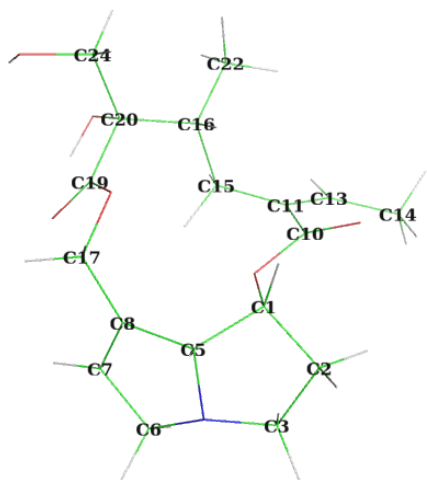

\* methylene RDC is reported as the average of the two  $^1D_{CH}$ 's when the F1-coupled HSQC is used for RDC measurement.

Data were collected at 298 K on a 600 MHz spectrometer with *ca.* 5 mg retrorsine dissolved in 330  $\mu$ L DMSO- $d_6$  soaked in a 60 % poly-HEMA gel of 0.05 % cross-linking ratio stretched in a two-stage NMR tube with 4.2 mm inner diameter at the wider section and 3.0 mm inner diameter at the narrower section.<sup>10</sup>

Table S21. aquatolide (4) in poly-HEMA/DMSO<sup>11</sup>

| aquatolide (4) | RDC (Hz)            | P1A (Hz) | P2A (Hz) | P1B (Hz) | P2B (Hz) |
|----------------|---------------------|----------|----------|----------|----------|
| C14            | -2.6                | -9.6     | -3.5     | -2.1     | -4.3     |
| C1             | 22.2                | 13.8     | 10.8     | 20.0     | 20.8     |
| C9             | 13.5                | 3.7      | 14.6     | 8.4      | 8.8      |
| C8             | -5.4                | -0.9     | -2.8     | -6.6     | -3.4     |
| C3             | 23.1                | 18.9     | 25.0     | 21.9     | 24.2     |
| C16            | 2.9                 | 3.0      | 3.9      | 4.7      | 5.6      |
| C20            | 2.9                 | 0.7      | 1.0      | 2.7      | 1.7      |
| C21            | 1.8                 | 2.9      | 2.9      | 3.0      | 4.2      |
| C10*           | 0.6                 | 3.6      | 3.1      | -3.6     | -2.1     |
| C11*           | 3.2                 | 5.6      | 3.4      | 6.6      | 7.8      |
|                | RCSA (Hz @ 125 MHz) | P1A (Hz) | P2A (Hz) | P1B (Hz) | P2B (Hz) |
| C12            | 4.0                 | 2.1      | 2.0      | 0.2      | 0.8      |
| C13            | 2.5                 | 4.0      | 3.1      | 4.1      | 4.9      |
| C14            | 2.7                 | 3.6      | 2.1      | 3.1      | 3.8      |
| C1             | -1.6                | -0.4     | -0.5     | -1.4     | -1.2     |
| C4             | -1.2                | -0.7     | -0.9     | -0.3     | -0.6     |
| C3             | -1.0                | 0.6      | 0.6      | 0.6      | 0.7      |
| C8             | 0.6                 | -0.6     | -0.9     | -0.1     | -0.3     |
| C9             | -1.6                | -1.4     | -1.8     | -1.3     | -1.6     |
| C2             | 0.3                 | -0.1     | 0.0      | -0.5     | -0.5     |
| C11            | 0.0                 | -0.3     | -0.4     | 0.0      | -0.2     |
| C20            | 0.7                 | -0.2     | -0.2     | -0.6     | -0.4     |
| C21            | 0.1                 | -0.7     | -0.8     | -0.7     | -0.9     |
| C10            | -0.6                | -0.3     | -0.4     | 0.1      | 0.0      |
| C16            | -0.5                | -0.8     | -0.8     | -1.2     | -1.4     |

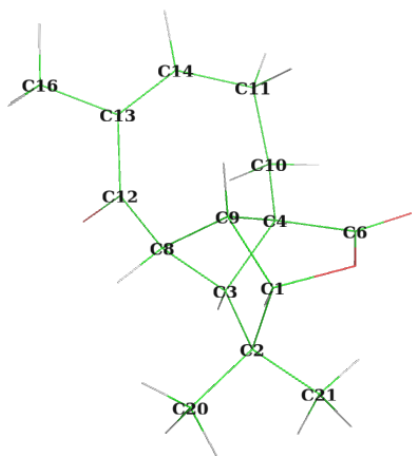

\* methylene RDC is reported as the average of the two  $^1D_{CH}$ 's when the F1-coupled HSQC is used for RDC measurement.

Table S22. menthol (**8**) in poly-HEMA/DMSO<sup>12</sup>

| menthol ( <b>8</b> ) |                                                                                   | RCSA (Hz) | P1A (Hz) | P2A (Hz) | P1B (Hz) | P2B (Hz) |
|----------------------|-----------------------------------------------------------------------------------|-----------|----------|----------|----------|----------|
| C2                   | 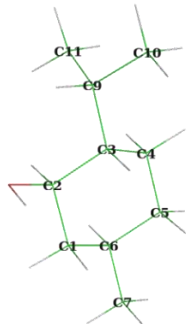 | 7.7       | 5.9      | 5.9      | 5.8      | 5.8      |
| C3                   |                                                                                   | 7.7       | 5.7      | 5.7      | 5.9      | 5.9      |
| C6                   |                                                                                   | 8.5       | 5.9      | 5.9      | 5.9      | 5.8      |
| C9                   |                                                                                   | 4.6       | 2.0      | 2.3      | 3.5      | 4.4      |
| C6                   |                                                                                   | 3.2       | 2.1      | 2.5      | 2.5      | 2.5      |
| C4*                  |                                                                                   | 2.6       | 2.9      | 3.7      | 3.6      | 3.2      |
| C5*                  |                                                                                   | 5.1       | 3.6      | 3.5      | 3.8      | 4.1      |
| C1*                  |                                                                                   | 3.6       | 2.9      | 3.7      | 3.6      | 3.2      |

\* methylene RDC is reported as the average of the two  $^1D_{CH}$ 's when the F1-coupled HSQC is used for RDC measurement.

Table S23. cryptospirolepine (**17**) in poly-HEMA/DMSO<sup>11</sup>

| cryptospirolepine ( <b>17</b> ) |                                                                                     | RDC (Hz)            | P1A (Hz) | P2A (Hz) | P1B (Hz) | P2B (Hz) |
|---------------------------------|-------------------------------------------------------------------------------------|---------------------|----------|----------|----------|----------|
| C1                              | 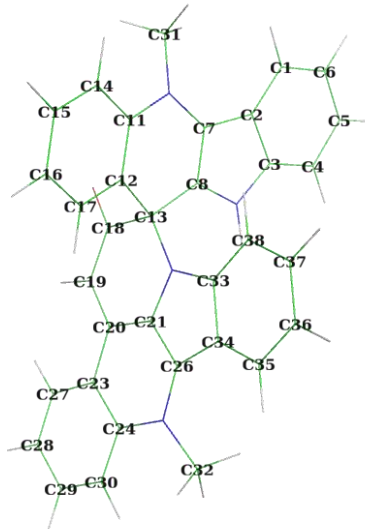 | 17.0                | -10.5    | 15.9     | 2.0      | 14.2     |
| C6                              |                                                                                     | 2.5                 | -30.7    | -2.3     | 3.8      | -1.0     |
| C17                             |                                                                                     | 24.5                | -32.6    | 17.8     | 13.3     | 17.7     |
| C19                             |                                                                                     | 3.3                 | 11.7     | 5.2      | -2.7     | 3.0      |
| C35                             |                                                                                     | 26.5                | -24.1    | 20.4     | 27.8     | 22.2     |
| C4                              |                                                                                     | 15.0                | -9.3     | 15.4     | 2.3      | 13.8     |
| C15                             |                                                                                     | -6.1                | 12.0     | -4.2     | -14.4    | -5.4     |
| C38                             |                                                                                     | 26.4                | -25.1    | 21.3     | 26.9     | 22.8     |
| C36                             |                                                                                     | 8.6                 | 16.0     | 11.4     | 13.1     | 11.0     |
| C37                             |                                                                                     | 3.9                 | -16.5    | 5.7      | -10.2    | 2.9      |
| C27                             |                                                                                     | 20.8                | 1.3      | 19.7     | 29.2     | 21.1     |
| C30                             |                                                                                     | 18.9                | 0.3      | 19.8     | 30.1     | 21.4     |
| C16                             |                                                                                     | -23.6               | -2.8     | -23.9    | -6.9     | -20.8    |
| C14                             |                                                                                     | 20.3                | -32.9    | 17.6     | 12.0     | 17.3     |
| C28                             |                                                                                     | 1.5                 | 4.9      | 1.9      | -8.2     | -0.5     |
| C29                             |                                                                                     | 17.5                | -34.3    | 12.6     | 8.8      | 12.5     |
| C5                              |                                                                                     | -23.8               | 13.4     | -29.0    | -20.2    | -27.5    |
|                                 |                                                                                     | RCSA (Hz @ 125 MHz) | P1A (Hz) | P2A (Hz) | P1B (Hz) | P2B (Hz) |
| C18                             |                                                                                     | -7.0                | 3.6      | -4.9     | -1.8     | -4.3     |
| C11                             |                                                                                     | 4.2                 | 3.7      | 3.4      | 2.0      | 2.9      |
| C33                             |                                                                                     | -7.8                | 2.4      | -6.5     | -5.7     | -6.2     |
| C24                             |                                                                                     | -7.5                | 3.7      | -5.2     | -4.1     | -4.9     |

|     |       |     |      |      |      |
|-----|-------|-----|------|------|------|
| C20 | -9.1  | 6.7 | -6.0 | -3.5 | -5.5 |
| C3  | 1.0   | 6.5 | 1.4  | 0.9  | 1.1  |
| C29 | -10.8 | 9.4 | -7.2 | -6.0 | -7.0 |
| C15 | 3.6   | 1.6 | 2.4  | 3.5  | 2.3  |
| C17 | -1.0  | 7.9 | -0.6 | -0.6 | -0.9 |
| C37 | -8.1  | 6.8 | -6.6 | -3.2 | -6.0 |
| C27 | -10.5 | 3.5 | -7.9 | -8.3 | -7.8 |
| C12 | 2.6   | 3.0 | 2.2  | 3.8  | 2.3  |
| C26 | -5.7  | 3.7 | -4.0 | -2.4 | -3.7 |
| C35 | -10.8 | 5.8 | -7.9 | -8.2 | -8.0 |
| C28 | -7.3  | 3.0 | -5.2 | -3.2 | -4.7 |
| C5  | 6.5   | 1.6 | 6.2  | 5.0  | 5.8  |
| C7  | 4.0   | 0.4 | 3.7  | 3.0  | 3.5  |
| C21 | -6.6  | 4.6 | -4.5 | -2.9 | -4.2 |
| C36 | -8.6  | 1.3 | -7.1 | -6.5 | -6.9 |
| C1  | -1.1  | 6.1 | -0.3 | 1.3  | -0.3 |
| C16 | 6.3   | 3.6 | 5.0  | 2.0  | 4.3  |
| C6  | 1.2   | 8.4 | 1.9  | 1.1  | 1.6  |
| C34 | -7.5  | 5.6 | -5.7 | -3.6 | -5.3 |
| C8  | 3.6   | 0.1 | 4.0  | 3.8  | 3.9  |
| C2  | 4.9   | 2.4 | 3.7  | 3.6  | 3.5  |
| C23 | -9.7  | 6.3 | -6.7 | -6.1 | -6.5 |
| C30 | -10.4 | 4.7 | -7.1 | -7.9 | -7.2 |
| C14 | -0.4  | 6.5 | -0.7 | 0.3  | -0.8 |
| C4  | 0.3   | 3.6 | 0.7  | 1.9  | 0.7  |
| C38 | -10.0 | 7.2 | -7.6 | -6.3 | -7.4 |
| C19 | -3.9  | 1.8 | -3.1 | -1.6 | -2.8 |

## Supplementary References

1. N. Nath, M. Schmidt, R. R. Gil, R. T. Williamson, G. E. Martin, A. Navarro-Vázquez, C. Griesinger and Y. Z. Liu, *J Am Chem Soc*, 2016, **138**, 9548-9556.
2. Y. Z. Liu, I. E. Ndukwe, M. Reibarkh, G. E. Martin and R. T. Williamson, *Phys Chem Chem Phys*, 2022, **24**, 20164-20182.
3. C. Gayathri, N. V. Tsarevsky and R. R. Gil, *Chem-Eur J*, 2010, **16**, 3622-3626.
4. R. R. Gil, C. Gayathri, N. V. Tsarevsky and K. Matyjaszewski, *J Org Chem*, 2008, **73**, 840-848.
5. E. Troche-Pesqueira, C. Anklin, R. R. Gil and A. Navarro-Vázquez, *Angew Chem Int Edit*, 2017, **56**, 3660-3664.
6. F. Hallwass, R. R. Teles, E. Hellemann, C. Griesinger, R. R. Gil and A. Navarro-Vázquez, *Magn Reson Chem*, 2018, **56**, 321-328.
7. S. J. Castro, M. E. García, J. M. Padrón, A. Navarro-Vázquez, R. R. Gil and V. E. Nicotra, *J Nat Prod*, 2018, **81**, 2329-2337.
8. A. Navarro-Vázquez, R. R. Gil and K. Blinov, *J Nat Prod*, 2018, **81**, 203-210.
9. P. Trigo-Mourino, R. Sifuentes, A. Navarro-Vázquez, C. Gayathri, H. Maruenda and R. R. Gil, *Nat Prod Commun*, 2012, **7**, 735-738.
10. Y. Z. Liu and J. H. Prestegard, *J Biomol Nmr*, 2010, **47**, 249-258.
11. Y. Liu, J. Saurí, E. Mevers, M. W. Peczu, H. Hiemstra, J. Clardy, G. E. Martin and R. T. Williamson, *Science*, 2017, **356**.
12. L. F. Gil-Silva, R. Santamaría-Fernández, A. Navarro-Vázquez and R. R. Gil, *Chem-Eur J*, 2016, **22**, 472-476.
